# Supplementary material for: Risk factors for emergence agitation during the awakening period in elderly patients after total joint arthroplasty: a retrospective cohort study
Source: PubMed Central journal article supplement — BMJ Open. 2023 May 10;13(5):e068284. doi: 10.1136/bmjopen-2022-068284 (PMC10174031; doi:10.1136/bmjopen-2022-068284), 2023-05-10
Supplement: bmjopen-2022-068284.draft_revisions.pdf [file bmjopen-2022-068284.draft_revisions.pdf]

# BMJ Open

BMJ Open is committed to open peer review. As part of this commitment we make the peer review history of every article we publish publicly available.

When an article is published we post the peer reviewers' comments and the authors' responses online. We also post the versions of the paper that were used during peer review. These are the versions that the peer review comments apply to.

The versions of the paper that follow are the versions that were submitted during the peer review process. They are not the versions of record or the final published versions. They should not be cited or distributed as the published version of this manuscript.

BMJ Open is an open access journal and the full, final, typeset and author-corrected version of record of the manuscript is available on our site with no access controls, subscription charges or pay-per-view fees (<http://bmjopen.bmj.com>).

If you have any questions on BMJ Open's open peer review process please email [info.bmjopen@bmj.com](mailto:info.bmjopen@bmj.com)

# BMJ Open

## Risk factors for emergence agitation during the awakening period in elderly patients after total joint arthroplasty: a retrospective observational study

|                               |                                                                                                                                                                                                                                                                                                                                                                                                                                                               |
|-------------------------------|---------------------------------------------------------------------------------------------------------------------------------------------------------------------------------------------------------------------------------------------------------------------------------------------------------------------------------------------------------------------------------------------------------------------------------------------------------------|
| Journal:                      | <i>BMJ Open</i>                                                                                                                                                                                                                                                                                                                                                                                                                                               |
| Manuscript ID                 | bmjopen-2022-068284                                                                                                                                                                                                                                                                                                                                                                                                                                           |
| Article Type:                 | Original research                                                                                                                                                                                                                                                                                                                                                                                                                                             |
| Date Submitted by the Author: | 13-Sep-2022                                                                                                                                                                                                                                                                                                                                                                                                                                                   |
| Complete List of Authors:     | Wang, Naigeng; Honghui Hospital, Xi'an Jiaotong University, Department of Anesthesiology<br>Hao, Jianhong; Honghui Hospital, Xi'an Jiaotong University, Department of Anesthesiology<br>Zhang, Jie; Honghui Hospital, Xi'an Jiaotong University, Department of Anesthesiology<br>Du, Jing; Shaanxi University of Chinese Medicine, Second Clinical Medical College<br>luo, zhenguo; Honghui Hospital, Xi'an Jiaotong University, Department of Anesthesiology |
| Keywords:                     | Anaesthesia in orthopaedics < ANAESTHETICS, Adult anaesthesia < ANAESTHETICS, Adult orthopaedics < ORTHOPAEDIC & TRAUMA SURGERY, Knee < ORTHOPAEDIC & TRAUMA SURGERY, Hip < ORTHOPAEDIC & TRAUMA SURGERY                                                                                                                                                                                                                                                      |
|                               |                                                                                                                                                                                                                                                                                                                                                                                                                                                               |

SCHOLARONE™  
Manuscripts

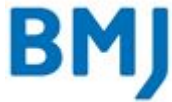

I, the Submitting Author has the right to grant and does grant on behalf of all authors of the Work (as defined in the below author licence), an exclusive licence and/or a non-exclusive licence for contributions from authors who are: i) UK Crown employees; ii) where BMJ has agreed a CC-BY licence shall apply, and/or iii) in accordance with the terms applicable for US Federal Government officers or employees acting as part of their official duties; on a worldwide, perpetual, irrevocable, royalty-free basis to BMJ Publishing Group Ltd ("BMJ") its licensees and where the relevant Journal is co-owned by BMJ to the co-owners of the Journal, to publish the Work in this journal and any other BMJ products and to exploit all rights, as set out in our [licence](#).

The Submitting Author accepts and understands that any supply made under these terms is made by BMJ to the Submitting Author unless you are acting as an employee on behalf of your employer or a postgraduate student of an affiliated institution which is paying any applicable article publishing charge ("APC") for Open Access articles. Where the Submitting Author wishes to make the Work available on an Open Access basis (and intends to pay the relevant APC), the terms of reuse of such Open Access shall be governed by a Creative Commons licence – details of these licences and which [Creative Commons](#) licence will apply to this Work are set out in our licence referred to above.

Other than as permitted in any relevant BMJ Author's Self Archiving Policies, I confirm this Work has not been accepted for publication elsewhere, is not being considered for publication elsewhere and does not duplicate material already published. I confirm all authors consent to publication of this Work and authorise the granting of this licence.

1 **Risk factors for emergence agitation during the awakening**  
2 **period in elderly patients after total joint arthroplasty: a**  
3 **retrospective observational study**

4 Naigeng Wang<sup>1</sup>, Jianhong Hao<sup>1</sup>, Jie Zhang<sup>1</sup>, Jing Du<sup>2</sup>, Zhenguo Luo<sup>1</sup>

5 <sup>1</sup>Department of Anesthesiology, Honghui Hospital, Xi'an Jiaotong University, Xi'an,  
6 Shaanxi Province, China

7 <sup>2</sup>Second Clinical Medical College, Shaanxi University of Chinese Medicine,  
8 Xianyang, Shaanxi Province, China

9 **Email address for each author:**

10 Naigeng Wang: wang17731131252@163.com,

11 Jianhong Hao: sxzyydx123@sina.com,

12 Jie Zhang: 1771362371@qq.com,

13 Jing Du: 365844276@qq.com

14 **Running title:** EA risk factors after TJA

15 **Keywords:** Emergence agitation; Elderly patients; Risk factors; Total joint  
16 arthroplasty

17 **Corresponding author:** Zhenguo Luo

18 Tel: +86-13709147141

19 Email: luozhenguo@stu.xjtu.edu.cn

20 Mailing address: Department of Anesthesiology, Honghui Hospital, Xi'an Jiaotong  
21 University, No.555, Youyi East Road, Xi'an, Shaanxi Province, 710054, China.

1  
2  
3  
4  
5  
6  
7  
8  
9  
10  
11  
12  
13  
14  
15  
16  
17  
18  
19  
20  
21  
22  
23  
24  
25  
26  
27  
28  
29  
30  
31  
32  
33  
34  
35  
36  
37  
38  
39  
40  
41  
42  
43  
44  
45  
46  
47  
48  
49  
50  
51  
52  
53  
54  
55  
56  
57  
58  
59  
60

22 **IRB number:** 201812001 (Biomedical Research Ethics Committee of Honghui

23 Hospital)

24 **Clinical trial registration number:** ChiCTR1800020193

25 **Word count:** 2971

For peer review only

## 43 Abstract

44 **Objectives:** This study aimed to explore the incidence and risk factors for emergence  
45 agitation (EA) in elderly patients who underwent total joint arthroplasty (TJA) under  
46 general anaesthesia and assess their predictive value.

47 **Design:** Single-centre retrospective observational study.

48 **Setting:** A 1,600-bed general tertiary hospital in China.

49 **Participants:** This study enrolled 421 elderly patients scheduled for elective primary  
50 TJA under general anaesthesia.

51 **Primary and Secondary Outcome Measures:** EA was assessed using the Richmond  
52 Agitation Sedation Scale (RASS) during the awakening period after surgery in the  
53 post-anaesthesia care unit (PACU). Risk factors for EA were identified using  
54 univariate and multivariate logistic analyses. The receiver operating characteristic  
55 curve (ROC) was used to assess the predictive value of risk factors for EA.

56 **Results:** The incidence of EA in elderly patients who underwent TJA was 37.6%.  
57 According to the multivariate logistic analysis, patients' visual analogue scale (VAS)  
58 score (95% confidence interval [CI]: 1.951–3.196), male sex (95% CI: 1.781–6.435),  
59 catheter-related bladder discomfort (CRBD) (95% CI: 4.001–15.392), fasting time for  
60 solids (95% CI: 1.260–2.301), and fasting time for fluids (95% CI: 1.263–2.365) were  
61 independent risk factors for EA. As shown by the ROC analysis, patients' VAS score  
62 (95% CI: 0.718–0.819), CRBD (95% CI: 0.673–0.775), fasting time for solids (95%  
63 CI: 0.699–0.807), and fasting time for fluids (95% CI: 0.719–0.816) showed a good  
64 predictive value.

1  
2  
3  
4 65 **Conclusions:** EA was a common complication in elderly patients after TJA. The

5  
6  
7 66 reduction of risk factors contributes to prevention and treatment of EA.

8  
9 67 **Keywords:** Emergence agitation; Elderly patients; Risk factors; Total joint

10  
11  
12 68 arthroplasty

13  
14 69 **Trial Registration:** ChiCTR1800020193

15  
16  
17 70

18  
19  
20 71

21  
22  
23  
24  
25  
26  
27  
28  
29  
30  
31  
32  
33  
34  
35  
36  
37  
38  
39  
40  
41  
42  
43  
44  
45  
46  
47  
48  
49  
50  
51  
52  
53  
54  
55  
56  
57  
58  
59  
60

For peer review only

## 72 Introduction

73 Emergence agitation (EA) is a common complication of the awakening period  
74 after general anaesthesia and refers to a temporary state of mental and motor  
75 excitement [1]. There are several clinical features of EA, including disorientation,  
76 excitation, agitation, and combative behaviours [2,3]. EA can also lead to an increased  
77 risk of wound bleeding or splitting, self-extubation, falling out of bed, and violence  
78 against staff [4]. It may also increase the patient's stay in the PACU and demand on  
79 medical staff [3], and simultaneously, more medical costs are incurred. The incidence  
80 of EA in paediatric patients ranges from 10% to 80% [5]. EA has many risk factors in  
81 paediatric patients, including pain, strange recovery surroundings, anaesthesia  
82 techniques, anaesthetics, patient features, and operative factors [6,7]. Lehmann et al.  
83 [8] reported that propofol was the first choice for preventing and treating EA in  
84 paediatric patients. In addition,  $\alpha$ 2-antagonists (clonidine and dexmedetomidine) have  
85 been shown to reduce the occurrence of EA in paediatric patients significantly  
86 [1,9,10].

87 Previous studies indicated that EA is common in children [11,12]; however,  
88 more recent studies reported that elderly patients are also prone to EA after surgery  
89 [13]. Currently, numerous studies have focused on EA in children, and few have  
90 examined elderly patients. EA in elderly adults may cause more serious consequences  
91 owing to decreased physiological functions and various complications; therefore, it is  
92 necessary to pay more attention to EA in elderly patients.



1  
2  
3  
4 93 The incidence of EA varies according to the type of surgery performed. Card et al.  
5  
6 94 [14] reported that the incidence of EA in adults after non-cardiac surgery was 19%.  
7  
8  
9 95 The incidence of EA in adult patients undergoing nasal and thoracic surgery varies  
10  
11 96 from 2.5% to 22% [3,15]. In a retrospective observational study, Yu et al. [16] found  
12  
13  
14 97 that the incidence of EA in adults was 21.3% and that EA was prone to occur after  
15  
16 98 oral cavity and otolaryngological surgery. Another single-centre prospective study  
17  
18  
19 99 showed that otorhinolaryngology was an independent risk factor for EA in paediatric  
20  
21  
22 100 patients [17]. Osteoarthritis (OA) is the most frequent type of arthritis and affects 1 in  
23  
24  
25 101 3 older people [18]. With the emergence of an ageing society, the incidence of OA is  
26  
27 102 increasing annually. Presently, more than 240 million people worldwide have OA  
28  
29  
30 103 [19]. End-stage OA can be treated with total joint arthroplasty (TJA). Annually, in the  
31  
32  
33 104 United States, more than 1 million people undergo TJA, > 90% due to OA [19]. To  
34  
35 105 date, the mechanisms of EA are unclear, and the risk factors for EA in elderly patients  
36  
37  
38 106 who have undergone TJA are also unknown. Therefore, it is important to explore and  
39  
40  
41 107 avoid the risk factors for EA. Elderly patients with EA will benefit greatly from  
42  
43 108 identification of the risk factors and development of appropriate strategies.

45 109 In this study, we retrospectively collected the medical records of 421 elderly  
46  
47  
48 110 patients who underwent general anaesthesia for TJA and investigated the risk factors  
49  
50  
51 111 for EA. These results provided insights for further treatment.

52  
53 112  
54  
55  
56  
57  
58  
59  
60

## 113 **Materials and methods**

### 114 *Ethics statement*

115 This study was approved by the Biomedical Research Ethics Committee of our  
116 hospital (approval no. 201812001), and the trial was registered in the Chinese Clinical  
117 Registry (ChiCTR, 1800020193). All methods were performed according to relevant  
118 guidelines and regulations. Written informed consent was obtained from all patients.

### 119 *Patients*

120 We enrolled 421 patients who underwent TJA under general anaesthesia at our  
121 hospital between December 2019 and June 2021. The inclusion criteria  
122 included (1) preoperative diagnosis of OA, (2) age  $\geq$  60 years, (3) American Society  
123 of Anaesthesiologists (ASA) physical status I–III, and (4) having undergone  
124 scheduled elective primary TJA under general anaesthesia. Patients with any of the  
125 following conditions were excluded: revision TJA, spinal or epidural anaesthesia,  
126 general anaesthesia within the past 6 months, and preoperative diagnosis of  
127 neuropsychiatric disorder.

### 128 *Routine practice of perioperative management*

129 Anaesthesia was induced with intravenous midazolam, etomidate, sufentanil, and  
130 rocuronium. After 2 min, tracheal intubation was completed. Ultrasound-guided  
131 femoral nerve block was performed in patients undergoing total knee replacement,

1  
2  
3  
4 132 and ultrasound-guided fascia iliac compartment block was performed in patients  
5  
6 133 undergoing total hip replacement. All 20-ml (0.5%) ropivacaine solutions were  
7  
8  
9 134 infused into the nerve block. After induction of anaesthesia, urinary catheterisation  
10  
11  
12 135 was performed in all patients. Anaesthesia was maintained using intravenous  
13  
14 136 remifentanyl and propofol. After the operation, patients were transferred to the PACU.

17 137 All patients were assessed by specialty nurses in the PACU using a standardised  
18  
19 138 protocol, including the visual analogue scale (VAS), RASS, and Steward recovery  
20  
21  
22 139 scores. VAS was used for pain assessment, and flurbiprofen was administered  
23  
24 140 intravenously as an analgesic rescue if the VAS score was  $\geq 5$ . EA was evaluated  
25  
26  
27 141 using the RASS [13]; the score criteria are presented in Table 1. Patients with RASS  $\geq$   
28  
29  
30 142 1 were considered to have EA. For severe agitation (RASS = 4), dexmedetomidine  
31  
32  
33 143 was administered. Patients with ward recovery scores  $> 4$  were transferred to the ward  
34  
35 144 from the PACU.

### 37 145 ***Data collection***

40 146 The following patient-related variables were recorded: (1) population data and  
41  
42  
43 147 medical history, including age, sex, body mass index (BMI), ASA classification,  
44  
45 148 education level, history of heart disease, respiratory disease, hypertension, and  
46  
47  
48 149 diabetes; (2) perioperative clinical information, including operation type and time,  
49  
50  
51 150 body temperature at the end of the surgery, VAS score, catheter-related bladder  
52  
53 151 discomfort (CRBD), preoperative fasting time, intraoperative blood loss, warm  
54  
55  
56 152 treatment, postoperative nausea and vomiting, duration in PACU, RASS, and severe  
57  
58  
59  
60

1  
2  
3  
4 153 intraoperative hypotension (mean arterial pressure < 65 mmHg for at least 1 min); and  
5  
6  
7 154 (3) laboratory tests.

### 9 155 ***Statistical analysis and sample size***

11 156 The sample size was calculated using GPower software version 3.1 (Franz Faul,  
12  
13  
14 157 University of Kiel, Kiel, Germany). The effect size was set to 0.3,  $\alpha$  level to 0.05, and  
15  
16  
17 158 1- $\beta$  to 0.85. A sample size of 100 patients was the optimal sample size required to  
18  
19  
20 159 prove the difference between the 2 groups. Considering that electronic medical  
21  
22  
23 160 records were easy to acquire, we included patients according to the inclusion and  
24  
25 161 exclusion criteria between December 2019 and June 2020.

27 162 Statistical analysis was performed using SPSS version 26.0 (SPSS Inc.,  
28  
29  
30 163 Chicago, IL, USA). Continuous data are presented as the mean  $\pm$  standard deviation,  
31  
32  
33 164 and categorical data are presented as numbers and percentages. Independent risk  
34  
35  
36 165 factors were identified using univariate and multivariate logistic regression analyses.  
37  
38 166 The measurement data were assessed for normal and non-normal distribution. Two  
39  
40  
41 167 independent sample t-tests were used to determine the differences between groups of  
42  
43  
44 168 continuous variables with a normal distribution. The nonparametric Mann–Whitney U  
45  
46  
47 169 test was used to compare differences between groups of continuous variables with  
48  
49  
50 170 non-normal distributions. Chi-square tests were used to determine the differences  
51  
52  
53 171 between the groups of categorical data. Variables with  $P < 0.2$  were entered in  
54  
55  
56 172 multivariate logistic regression analysis. A positive stepwise method was used to  
57  
58  
59 173 adjust for the multiple risk factors. Each variable was expressed as an odds ratio (OR),  
60  
174 and the confidence interval (CI) was 95%. The predictive value of the risk factors for

1  
2  
3  
4 175 EA was assessed using the receiver operating characteristic curve (ROC). The cut-off  
5  
6 176 point was calculated based on the maximum Youden index value. P values < 0.05  
7  
8  
9 177 were considered statistically significant.  
10

11  
12 178 ***Patient and public involvement***  
13

14 179 No patients were involved with design, data provision, analysis or publication of the  
15  
16  
17 180 study  
18  
19  
20  
21  
22  
23  
24  
25  
26  
27  
28  
29  
30  
31  
32  
33  
34  
35  
36  
37  
38  
39  
40  
41  
42  
43  
44  
45  
46  
47  
48  
49  
50  
51  
52  
53  
54  
55  
56  
57  
58  
59  
60

For peer review only

## 181 **Results**

### 182 *General information on the study population*

183 A total of 421 patients met the inclusion and exclusion criteria. However, 11  
184 patients were excluded from the study; 6 were transferred to the intensive care unit  
185 (ICU) postoperatively, and the surgical protocol of 5 patients was changed during the  
186 operation. Finally, 410 patients were included in the statistical analysis (Fig. 1). The  
187 incidence of EA was 37.6% (n = 154) in 410 patients. All patients (n = 410) were  
188 divided into 2 groups: the EA group and non-EA group. There were no significant  
189 differences between the 2 groups in terms of age, BMI, ASA classification, education  
190 level, and medical history (Table 2). The proportion of male patients in the EA group  
191 was significantly higher than that in the non-EA group (P < 0.05).

### 192 *Perioperative clinical information and laboratory test*

193 Univariate analysis showed significant differences between the EA and non-EA  
194 groups in VAS score, body temperature at the end of the surgery, CRBD, preoperative  
195 fasting time, and duration in the PACU.

196 Compared with the non-EA group, the VAS score was higher in the EA group (P  
197 < 0.05), body temperature at the end of surgery was lower in the EA group (P < 0.05),  
198 and the patients' duration in the PACU and preoperative fasting times were longer in  
199 the EA group (P < 0.05). Simultaneously, 119 of 154 patients in the EA group had  
200 CRBD, while 83 of 256 patients in the non-EA group experienced CRBD. This  
201 variable was significantly different between the 2 groups (P < 0.05). Additionally,

1  
2  
3  
4 202 there were no significant differences between the 2 groups in terms of surgery type  
5  
6 203 and time, intraoperative blood loss, intraoperative hypotension, warm treatment, and  
7  
8  
9 204 laboratory tests (Table 3).

### 11 205 ***Multivariate logistic regression analysis***

12  
13  
14 206 Based on the univariate analysis, variables included in the multivariate logistic  
15  
16  
17 207 regression analysis were VAS score, male sex, body temperature at the end of  
18  
19  
20 208 surgery, duration of PACU, preoperative fasting time, and CRBD.

21  
22 209 As shown in Fig. 2, the correlation between VAS score, male sex, preoperative  
23  
24  
25 210 fasting time, CRBD, and EA in the TOA could be determined based on multivariate  
26  
27  
28 211 logistic analysis. In particular, the VAS score (OR = 2.497; 95% CI: 1.951–3.196),  
29  
30  
31 212 male sex (OR = 3.391; 95% CI: 1.781–6.435), CRBD (OR = 7.847; 95% CI: 4.001–  
32  
33  
34 213 15.392), fasting time for solids (OR = 1.703; 95% CI: 1.260–2.301), and fasting time  
35  
36  
37 214 for fluids (OR = 1.728; 95% CI: 1.263–2.365) were independent risk factors.

38 215 However, we could not confirm the independence of variables, such as body  
39  
40  
41 216 temperature at the end of surgery and PACU duration, in the multivariate logistic  
42  
43  
44 217 analysis.

### 45 218 ***Results of ROC curves for risk factors***

46  
47  
48 219 The predictive value analysed using the ROC curve is demonstrated in Fig. 3.  
49  
50  
51 220 The area under the ROC curve (AUC) for the VAS score was 0.769, with a cut-off  
52  
53  
54 221 value of 4.0, sensitivity of 60%, and specificity of 87% (95% CI: 0.718–0.819, P <  
55  
56  
57 222 0.001). The AUC of fasting time for solids was 0.753, with a cut-off value of 10.5,  
58  
59  
60 223 sensitivity of 62%, and specificity of 86% (95% CI: 0.699–0.807, P < 0.001). The

1  
2  
3  
4 224 AUC of fasting time for fluids was 0.768, with a cut-off value of 8.5, sensitivity of  
5  
6 225 64%, and specificity of 74% (95% CI: 0.719–0.816,  $P < 0.001$ ).  
7  
8

9 226  
10  
11  
12  
13  
14  
15  
16  
17  
18  
19  
20  
21  
22  
23  
24  
25  
26  
27  
28  
29  
30  
31  
32  
33  
34  
35  
36  
37  
38  
39  
40  
41  
42  
43  
44  
45  
46  
47  
48  
49  
50  
51  
52  
53  
54  
55  
56  
57  
58  
59  
60

For peer review only



## 227 **Discussion**

228       The results of the present study indicated that EA was a common postoperative  
229 complication in patients who underwent general anaesthesia for TJA. Furthermore,  
230 this study identified 4 risk factors associated with the postoperative period in elderly  
231 patients who underwent TJA, including male sex, preoperative fasting time, CRBD,  
232 and postoperative pain.

233       The incidence of EA was 37.6% in elderly patients who underwent TJA. To our  
234 knowledge, this is the first report of EA in elderly patients who have undergone TJA.  
235 The incidence of EA could only be compared with other types of surgery and other  
236 assessment methods. However, previous studies have indicated that the incidence of  
237 EA varies. A recent prospective study showed that 158 of 1136 adult patients were  
238 determined to have EA according to the RASS [20]. Xi et al. [13] reported that the  
239 incidence of EA in elderly patients who underwent gastrointestinal surgery was 40%  
240 based on the Ricker Sedation-Agitation Scale (RSAS). Surprisingly, the incidence of  
241 EA was up to 90.5% because of the negative effects of succinylcholine [21]. These  
242 large differences may be attributed to the different types of surgery, anaesthetic  
243 management, patient characteristics, and assessment methods.

244       There are many scales for assessing EA, including the RASS, RSAS, motor  
245 activity assessment scale, and New Sheffield sedation scale. The RASS has been  
246 proven to have excellent reliability and validity in assessing sedation and agitation in  
247 the ICU [22]. Although the reliability and validity of the RASS in the PACU have not

1  
2  
3  
4 248 been validated, the RASS is easy to use and administer and has discrete criteria [22].  
5  
6  
7 249 Owing to these advantages, the RASS was chosen to assess EA in the PACU in this  
8  
9  
10 250 study. Similarly, Makarem et al. [20] and Xi et al. [13] also chose the RASS to assess  
11  
12 251 EA in the PACU.

13  
14 252 Almost all researchers agree that postoperative pain is an independent risk factor  
15  
16  
17 253 for EA. Many clinical practices suggest that postoperative pain is bound to cause  
18  
19  
20 254 uncomfortable emotional experiences and lead to a series of dysregulated behaviours.  
21  
22 255 Our study showed that the VAS score of patients in the EA group was higher than that  
23  
24  
25 256 in the non-EA group, and postoperative pain VAS score  $\geq 4$  was the cut-off point for  
26  
27 257 EA. Pain after TJA is common, and several studies have found that  $> 50\%$  of patients  
28  
29  
30 258 have suboptimal pain management after total hip arthroplasty (THA), and 75% of  
31  
32  
33 259 patients undergoing total knee arthroplasty (TKA) complain of moderate-to-severe  
34  
35 260 pain [23,24]. In the present study, 72% (n = 295) patients complained of pain, and 5%  
36  
37  
38 261 (n = 21) patients experienced severe pain, comparable to the results of previous  
39  
40  
41 262 reports. Yu et al. [16] found that nearly half of the patients had EA because of a lack  
42  
43  
44 263 of postoperative analgesia. It is well accepted that peripheral nerve blocks (PNBs)  
45  
46 264 provide excellent analgesia. In our study, to improve postoperative analgesia, femoral  
47  
48  
49 265 nerve block was routinely used in patients undergoing TKA, and fascia iliaca  
50  
51 266 compartment block was used for THA. In our clinical practice, every patient  
52  
53  
54 267 undergoes ultrasound-guided PNB. However, considering anatomic variations and  
55  
56  
57 268 individual characteristics, PNBs do not result in an absolute lack of pain in patients  
58  
59 269 undergoing TJA; hence, some patients still experience EA due to postoperative pain.

1  
2  
3  
4 270 Moreover, postoperative pain is not just wound related; sore throat and  
5  
6 271 catheter-related pain should not be ignored. Based on these findings, we strongly  
7  
8  
9 272 suggest that multimodal analgesia should be performed although it greatly benefits  
10  
11  
12 273 patients with preventive analgesia.

13  
14 274 Placement of an indwelling catheter is a common clinical operation in the  
15  
16  
17 275 perioperative period. The collected urine is used for urine measurements and blood  
18  
19  
20 276 volume evaluation. However, patients undergoing urinary catheterisation are prone to  
21  
22 277 develop CRBD [25], characterised by discomfort confined to the suprapubic region,  
23  
24 278 burning sensation, pain, urinary urgency, and frequency [26,27]. CRBD can occur in  
25  
26  
27 279 47–90% of patients with a urinary catheter [4]. CRBD can enhance the incidence of  
28  
29  
30 280 EA and pain sensation after surgery [28]. A retrospective study reported that  
31  
32 281 approximately 10% of patients experienced EA during urological surgery, which may  
33  
34  
35 282 be related to CRBD [29]. In our study, 119 of 410 patients experienced EA due to  
36  
37  
38 283 CRBD. The higher incidence of EA in our study may have been due to the age of the  
39  
40 284 recruited patients because age  $\geq 50$  years was an independent predictor of CRBD [30].  
41  
42  
43 285 Presently, many researchers have focused on EA associated with CRBD in patients  
44  
45 286 undergoing urological surgery and rarely in patients undergoing TJA. It is necessary  
46  
47  
48 287 to remove urinary and indwelling catheters under topical anaesthesia early and avoid  
49  
50  
51 288 urinary catheterisation (if possible) to decrease EA associated with CRBD.

52  
53 289 Regarding male patients, the conclusion of this study is similar to those of other  
54  
55  
56 290 studies; male sex was an independent risk factor for EA [30]. The fact that male  
57  
58  
59 291 patients were prone to EA can be explained by the following points: male patients  
60

1  
2  
3  
4 292 were high-risk patients with CRBD [30]. Half of all men aged  $\geq 50$  years and over  
5  
6 293 80% of men aged  $\geq 80$  years have prostatic hyperplasia [31]. They easily felt  
7  
8  
9 294 discomfort and pain when the tip of the catheter was in contact with the bladder  
10  
11 295 triangle on the pubis. Notably, an indwelling catheter without discomfort was used  
12  
13  
14 296 after anaesthesia induction. However, during the awakening period, patients,  
15  
16  
17 297 especially male patients, find it difficult to bear unexpected catheter-related  
18  
19 298 discomfort. Furthermore, postoperative pain tolerance in male patients is low, and  
20  
21  
22 299 male patients require more analgesics than female patients [32].  
23

24  
25 300 The relationship between emergence delirium (ED) and fasting time has also  
26  
27 301 been demonstrated. Khanna et al. [33] reported that prolonged preoperative fasting (>  
28  
29 302 6 h) was a risk factor for postoperative ED in children. However, the relationship  
30  
31  
32 303 between preoperative fasting time and EA in elderly patients has not been reported.  
33  
34  
35 304 This study showed that patients in the EA group had a longer preoperative fasting  
36  
37 305 time; meanwhile, 10.5 h (fasting time for solids) and 8.6 h (fasting time for fluids) are  
38  
39  
40 306 cut-off points for EA. Prolonged preoperative fasting can cause metabolic, physical,  
41  
42  
43 307 and psychological discomfort in patients, eventually leading to EA [34]. Prolonged  
44  
45  
46 308 preoperative fasting translates to a prolonged preoperative waiting time, leading to  
47  
48 309 patient apprehension and anxiety. Preoperative anxiety is a risk factor for EA [29].  
49  
50  
51 310 Owing to a large number of patients and the lack of medical resources, patients may  
52  
53 311 undergo surgery later than expected, thereby prolonging the fasting time. Thus, it is  
54  
55  
56 312 necessary to reasonably schedule operations to decrease EA and reduce unnecessary  
57  
58 313 fasting times.  
59  
60

1  
2  
3  
4 314 This study has some limitations. First, because this was a single-centre study, the  
5  
6 315 sample size was small, and the representative conclusions were insufficient. As the  
7  
8  
9 316 same surgical team performed all operations, the effect of operation time on EA could  
10  
11 317 not be evaluated. Therefore, expanding the sample size and increasing the number of  
12  
13  
14 318 research centres is necessary. Second, all study patients received an indwelling  
15  
16  
17 319 catheter, and CRBD was a risk factor for EA. Thus, the conclusions of this study may  
18  
19  
20 320 not apply to patients undergoing TJA without catheterisation. Third, EA is different  
21  
22 321 from ED. Delirium is an acute state of mental confusion characterised by hypoactivity  
23  
24  
25 322 or hyperactivity [35]. A proportion of patients with delirium present with agitation,  
26  
27  
28 323 making assessment of EA difficult during recovery from anaesthesia. Therefore, we  
29  
30 324 evaluated only EA, which may have led to false-positive cases.

## 325 **Conclusion**

326 This retrospective study showed that the incidence rate of EA in elderly patients  
327 after TJA in the PACU was 37.6%. Postoperative pain, CRBD, male sex, and  
328 preoperative fasting duration were independent predictors of EA. To date, the  
329 pathophysiological mechanism of EA is unknown; hence, it is  
330 more important to prevent EA than to treat it, while the best choice should be to  
331 eliminate and avoid risk factors.

## 332 ***Strengths and limitations of this study***

333 ➤ Previous studies indicated that EA is common in children; however, more recent  
334 studies reported that elderly patients are also prone to EA after surgery.

335 Therefore, this study was the first to explore the incidence and risk factors for EA

1  
2  
3  
4 336 in elderly patients who underwent TJA under general anaesthesia and assess their  
5  
6  
7 337 predictive value.

8  
9 338 ➤ This study explored the incidence and risk factors for EA in elderly patients and  
10  
11  
12 339 assessed their predictive value, which could provide insights for further  
13  
14 340 treatment.

15  
16  
17 341 ➤ This was a single-centre study, the sample size was small. Moreover, since all  
18  
19  
20 342 patients in this study received an indwelling catheter, the finding of this study  
21  
22 343 may not apply to patients who received TJA without catheter insertion.

23  
24 344 ➤ EA is different from emergence delirium. A proportion of patients with delirium  
25  
26  
27 345 present with agitation, making the assessment of EA difficult during recovery  
28  
29  
30 346 from anaesthesia. Therefore, we evaluated only EA, which may have led to  
31  
32  
33 347 false-positive cases.

34  
35 348 **Funding:** This work was supported by the Key Research and Development Program  
36  
37  
38 349 of Shaanxi, China(2019SF-205, 2022SF-149)

39  
40 350 **Acknowledgements:** We would like to thank Editage ([www.editage.cn](http://www.editage.cn)) for English  
41  
42  
43 351 language editing.

44  
45 352 **Data Statement:** No additional data are available.

46  
47  
48 353 **Author Contributions:** Zhenguo Luo and Jianhong Hao have given substantial  
49  
50  
51 354 contributions to the conception or the design of the manuscript. Naigeng Wang wrote  
52  
53  
54 355 this manuscript and made some changes after review. At the same time, he worked  
55  
56  
57 356 with Jing Du and Jie Zhang to acquire, analyse and interpret the data. All authors have  
58  
59  
60 357 participated to drafting the manuscript, Zhenguo Luo revised it critically. All authors

1  
2  
3  
4  
5  
6  
7  
8  
9  
10  
11  
12  
13  
14  
15  
16  
17  
18  
19  
20  
21  
22  
23  
24  
25  
26  
27  
28  
29  
30  
31  
32  
33  
34  
35  
36  
37  
38  
39  
40  
41  
42  
43  
44  
45  
46  
47  
48  
49  
50  
51  
52  
53  
54  
55  
56  
57  
58  
59  
60

358 contributed equally to the manuscript and read and approved the final version of the  
359 manuscript.

360 **Conflict of interest:** No potential conflict of interest relevant to this article was  
361 reported.

362

For peer review only

## References

1. Yang X, Hu Z, Peng F, et al. Effects of Dexmedetomidine on Emergence Agitation and Recovery Quality Among Children Undergoing Surgery Under General Anesthesia: A Meta-Analysis of Randomized Controlled Trials. *Front Pediatr.* 2020;8: 580226.
2. Shi Y, Zhang X, Sun Y, et al. Emergence agitation after the cleft lip or palate surgery in pediatric patients: a prospective study. *J Stomatol Oral Maxillofac Surg.* 2021;122(6): 539-543.
3. Kim H-J, Kim D-K, Kim H-Y, et al. Risk factors of emergence agitation in adults undergoing general anesthesia for nasal surgery. *Clin Exp Otorhinolaryngol.* 2015;8(1): 46-51.
4. Zhou H, Pan Y, Liu C, et al. Emergence agitation after intraoperative neurolytic celiac plexus block with alcohol: a case report. *BMC Anesthesiol.* 2021;21(1): 204.
5. Ng KT, Sarode D, Lai YS, et al. The effect of ketamine on emergence agitation in children: A systematic review and meta-analysis. *Paediatr Anaesth.* 2019;29(12): 1163-1172.
6. Silva LMD, Braz LG, Módolo NSP. Emergence agitation in pediatric anesthesia: current features. *J Pediatr (Rio J).* 2008;84(2): 107-113.
7. Kanaya A. Emergence agitation in children: risk factors, prevention, and treatment. *J Anesth.* 2016;30(2): 261-267.



1  
2  
3  
4  
5  
6  
7  
8  
9  
10  
11  
12  
13  
14  
15  
16  
17  
18  
19  
20  
21  
22  
23  
24  
25  
26  
27  
28  
29  
30  
31  
32  
33  
34  
35  
36  
37  
38  
39  
40  
41  
42  
43  
44  
45  
46  
47  
48  
49  
50  
51  
52  
53  
54  
55  
56  
57  
58  
59  
60

- 384 8. Lehmann V, Giest J, Wermelt J, et al. Pediatric emergence agitation.  
385 *Anaesthetist*. 2015;64(5): 373-380.
- 386 9. Zhang C, Li J, Zhao D, et al. Prophylactic midazolam and clonidine for  
387 emergence from agitation in children after emergence from sevoflurane  
388 anesthesia: a meta-analysis. *Clin Ther*. 2013;35(10): 1622-1631.
- 389 10. Mountain BW, Smithson L, Cramolini M, et al. Dexmedetomidine as a  
390 pediatric anesthetic premedication to reduce anxiety and to deter emergence  
391 delirium. *AANA J*. 2011;79(3): 219-224.
- 392 11. Smessaert A, Schehr CA, Artusio JF. Observations in the immediate  
393 postanaesthesia period. II. Mode of recovery. *Br J Anaesth*. 1960;32: 181-185.
- 394 12. Eckenhoff JE, Kneale DH, Dripps RD. The incidence and etiology of  
395 postanesthetic excitement. A clinical survey. *Anesthesiology*. 1961;22:  
396 667-673.
- 397 13. Mei X, Tong J. The plasma levels of brain-derived neurotrophic factor are  
398 positively associated with emergence agitation in the elderly after  
399 gastrointestinal surgery. *J Anesth*. 2016;30(5): 811-816.
- 400 14. Card E, Pandharipande P, Tomes C, et al. Emergence from general anaesthesia  
401 and evolution of delirium signs in the post-anaesthesia care unit. *Br J Anaesth*.  
402 2015;115(3): 411-417.
- 403 15. Jo J-Y, Jung K-W, Kim H-J, et al. Effect of Total Intravenous Anesthesia vs  
404 Volatile Induction With Maintenance Anesthesia on Emergence Agitation

- 1  
2  
3  
4 405 After Nasal Surgery: A Randomized Clinical Trial. *JAMA Otolaryngol Head*  
5  
6 406 *Neck Surg.* 2019;145(2): 117-123.  
7  
8  
9 407 16. Yu D, Chai W, Sun X, et al. Emergence agitation in adults: risk factors in  
10  
11 408 2,000 patients. *Can J Anaesth.* 2010;57(9): 843-848.  
12  
13  
14 409 17. Voepel-Lewis T, Malviya S, Tait AR. A prospective cohort study of  
15  
16 410 emergence agitation in the pediatric postanesthesia care unit. *Anesth Analg.*  
17  
18 411 2003;96(6): 1625-1630.  
19  
20  
21 412 18. Hawker GA. Osteoarthritis is a serious disease. *Clin Exp Rheumatol.* 2019;37  
22  
23 413 Suppl 120(5): 3-6.  
24  
25  
26 414 19. Katz JN, Arant KR, Loeser RF. Diagnosis and Treatment of Hip and Knee  
27  
28 415 Osteoarthritis: A Review. *JAMA.* 2021;325(6): 568-578.  
29  
30  
31 416 20. Makarem J, Larijani AH, Eslami B, et al. Risk factors of inadequate  
32  
33 417 emergence following general anesthesia with an emphasis on patients with  
34  
35 418 substance dependence history. *Korean J Anesthesiol.* 2020;73(4): 302-310.  
36  
37  
38 419 21. Lee S-J, Sung T-Y, Cho C-K. Comparison of emergence agitation between  
39  
40 420 succinylcholine and rocuronium-sugammadex in adults following closed  
41  
42 421 reduction of a nasal bone fracture: a prospective randomized controlled trial.  
43  
44 422 *BMC Anesthesiol.* 2019;19(1): 228.  
45  
46  
47 423 22. Sessler CN, Gosnell MS, Grap MJ, et al. The Richmond Agitation-Sedation  
48  
49 424 Scale: validity and reliability in adult intensive care unit patients. *Am J Respir*  
50  
51 425 *Crit Care Med.* 2002;166(10): 1338-1344.  
52  
53  
54  
55  
56  
57  
58  
59  
60

1  
2  
3  
4  
5  
6  
7  
8  
9  
10  
11  
12  
13  
14  
15  
16  
17  
18  
19  
20  
21  
22  
23  
24  
25  
26  
27  
28  
29  
30  
31  
32  
33  
34  
35  
36  
37  
38  
39  
40  
41  
42  
43  
44  
45  
46  
47  
48  
49  
50  
51  
52  
53  
54  
55  
56  
57  
58  
59  
60

- 426 23. De Luca ML, Ciccarello M, Martorana M, et al. Pain monitoring and  
427 management in a rehabilitation setting after total joint replacement. *Medicine*  
428 (*Baltimore*). 2018;97(40): e12484.
- 429 24. Erlenwein J, Müller M, Falla D, et al. Clinical relevance of persistent  
430 postoperative pain after total hip replacement - a prospective observational  
431 cohort study. *J Pain Res*. 2017;10: 2183-2193.
- 432 25. Jang EB, Hong SH, Kim KS, et al. Catheter-Related Bladder Discomfort: How  
433 Can We Manage It? *Int Neurourol J*. 2020;24(4): 324-331.
- 434 26. Bach H, Kaasby K, Sørensen A, et al. Incidence and Severity of  
435 Catheter-Related Bladder Discomfort Among Nonurological Adult Patients in  
436 a Postanesthesia Care Unit. *J Perianesth Nurs*. 2020;35(1): 29-33.
- 437 27. Kim D-H, Park J-Y, Yu J, et al. Intravenous Lidocaine for the Prevention of  
438 Postoperative Catheter-Related Bladder Discomfort in Male Patients  
439 Undergoing Transurethral Resection of Bladder Tumors: A Randomized,  
440 Double-Blind, Controlled Trial. *Anesth Analg*. 2020;131(1): 220-227.
- 441 28. Binhas M, Motamed C, Hawajri N, et al. Predictors of catheter-related bladder  
442 discomfort in the post-anaesthesia care unit. *Ann Fr Anesth Reanim*.  
443 2011;30(2): 122-125.
- 444 29. Kim H-C, Kim E, Jeon Y-T, et al. Postanaesthetic emergence agitation in adult  
445 patients after general anaesthesia for urological surgery. *J Int Med Res*.  
446 2015;43(2): 226-235.

- 1  
2  
3  
4 447 30. Li SY, Song LP, Ma YS, et al. Predictors of catheter-related bladder  
5  
6 448 discomfort after gynaecological surgery. *BMC Anesthesiol.* 2020;20(1): 97.  
7  
8  
9 449 31. Chughtai B, Forde JC, Thomas DDM, et al. Benign prostatic hyperplasia. *Nat*  
10  
11 450 *Rev Dis Primers.* 2016;2: 16031.  
12  
13  
14 451 32. Tsui SL, Tong WN, Irwin M, et al. The efficacy, applicability and side-effects  
15  
16 452 of postoperative intravenous patient-controlled morphine analgesia: an audit of  
17  
18 453 1233 Chinese patients. *Anaesth Intensive Care.* 1996;24(6): 658-664.  
19  
20  
21  
22 454 33. Khanna P, Saini K, Sinha R, et al Correlation between duration of preoperative  
23  
24 455 fasting and emergence delirium in pediatric patients undergoing ophthalmic  
25  
26 456 examination under anesthesia: A prospective observational study. *Paediatr*  
27  
28 457 *Anaesth.* 2018;28(6): 547-551.  
29  
30  
31  
32 458 34. Jin Z, Hu J, Ma D. Postoperative delirium: perioperative assessment, risk  
33  
34 459 reduction, and management. *Br J Anaesth.* 2020;125(4): 492-504.  
35  
36  
37  
38 460 35. Fields A, Huang J, Schroeder D, et al. Agitation in adults in the  
39  
40 461 post-anaesthesia care unit after general anaesthesia. *Br J Anaesth.* 2018;121(5):  
41  
42 462 1052-1058.  
43  
44  
45  
46 463  
47  
48 464  
49  
50  
51  
52  
53  
54  
55  
56  
57  
58  
59  
60

465 **Tables**466 **Table 1 Richmond agitation sedation scale**

| Score | Term              | Description                                                                                   |
|-------|-------------------|-----------------------------------------------------------------------------------------------|
| +4    | Combative         | Overtly combative, violent, immediate danger to staff                                         |
| +3    | Very agitated     | Pulls or removes tube(s) or catheter(s); aggressive                                           |
| +2    | Agitated          | Frequent nonpurposeful movement, fights ventilator                                            |
| +1    | Restless          | Anxious but movements not aggressive or vigorous                                              |
| 0     | Alert and calm    |                                                                                               |
| -1    | Drowsy            | Not fully alert, but has sustained awakening (eye-opening/eye contact) to voice (>10 seconds) |
| -2    | Light sedation    | Briefly awakens with eye contact to voice (<10 seconds)                                       |
| -3    | Moderate sedation | Movement or eye opening to voice (but no eye contact)                                         |
| -4    | Deep sedation     | No response to voice, but movement or eye opening to physical stimulation                     |
| -5    | Unarousable       | No response to voice or physical stimulation                                                  |

467

468 **Notes:** Scores of 1 to 4 indicated different levels of agitation, 0 indicated calmness

469 and alertness, and -1 to -5 indicated different levels of sedation.

470

471

472 **Table 2 Population data and medical history**

| Variables                        | Agitation Groups(n=154) | Non-agitation Groups(n=256) | P-value    |
|----------------------------------|-------------------------|-----------------------------|------------|
| <b>Age</b>                       | 69. 84±6. 53            | 69. 39±6. 82                | 0. 238     |
| <b>Male (n, %)</b>               | 91 (59. 1%)             | 71 (27. 7%)                 | <0. 001*** |
| <b>BMI (Kg. m<sup>-2</sup>)</b>  | 22. 75±4. 31            | 23. 17±2. 56                | 0. 253     |
| <b>ASA classification (n, %)</b> |                         |                             | 0. 221     |
| I                                | 0                       | 0                           |            |
| II                               | 118 (76. 6%)            | 182 (71. 1%)                |            |
| III                              | 36 (23. 4%)             | 74 (28. 9%)                 |            |
| <b>Education (n, %)</b>          |                         |                             | 0. 412     |
| Illiteracy                       | 42 (27. 3%)             | 55 (21. 5%)                 |            |
| Primary school                   | 45 (29. 2%)             | 93 (36. 3%)                 |            |
| Secondary school                 | 59 (38. 3%)             | 96 (37. 5%)                 |            |
| University and above             | 8 (5. 2%)               | 12 (4. 7%)                  |            |
| <b>Medical history (n, %)</b>    |                         |                             |            |
| Heart disease                    |                         |                             | 0. 816     |
| Yes                              | 72 (46. 8%)             | 113 (44. 1%)                |            |
| No                               | 82 (53. 2%)             | 143 (55. 9%)                |            |
| Respiratory diseases             |                         |                             | 0. 760     |
| Yes                              | 80 (51. 9%)             | 129 (50. 4%)                |            |
| No                               | 74 (48. 1%)             | 127 (49. 6%)                |            |

473 **Table2 (Continued)**

| Variables    | Agitation Groups<br>(n=154) | Non-agitation Groups<br>(n=256) | P-value |
|--------------|-----------------------------|---------------------------------|---------|
| Hypertension |                             |                                 | 0. 981  |
| Yes          | 78 (50. 6%)                 | 131 (51. 2%)                    |         |
| No           | 76 (49. 4%)                 | 125 (48. 8%)                    |         |
| Diabetes     |                             |                                 | 0. 940  |
| Yes          | 71 (46. 1%)                 | 119 (46. 5%)                    |         |
| No           | 83 (53. 9%)                 | 137 (53. 5%)                    |         |

474 **Notes:** Clinical information of patients were analyzed by univariate analysis.

475 Continuous data are presented as the mean  $\pm$  standard deviation, and categorical data

476 are presented as numbers and percentages. \*P-value, differences between patients

477 in two groups. \*P<0. 05, \*\*\*P<0. 001. ASA: American Society of

478 Anesthesiologists; BMI: body mass index.

479

480

481

482

483

484

485

486 **Table 3 Patients' perioperative clinical information and agitation-related**  
 487 **laboratory test indicators**

| Variables                                                  | Agitation<br>Groups<br>(n=154) | Non-agitation<br>Groups<br>(n=256) | P-value   |
|------------------------------------------------------------|--------------------------------|------------------------------------|-----------|
| <b>Operation type (n, %)</b>                               |                                |                                    | 0.524     |
| TKA                                                        | 85 (55.2%)                     | 133 (52.0%)                        |           |
| THA                                                        | 69 (44.8%)                     | 123 (48.0%)                        |           |
| <b>Operation time in TKA (min)</b>                         | 144.42±59.96                   | 143.91±46.19                       | 0.236     |
| <b>Operation time in THA (min)</b>                         | 139.96±64.60                   | 128.48±58.98                       | 0.213     |
| <b>Patients' VAS score</b>                                 | 3.50±2.13                      | 1.67±1.02                          | <0.001*** |
| <b>Body temperature at the end of the<br/>surgery (°C)</b> | 35.87±0.73                     | 36.03±0.94                         | 0.037*    |
| <b>CRBD (n, %)</b>                                         |                                |                                    | <0.001*** |
| Yes                                                        | 119(77.3%)                     | 83 (32.4%)                         |           |
| No                                                         | 35(22.7%)                      | 173(67.6%)                         |           |
| <b>Preoperative fasting time (h)</b>                       |                                |                                    |           |
| Fasting time for solids                                    | 10.19±1.05                     | 8.76±0.88                          | <0.001*** |
| Fasting time for fluids                                    | 4.81±1.14                      | 2.99±0.92                          | <0.001*** |
| <b>Intraoperative blood loss (ml)</b>                      | 217.26±30.18                   | 200.32±27.48                       | 0.224     |

488



1  
2  
3  
4  
5  
6  
7  
8  
9  
10  
11  
12  
13  
14  
15  
16  
17  
18  
19  
20  
21  
22  
23  
24  
25  
26  
27  
28  
29  
30  
31  
32  
33  
34  
35  
36  
37  
38  
39  
40  
41  
42  
43  
44  
45  
46  
47  
48  
49  
50  
51  
52  
53  
54  
55  
56  
57  
58  
59  
60489 **Table3 (Continued)**

| Variables                                | Agitation Groups<br>(n=154) | Non-agitation Groups<br>(n=256) | P-value |
|------------------------------------------|-----------------------------|---------------------------------|---------|
| <b>Severe Intraoperative hypotension</b> |                             |                                 | 0. 261  |
| <b>(n, %)</b>                            |                             |                                 |         |
| Yes                                      | 14 (9. 1%)                  | 15 (5. 9%)                      |         |
| No                                       | 140 (90. 9%)                | 241 (94. 1%)                    |         |
| <b>Postoperative nausea and vomiting</b> |                             |                                 | 0. 332  |
| <b>(n, %)</b>                            |                             |                                 |         |
| Yes                                      | 67 (43. 5%)                 | 124 (48. 4%)                    |         |
| No                                       | 87 (56. 5%)                 | 132 (51. 6%)                    |         |
| <b>The duration in PACU (min)</b>        | 32. 83±14. 07               | 31. 00±8. 57                    | 0. 025* |
| <b>Warm treatment (n, %)</b>             |                             |                                 | 0. 880  |
| Yes                                      | 68 (44. 2%)                 | 115 (44. 9%)                    |         |
| No                                       | 86 (55. 8%)                 | 141 (55. 1%)                    |         |
| <b>Laboratory testing</b>                |                             |                                 |         |
| HCO <sub>3</sub> <sup>-</sup> (mmol/L)   | 22. 3±1. 86                 | 24. 7±1. 33                     | 0. 291  |
| PaCO <sub>2</sub> (mmHg)                 | 38. 61±1. 42                | 39. 44±1. 58                    | 0. 318  |
| PaO <sub>2</sub> (mmHg)                  | 89. 52±1. 74                | 90. 17±1. 55                    | 0. 282  |
| pH                                       | 7. 447±0. 32                | 7. 426±0. 41                    | 0. 263  |
| Hb levels (g/L)                          | 16. 6±1. 93                 | 17. 1±1. 85                     | 0. 274  |

1  
2  
3  
4 490 **Notes:** Patients' perioperative clinical information and agitation-related laboratory  
5  
6 491 test indicators were analyzed by univariate analysis. Continuous data are presented  
7  
8  
9 492 as the mean  $\pm$  standard deviation, and categorical data are presented as numbers and  
10  
11 493 percentages. \*P-value, differences between patients in two groups. \*P<0. 05,  
12  
13  
14 494 \*\*\*P<0. 001. TKA: total knee arthroplasty; THA: total hip arthroplasty; VAS:  
15  
16  
17 495 visual analog scale; CRBD: catheter-related bladder discomfort; PACU:  
18  
19 496 post-anesthesia care unit.  
20  
21  
22  
23  
24  
25  
26  
27  
28  
29  
30  
31  
32  
33  
34  
35  
36  
37  
38  
39  
40  
41  
42  
43  
44  
45  
46  
47  
48  
49  
50  
51  
52  
53  
54  
55  
56  
57  
58  
59  
60

1  
2  
3  
4 512 **Figure legends**

5  
6 513 **Figure 1 Flow chart of study participants.** A total of 421 patients met the inclusion  
7  
8  
9 514 and exclusion criteria. However, 11 patients were excluded from the study; 6 were  
10  
11  
12 515 transferred to the ICU postoperatively, and the surgical protocol of 5 patients was  
13  
14  
15 516 changed during the operation. Finally, 410 patients were included in the statistical  
16  
17 517 analysis.  
18  
19

20 518  
21  
22 519 **Figure 2 Risk factors of EA by metanalysis plot.** The patients' VAS score (OR =  
23  
24 520 2.497; 95% CI: 1.951–3.196), male sex (OR = 3.391; 95% CI: 1.781–6.435), urinary  
25  
26  
27 521 catheter irritation (OR = 7.847; 95% CI: 4.001–15.392), fasting time for solids (OR =  
28  
29  
30 522 1.703; 95% CI: 1.260–2.301), and fasting time for fluids (OR = 1.728; 95% CI:  
31  
32 523 1.263–2.365) were the independent risk factors. VAS: visual analogue scale  
33  
34

35 524  
36  
37 525 **Figure 3 Risk factors of EA by the ROC curve.** The predictive value of risk factors  
38  
39 526 was assessed using the ROC curve. The patients' VAS score (AUC = 0.769, 95% CI:  
40  
41 527 0.718–0.819,  $P < 0.001$ ), fasting time for solids (AUC = 0.753, 95% CI: 0.699–0.807,  
42  
43 528  $P < 0.001$ ) and fasting time for fluids (AUC = 0.768, 95% CI: 0.719–0.816,  $P <$   
44  
45 529 0.001) showed a good predictive effect.  
46  
47  
48  
49

50 530

51 531

52 532

53 533

1  
2  
3  
4  
5 534 **Reporting checklist for cross sectional**  
6  
7  
8  
9 535 **study.**  
10  
11  
12

13 536 Based on the STROBE cross sectional guidelines.  
14  
15

16  
17 537 **Instructions to authors**  
18

19  
20 538 Complete this checklist by entering the page numbers from your manuscript  
21  
22 539 where readers will find each of the items listed below.  
23  
24

25  
26 540 Your article may not currently address all the items on the checklist. Please  
27  
28 541 modify your text to include the missing information. If you are certain that an  
29  
30 542 item does not apply, please write "n/a" and provide a short explanation.  
31  
32

33  
34  
35 543 Upload your completed checklist as an extra file when you submit to a journal.  
36  
37

38  
39 544 In your methods section, say that you used the STROBE cross  
40  
41 545 sectionalreporting guidelines, and cite them as:  
42  
43

44  
45 546 von Elm E, Altman DG, Egger M, Pocock SJ, Gotsche PC, Vandembroucke  
46  
47 547 JP. The Strengthening the Reporting of Observational Studies in  
48  
49 548 Epidemiology (STROBE) Statement: guidelines for reporting observational  
50  
51 549 studies.  
52  
53  
54  
55  
56

|                           |            |                                                                                                 | Number |
|---------------------------|------------|-------------------------------------------------------------------------------------------------|--------|
| <b>Title and abstract</b> |            |                                                                                                 |        |
| Title                     | <u>#1a</u> | Indicate the study's design with a commonly used term in the title or the abstract              | 1      |
| Abstract                  | <u>#1b</u> | Provide in the abstract an informative and balanced summary of what was done and what was found | 3      |
| <b>Introduction</b>       |            |                                                                                                 |        |
| Background / rationale    | <u>#2</u>  | Explain the scientific background and rationale for the investigation being reported            | 5      |
| Objectives                | <u>#3</u>  | State specific objectives, including any prespecified hypotheses                                | 6      |
| <b>Methods</b>            |            |                                                                                                 |        |
| Study design              | <u>#4</u>  | Present key elements of study design early in the paper                                         | NA     |

|    |                      |            |                                             |    |
|----|----------------------|------------|---------------------------------------------|----|
| 1  |                      |            |                                             |    |
| 2  |                      |            |                                             |    |
| 3  |                      |            |                                             |    |
| 4  |                      |            |                                             |    |
| 5  | Setting              | <u>#5</u>  | Describe the setting, locations, and        | 7  |
| 6  |                      |            |                                             |    |
| 7  |                      |            | relevant dates, including periods of        |    |
| 8  |                      |            |                                             |    |
| 9  |                      |            |                                             |    |
| 10 |                      |            | recruitment, exposure, follow-up, and       |    |
| 11 |                      |            |                                             |    |
| 12 |                      |            | data collection                             |    |
| 13 |                      |            |                                             |    |
| 14 |                      |            |                                             |    |
| 15 |                      |            |                                             |    |
| 16 | Eligibility criteria | <u>#6a</u> | Give the eligibility criteria, and the      | 7  |
| 17 |                      |            |                                             |    |
| 18 |                      |            | sources and methods of selection of         |    |
| 19 |                      |            |                                             |    |
| 20 |                      |            | participants.                               |    |
| 21 |                      |            |                                             |    |
| 22 |                      |            |                                             |    |
| 23 |                      |            |                                             |    |
| 24 |                      |            |                                             |    |
| 25 |                      | <u>#7</u>  | Clearly define all outcomes, exposures,     | 8  |
| 26 |                      |            |                                             |    |
| 27 |                      |            | predictors, potential confounders, and      |    |
| 28 |                      |            |                                             |    |
| 29 |                      |            | effect modifiers. Give diagnostic criteria, |    |
| 30 |                      |            |                                             |    |
| 31 |                      |            | if applicable                               |    |
| 32 |                      |            |                                             |    |
| 33 |                      |            |                                             |    |
| 34 |                      |            |                                             |    |
| 35 |                      |            |                                             |    |
| 36 | Data sources /       | <u>#8</u>  | For each variable of interest give sources  | 8  |
| 37 |                      |            |                                             |    |
| 38 | measurement          |            | of data and details of methods of           |    |
| 39 |                      |            |                                             |    |
| 40 |                      |            | assessment (measurement). Describe          |    |
| 41 |                      |            |                                             |    |
| 42 |                      |            | comparability of assessment methods if      |    |
| 43 |                      |            |                                             |    |
| 44 |                      |            | there is more than one group. Give          |    |
| 45 |                      |            |                                             |    |
| 46 |                      |            | information separately for for exposed      |    |
| 47 |                      |            |                                             |    |
| 48 |                      |            | and unexposed groups if applicable.         |    |
| 49 |                      |            |                                             |    |
| 50 |                      |            |                                             |    |
| 51 |                      |            |                                             |    |
| 52 |                      |            |                                             |    |
| 53 |                      |            |                                             |    |
| 54 |                      |            |                                             |    |
| 55 | Bias                 | <u>#9</u>  | Describe any efforts to address potential   | NA |
| 56 |                      |            |                                             |    |
| 57 |                      |            | sources of bias                             |    |
| 58 |                      |            |                                             |    |
| 59 |                      |            |                                             |    |
| 60 |                      |            |                                             |    |

|    |                |             |                                             |      |
|----|----------------|-------------|---------------------------------------------|------|
| 1  |                |             |                                             |      |
| 2  |                |             |                                             |      |
| 3  |                |             |                                             |      |
| 4  |                |             |                                             |      |
| 5  | Study size     | <u>#10</u>  | Explain how the study size was arrived at   | 9    |
| 6  |                |             |                                             |      |
| 7  |                |             |                                             |      |
| 8  | Quantitative   | <u>#11</u>  | Explain how quantitative variables were     | 8    |
| 9  |                |             |                                             |      |
| 10 | variables      |             | handled in the analyses. If applicable,     |      |
| 11 |                |             | describe which groupings were chosen,       |      |
| 12 |                |             |                                             |      |
| 13 |                |             | and why                                     |      |
| 14 |                |             |                                             |      |
| 15 |                |             |                                             |      |
| 16 |                |             |                                             |      |
| 17 |                |             |                                             |      |
| 18 |                |             |                                             |      |
| 19 | Statistical    | <u>#12a</u> | Describe all statistical methods, including | 9-10 |
| 20 |                |             |                                             |      |
| 21 | methods        |             | those used to control for confounding       |      |
| 22 |                |             |                                             |      |
| 23 |                |             |                                             |      |
| 24 |                |             |                                             |      |
| 25 | Statistical    | <u>#12b</u> | Describe any methods used to examine        | 9-10 |
| 26 |                |             |                                             |      |
| 27 | methods        |             | subgroups and interactions                  |      |
| 28 |                |             |                                             |      |
| 29 |                |             |                                             |      |
| 30 |                |             |                                             |      |
| 31 | Statistical    | <u>#12c</u> | Explain how missing data were               | NA   |
| 32 |                |             |                                             |      |
| 33 | methods        |             | addressed                                   |      |
| 34 |                |             |                                             |      |
| 35 |                |             |                                             |      |
| 36 |                |             |                                             |      |
| 37 | Statistical    | <u>#12d</u> | If applicable, describe analytical methods  | NA   |
| 38 |                |             |                                             |      |
| 39 | methods        |             | taking account of sampling strategy         |      |
| 40 |                |             |                                             |      |
| 41 |                |             |                                             |      |
| 42 |                |             |                                             |      |
| 43 | Statistical    | <u>#12e</u> | Describe any sensitivity analyses           | 9-10 |
| 44 |                |             |                                             |      |
| 45 | methods        |             |                                             |      |
| 46 |                |             |                                             |      |
| 47 |                |             |                                             |      |
| 48 |                |             |                                             |      |
| 49 | <b>Results</b> |             |                                             |      |
| 50 |                |             |                                             |      |
| 51 |                |             |                                             |      |
| 52 |                |             |                                             |      |
| 53 | Participants   | <u>#13a</u> | Report numbers of individuals at each       | 11   |
| 54 |                |             |                                             |      |
| 55 |                |             | stage of study—eg numbers potentially       |      |
| 56 |                |             |                                             |      |
| 57 |                |             |                                             |      |
| 58 |                |             |                                             |      |
| 59 |                |             |                                             |      |
| 60 |                |             |                                             |      |

1  
2  
3  
4  
5  
6  
7  
8  
9  
10  
11  
12  
13  
14  
15  
16  
17  
18  
19  
20  
21  
22  
23  
24  
25  
26  
27  
28  
29  
30  
31  
32  
33  
34  
35  
36  
37  
38  
39  
40  
41  
42  
43  
44  
45  
46  
47  
48  
49  
50  
51  
52  
53  
54  
55  
56  
57  
58  
59  
60

|                  |             |                                                                                                                                                                                                                                  |       |
|------------------|-------------|----------------------------------------------------------------------------------------------------------------------------------------------------------------------------------------------------------------------------------|-------|
|                  |             | eligible, examined for eligibility,                                                                                                                                                                                              |       |
|                  |             | confirmed eligible, included in the study,                                                                                                                                                                                       |       |
|                  |             | completing follow-up, and analysed. Give                                                                                                                                                                                         |       |
|                  |             | information separately for for exposed                                                                                                                                                                                           |       |
|                  |             | and unexposed groups if applicable.                                                                                                                                                                                              |       |
| Participants     | <u>#13b</u> | Give reasons for non-participation at<br>each stage                                                                                                                                                                              | 11    |
| Participants     | <u>#13c</u> | Consider use of a flow diagram                                                                                                                                                                                                   | 32    |
| Descriptive data | <u>#14a</u> | Give characteristics of study participants<br>(eg demographic, clinical, social) and<br>information on exposures and potential<br>confounders. Give information separately<br>for exposed and unexposed groups if<br>applicable. | 11    |
| Descriptive data | <u>#14b</u> | Indicate number of participants with<br>missing data for each variable of interest                                                                                                                                               | 11    |
| Outcome data     | <u>#15</u>  | Report numbers of outcome events or<br>summary measures. Give information<br>separately for exposed and unexposed<br>groups if applicable.                                                                                       | 11-13 |



|    |                   |                                                         |       |
|----|-------------------|---------------------------------------------------------|-------|
| 1  |                   |                                                         |       |
| 2  |                   |                                                         |       |
| 3  |                   |                                                         |       |
| 4  |                   |                                                         |       |
| 5  | Main results      | <u>#16a</u> Give unadjusted estimates and, if           | NA    |
| 6  |                   | applicable, confounder-adjusted                         |       |
| 7  |                   | estimates and their precision (eg, 95%                  |       |
| 8  |                   | confidence interval). Make clear which                  |       |
| 9  |                   | confounders were adjusted for and why                   |       |
| 10 |                   | they were included                                      |       |
| 11 |                   |                                                         |       |
| 12 |                   |                                                         |       |
| 13 |                   |                                                         |       |
| 14 |                   |                                                         |       |
| 15 |                   |                                                         |       |
| 16 |                   |                                                         |       |
| 17 |                   |                                                         |       |
| 18 |                   |                                                         |       |
| 19 |                   |                                                         |       |
| 20 |                   |                                                         |       |
| 21 | Main results      | <u>#16b</u> Report category boundaries when             | NA    |
| 22 |                   | continuous variables were categorized                   |       |
| 23 |                   |                                                         |       |
| 24 |                   |                                                         |       |
| 25 |                   |                                                         |       |
| 26 |                   |                                                         |       |
| 27 | Main results      | <u>#16c</u> If relevant, consider translating estimates | NA    |
| 28 |                   | of relative risk into absolute risk for a               |       |
| 29 |                   | meaningful time period                                  |       |
| 30 |                   |                                                         |       |
| 31 |                   |                                                         |       |
| 32 |                   |                                                         |       |
| 33 |                   |                                                         |       |
| 34 |                   |                                                         |       |
| 35 |                   |                                                         |       |
| 36 | Other analyses    | <u>#17</u> Report other analyses done—e.g.,             | NA    |
| 37 |                   | analyses of subgroups and interactions,                 |       |
| 38 |                   | and sensitivity analyses                                |       |
| 39 |                   |                                                         |       |
| 40 |                   |                                                         |       |
| 41 |                   |                                                         |       |
| 42 |                   |                                                         |       |
| 43 |                   |                                                         |       |
| 44 | <b>Discussion</b> |                                                         |       |
| 45 |                   |                                                         |       |
| 46 |                   |                                                         |       |
| 47 |                   |                                                         |       |
| 48 | Key results       | <u>#18</u> Summarise key results with reference to      | 14    |
| 49 |                   | study objectives                                        |       |
| 50 |                   |                                                         |       |
| 51 |                   |                                                         |       |
| 52 |                   |                                                         |       |
| 53 |                   |                                                         |       |
| 54 | Limitations       | <u>#19</u> Discuss limitations of the study, taking     | 18-19 |
| 55 |                   | into account sources of potential bias or               |       |
| 56 |                   |                                                         |       |
| 57 |                   |                                                         |       |
| 58 |                   |                                                         |       |
| 59 |                   |                                                         |       |
| 60 |                   |                                                         |       |

1  
2  
3  
4 imprecision. Discuss both direction and  
5  
6 magnitude of any potential bias.  
7  
8  
9  
10 Interpretation #20 Give a cautious overall interpretation 14-17  
11  
12 considering objectives, limitations,  
13  
14 multiplicity of analyses, results from  
15  
16 similar studies, and other relevant  
17  
18 evidence.  
19  
20  
21  
22

23  
24 Generalisability #21 Discuss the generalisability (external NA  
25  
26 validity) of the study results  
27  
28

## 30 Other

## 32 Information

33  
34  
35  
36 Funding #22 Give the source of funding and the role of 19  
37  
38 the funders for the present study and, if  
39  
40 applicable, for the original study on which  
41  
42 the present article is based  
43  
44  
45  
46

47 550 None The STROBE checklist is distributed under the terms of the Creative  
48  
49 551 Commons Attribution License CC-BY. This checklist can be completed online  
50  
51 552 using <https://www.goodreports.org/>, a tool made by the EQUATOR Network in  
52  
53 553 collaboration with Penelope.ai  
54  
55  
56  
57  
58  
59  
60

1  
2  
3  
4  
5  
6  
7  
8  
9  
10  
11  
12  
13  
14  
15  
16  
17  
18  
19  
20  
21  
22  
23  
24  
25  
26  
27  
28  
29  
30  
31  
32  
33  
34  
35  
36  
37  
38  
39  
40  
41  
42  
43  
44  
45  
46  
47  
48  
49  
50  
51  
52  
53  
54  
55  
56  
57  
58  
59  
60

554

For peer review only

Figure 1 Flow chart of study participants.

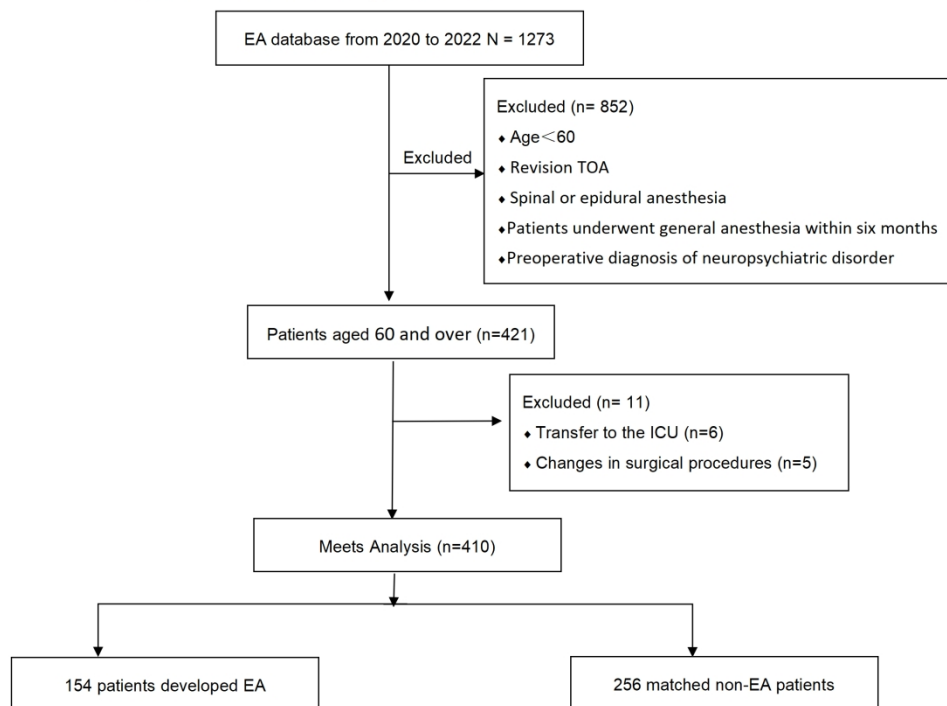

Figure 1 Flow chart of study participants

419x390mm (144 x 144 DPI)

1  
2  
3  
4  
5  
6  
7  
8  
9  
10  
11  
12  
13  
14  
15  
16  
17  
18  
19  
20  
21  
22  
23  
24  
25  
26  
27  
28  
29  
30  
31  
32  
33  
34  
35  
36  
37  
38  
39  
40  
41  
42  
43  
44  
45  
46  
47  
48  
49  
50  
51  
52  
53  
54  
55  
56  
57  
58  
59  
60

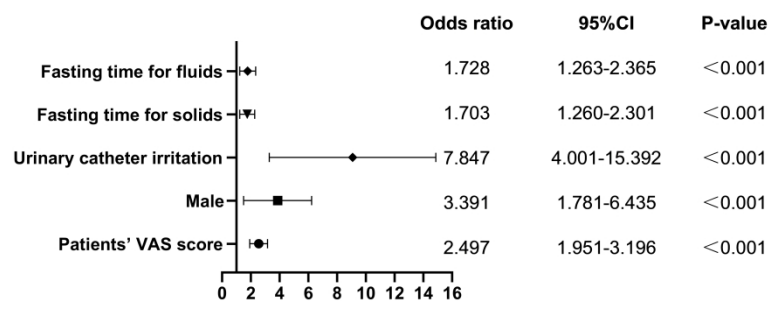

Figure 2 Risk factors of EA by metanalysis plot  
220x73mm (600 x 600 DPI)

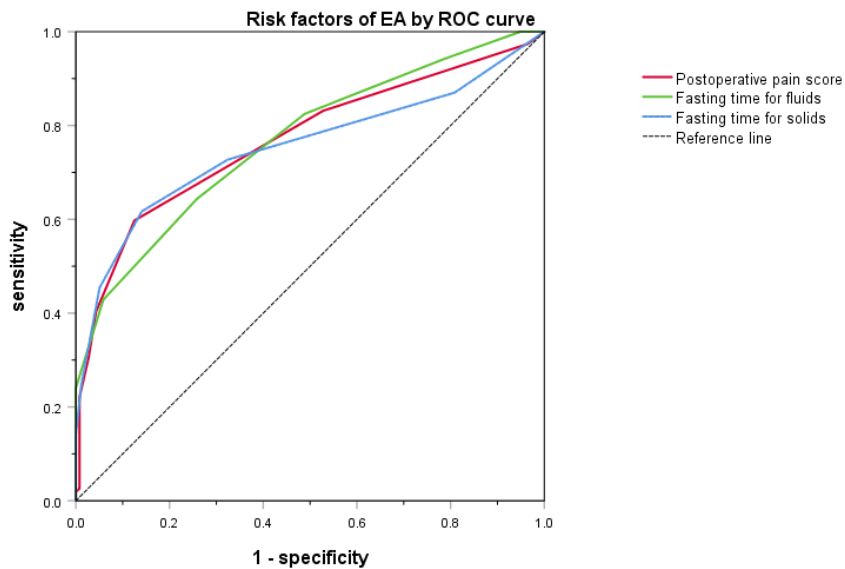

Figure 3 Risk factors of EA by the ROC curve

149x88mm (144 x 144 DPI)

# Reporting checklist for cross sectional study.

Based on the STROBE cross sectional guidelines.

## Instructions to authors

Complete this checklist by entering the page numbers from your manuscript where readers will find each of the items listed below.

Your article may not currently address all the items on the checklist. Please modify your text to include the missing information. If you are certain that an item does not apply, please write "n/a" and provide a short explanation.

Upload your completed checklist as an extra file when you submit to a journal.

In your methods section, say that you used the STROBE cross sectional reporting guidelines, and cite them as:

von Elm E, Altman DG, Egger M, Pocock SJ, Gøtzsche PC, Vandenbroucke JP. The Strengthening the Reporting of Observational Studies in Epidemiology (STROBE) Statement: guidelines for reporting observational studies.

|                           |                     | Reporting Item                                                                                  | Page Number |
|---------------------------|---------------------|-------------------------------------------------------------------------------------------------|-------------|
| <b>Title and abstract</b> |                     |                                                                                                 |             |
| Title                     | <a href="#">#1a</a> | Indicate the study's design with a commonly used term in the title or the abstract              | 1           |
| Abstract                  | <a href="#">#1b</a> | Provide in the abstract an informative and balanced summary of what was done and what was found | 3           |
| <b>Introduction</b>       |                     |                                                                                                 |             |
| Background / rationale    | <a href="#">#2</a>  | Explain the scientific background and rationale for the investigation being reported            | 5           |
| Objectives                | <a href="#">#3</a>  | State specific objectives, including any prespecified hypotheses                                | 6           |
| <b>Methods</b>            |                     |                                                                                                 |             |

|    |                      |                      |                                                                   |      |
|----|----------------------|----------------------|-------------------------------------------------------------------|------|
| 1  | Study design         | <a href="#">#4</a>   | Present key elements of study design early in the paper           | NA   |
| 2  |                      |                      |                                                                   |      |
| 3  | Setting              | <a href="#">#5</a>   | Describe the setting, locations, and relevant dates, including    | 7    |
| 4  |                      |                      | periods of recruitment, exposure, follow-up, and data collection  |      |
| 5  |                      |                      |                                                                   |      |
| 6  |                      |                      |                                                                   |      |
| 7  | Eligibility criteria | <a href="#">#6a</a>  | Give the eligibility criteria, and the sources and methods of     | 7    |
| 8  |                      |                      | selection of participants.                                        |      |
| 9  |                      |                      |                                                                   |      |
| 10 |                      |                      |                                                                   |      |
| 11 |                      | <a href="#">#7</a>   | Clearly define all outcomes, exposures, predictors, potential     | 8    |
| 12 |                      |                      | confounders, and effect modifiers. Give diagnostic criteria, if   |      |
| 13 |                      |                      | applicable                                                        |      |
| 14 |                      |                      |                                                                   |      |
| 15 |                      |                      |                                                                   |      |
| 16 | Data sources /       | <a href="#">#8</a>   | For each variable of interest give sources of data and details of | 8    |
| 17 | measurement          |                      | methods of assessment (measurement). Describe                     |      |
| 18 |                      |                      | comparability of assessment methods if there is more than one     |      |
| 19 |                      |                      | group. Give information separately for for exposed and            |      |
| 20 |                      |                      | unexposed groups if applicable.                                   |      |
| 21 |                      |                      |                                                                   |      |
| 22 |                      |                      |                                                                   |      |
| 23 |                      |                      |                                                                   |      |
| 24 | Bias                 | <a href="#">#9</a>   | Describe any efforts to address potential sources of bias         | NA   |
| 25 |                      |                      |                                                                   |      |
| 26 |                      |                      |                                                                   |      |
| 27 | Study size           | <a href="#">#10</a>  | Explain how the study size was arrived at                         | 9    |
| 28 |                      |                      |                                                                   |      |
| 29 | Quantitative         | <a href="#">#11</a>  | Explain how quantitative variables were handled in the            | 8    |
| 30 | variables            |                      | analyses. If applicable, describe which groupings were chosen,    |      |
| 31 |                      |                      | and why                                                           |      |
| 32 |                      |                      |                                                                   |      |
| 33 |                      |                      |                                                                   |      |
| 34 | Statistical          | <a href="#">#12a</a> | Describe all statistical methods, including those used to control | 9-10 |
| 35 | methods              |                      | for confounding                                                   |      |
| 36 |                      |                      |                                                                   |      |
| 37 |                      |                      |                                                                   |      |
| 38 | Statistical          | <a href="#">#12b</a> | Describe any methods used to examine subgroups and                | 9-10 |
| 39 | methods              |                      | interactions                                                      |      |
| 40 |                      |                      |                                                                   |      |
| 41 |                      |                      |                                                                   |      |
| 42 | Statistical          | <a href="#">#12c</a> | Explain how missing data were addressed                           | NA   |
| 43 | methods              |                      |                                                                   |      |
| 44 |                      |                      |                                                                   |      |
| 45 |                      |                      |                                                                   |      |
| 46 | Statistical          | <a href="#">#12d</a> | If applicable, describe analytical methods taking account of      | NA   |
| 47 | methods              |                      | sampling strategy                                                 |      |
| 48 |                      |                      |                                                                   |      |
| 49 |                      |                      |                                                                   |      |
| 50 | Statistical          | <a href="#">#12e</a> | Describe any sensitivity analyses                                 | 9-10 |
| 51 | methods              |                      |                                                                   |      |
| 52 |                      |                      |                                                                   |      |
| 53 |                      |                      |                                                                   |      |
| 54 | <b>Results</b>       |                      |                                                                   |      |
| 55 |                      |                      |                                                                   |      |
| 56 | Participants         | <a href="#">#13a</a> | Report numbers of individuals at each stage of study—eg           | 11   |
| 57 |                      |                      | numbers potentially eligible, examined for eligibility, confirmed |      |
| 58 |                      |                      |                                                                   |      |
| 59 |                      |                      |                                                                   |      |
| 60 |                      |                      |                                                                   |      |



eligible, included in the study, completing follow-up, and analysed. Give information separately for for exposed and unexposed groups if applicable.

|    |                   |                      |                                                                        |
|----|-------------------|----------------------|------------------------------------------------------------------------|
| 1  |                   |                      |                                                                        |
| 2  |                   |                      |                                                                        |
| 3  |                   |                      |                                                                        |
| 4  |                   |                      |                                                                        |
| 5  | Participants      | <a href="#">#13b</a> | Give reasons for non-participation at each stage 11                    |
| 6  |                   |                      |                                                                        |
| 7  | Participants      | <a href="#">#13c</a> | Consider use of a flow diagram 32                                      |
| 8  |                   |                      |                                                                        |
| 9  |                   |                      |                                                                        |
| 10 | Descriptive data  | <a href="#">#14a</a> | Give characteristics of study participants (eg demographic, 11         |
| 11 |                   |                      | clinical, social) and information on exposures and potential           |
| 12 |                   |                      | confounders. Give information separately for exposed and               |
| 13 |                   |                      | unexposed groups if applicable.                                        |
| 14 |                   |                      |                                                                        |
| 15 |                   |                      |                                                                        |
| 16 |                   |                      |                                                                        |
| 17 | Descriptive data  | <a href="#">#14b</a> | Indicate number of participants with missing data for each 11          |
| 18 |                   |                      | variable of interest                                                   |
| 19 |                   |                      |                                                                        |
| 20 |                   |                      |                                                                        |
| 21 | Outcome data      | <a href="#">#15</a>  | Report numbers of outcome events or summary measures. 11-13            |
| 22 |                   |                      | Give information separately for exposed and unexposed                  |
| 23 |                   |                      | groups if applicable.                                                  |
| 24 |                   |                      |                                                                        |
| 25 |                   |                      |                                                                        |
| 26 | Main results      | <a href="#">#16a</a> | Give unadjusted estimates and, if applicable, confounder- NA           |
| 27 |                   |                      | adjusted estimates and their precision (eg, 95% confidence             |
| 28 |                   |                      | interval). Make clear which confounders were adjusted for and          |
| 29 |                   |                      | why they were included                                                 |
| 30 |                   |                      |                                                                        |
| 31 |                   |                      |                                                                        |
| 32 |                   |                      |                                                                        |
| 33 | Main results      | <a href="#">#16b</a> | Report category boundaries when continuous variables were NA           |
| 34 |                   |                      | categorized                                                            |
| 35 |                   |                      |                                                                        |
| 36 |                   |                      |                                                                        |
| 37 | Main results      | <a href="#">#16c</a> | If relevant, consider translating estimates of relative risk into NA   |
| 38 |                   |                      | absolute risk for a meaningful time period                             |
| 39 |                   |                      |                                                                        |
| 40 |                   |                      |                                                                        |
| 41 | Other analyses    | <a href="#">#17</a>  | Report other analyses done—e.g., analyses of subgroups and NA          |
| 42 |                   |                      | interactions, and sensitivity analyses                                 |
| 43 |                   |                      |                                                                        |
| 44 | <b>Discussion</b> |                      |                                                                        |
| 45 |                   |                      |                                                                        |
| 46 | Key results       | <a href="#">#18</a>  | Summarise key results with reference to study objectives 14            |
| 47 |                   |                      |                                                                        |
| 48 |                   |                      |                                                                        |
| 49 | Limitations       | <a href="#">#19</a>  | Discuss limitations of the study, taking into account sources of 18-19 |
| 50 |                   |                      | potential bias or imprecision. Discuss both direction and              |
| 51 |                   |                      | magnitude of any potential bias.                                       |
| 52 |                   |                      |                                                                        |
| 53 |                   |                      |                                                                        |
| 54 | Interpretation    | <a href="#">#20</a>  | Give a cautious overall interpretation considering objectives, 14-17   |
| 55 |                   |                      | limitations, multiplicity of analyses, results from similar studies,   |
| 56 |                   |                      | and other relevant evidence.                                           |
| 57 |                   |                      |                                                                        |
| 58 |                   |                      |                                                                        |
| 59 |                   |                      |                                                                        |
| 60 |                   |                      |                                                                        |

1 Generalisability [#21](#) Discuss the generalisability (external validity) of the study NA  
2 results  
3

4  
5 **Other**  
6 **Information**  
7

8  
9 Funding [#22](#) Give the source of funding and the role of the funders for the 19  
10 present study and, if applicable, for the original study on which  
11 the present article is based  
12

13  
14 None The STROBE checklist is distributed under the terms of the Creative Commons Attribution  
15 License CC-BY. This checklist can be completed online using <https://www.goodreports.org/>, a tool  
16 made by the [EQUATOR Network](#) in collaboration with [Penelope.ai](#)  
17  
18  
19  
20  
21  
22  
23  
24  
25  
26  
27  
28  
29  
30  
31  
32  
33  
34  
35  
36  
37  
38  
39  
40  
41  
42  
43  
44  
45  
46  
47  
48  
49  
50  
51  
52  
53  
54  
55  
56  
57  
58  
59  
60

# BMJ Open

## Risk factors for emergence agitation during the awakening period in elderly patients after total joint arthroplasty: a retrospective cohort study

|                                 |                                                                                                                                                                                                                                                                                                                                                                                                                                                               |
|---------------------------------|---------------------------------------------------------------------------------------------------------------------------------------------------------------------------------------------------------------------------------------------------------------------------------------------------------------------------------------------------------------------------------------------------------------------------------------------------------------|
| Journal:                        | <i>BMJ Open</i>                                                                                                                                                                                                                                                                                                                                                                                                                                               |
| Manuscript ID                   | bmjopen-2022-068284.R1                                                                                                                                                                                                                                                                                                                                                                                                                                        |
| Article Type:                   | Original research                                                                                                                                                                                                                                                                                                                                                                                                                                             |
| Date Submitted by the Author:   | 28-Feb-2023                                                                                                                                                                                                                                                                                                                                                                                                                                                   |
| Complete List of Authors:       | Wang, Naigeng; Xi'an Jiaotong University, Department of Anesthesiology, Honghui Hospital<br>Hao, Jianhong; Xi'an Jiaotong University, Department of Anesthesiology, Honghui Hospital<br>Zhang, Jie; Xi'an Jiaotong University, Department of Anesthesiology, Honghui Hospital<br>Du, Jing; Shaanxi University of Chinese Medicine, Second Clinical Medical College<br>luo, zhenguo; Xi'an Jiaotong University, Department of Anesthesiology, Honghui Hospital |
| <b>Primary Subject Heading</b>: | Anaesthesia                                                                                                                                                                                                                                                                                                                                                                                                                                                   |
| Secondary Subject Heading:      | Anaesthesia                                                                                                                                                                                                                                                                                                                                                                                                                                                   |
| Keywords:                       | Anaesthesia in orthopaedics < ANAESTHETICS, Adult anaesthesia < ANAESTHETICS, Adult orthopaedics < ORTHOPAEDIC & TRAUMA SURGERY, Knee < ORTHOPAEDIC & TRAUMA SURGERY, Hip < ORTHOPAEDIC & TRAUMA SURGERY                                                                                                                                                                                                                                                      |
|                                 |                                                                                                                                                                                                                                                                                                                                                                                                                                                               |

SCHOLARONE™  
Manuscripts



I, the Submitting Author has the right to grant and does grant on behalf of all authors of the Work (as defined in the below author licence), an exclusive licence and/or a non-exclusive licence for contributions from authors who are: i) UK Crown employees; ii) where BMJ has agreed a CC-BY licence shall apply, and/or iii) in accordance with the terms applicable for US Federal Government officers or employees acting as part of their official duties; on a worldwide, perpetual, irrevocable, royalty-free basis to BMJ Publishing Group Ltd ("BMJ") its licensees and where the relevant Journal is co-owned by BMJ to the co-owners of the Journal, to publish the Work in this journal and any other BMJ products and to exploit all rights, as set out in our [licence](#).

The Submitting Author accepts and understands that any supply made under these terms is made by BMJ to the Submitting Author unless you are acting as an employee on behalf of your employer or a postgraduate student of an affiliated institution which is paying any applicable article publishing charge ("APC") for Open Access articles. Where the Submitting Author wishes to make the Work available on an Open Access basis (and intends to pay the relevant APC), the terms of reuse of such Open Access shall be governed by a Creative Commons licence – details of these licences and which [Creative Commons](#) licence will apply to this Work are set out in our licence referred to above.

Other than as permitted in any relevant BMJ Author's Self Archiving Policies, I confirm this Work has not been accepted for publication elsewhere, is not being considered for publication elsewhere and does not duplicate material already published. I confirm all authors consent to publication of this Work and authorise the granting of this licence.

1 **Risk factors for emergence agitation during the awakening**  
2 **period in elderly patients after total joint arthroplasty: a**  
3 **retrospective cohort study**

4 Naigeng Wang<sup>1</sup>, Jianhong Hao<sup>1</sup>, Jie Zhang<sup>1</sup>, Jing Du<sup>2</sup>, Zhenguo Luo<sup>1</sup>

5 <sup>1</sup>Department of Anesthesiology, Honghui Hospital, Xi'an Jiaotong University, Xi'an,  
6 Shaanxi Province, China

7 <sup>2</sup>Second Clinical Medical College, Shaanxi University of Chinese Medicine,  
8 Xianyang, Shaanxi Province, China

9 **Email address for each author:**

10 Naigeng Wang: wang17731131252@163.com,

11 Jianhong Hao: sxzyydx123@sina.com,

12 Jie Zhang: 1771362371@qq.com,

13 Jing Du: 365844276@qq.com

14  
15 **Running title:** EA risk factors after TJA

16  
17 **Keywords:** Emergence agitation; Elderly patients; Risk factors; Total joint  
18 arthroplasty

19  
20 **Corresponding author:** Zhenguo Luo

21 Tel: +86-13709147141

1  
2  
3  
4  
5  
6  
7  
8  
9  
10  
11  
12  
13  
14  
15  
16  
17  
18  
19  
20  
21  
22  
23  
24  
25  
26  
27  
28  
29  
30  
31  
32  
33  
34  
35  
36  
37  
38  
39  
40  
41  
42  
43  
44  
45  
46  
47  
48  
49  
50  
51  
52  
53  
54  
55  
56  
57  
58  
59  
60

22 Email: [luozhenguo@stu.xjtu.edu.cn](mailto:luozhenguo@stu.xjtu.edu.cn)

23 Mailing address: Department of Anesthesiology, Honghui Hospital, Xi'an Jiaotong  
24 University, No. 555, Youyi East Road, Xi'an, Shaanxi Province, 710054, China.

25  
26 **IRB number:** 201812001 (Biomedical Research Ethics Committee of Honghui  
27 Hospital)

28 **Clinical trial registration number:** ChiCTR1800020193

29 **Word count: 3198**

For peer review only

1  
2  
3  
4 43 **Abstract**

5  
6 44 **Objectives:** This study aimed to explore the incidence and risk factors for emergence  
7  
8  
9 45 agitation (EA) in elderly patients who underwent total joint arthroplasty (TJA) under  
10  
11  
12 46 general anaesthesia and assess their predictive values.

13  
14 47 **Design:** Single-centre retrospective cohort study.

15  
16  
17 48 **Setting:** A 1,600-bed general tertiary hospital in China.

18  
19 49 **Participants:** This study enrolled 421 elderly patients scheduled for elective primary  
20  
21  
22 50 TJA under general anaesthesia.

23  
24 51 **Primary and Secondary Outcome Measures:** EA was assessed using the Richmond  
25  
26  
27 52 Agitation Sedation Scale during the awakening period after surgery in the  
28  
29  
30 53 post-anaesthesia care unit. Risk factors for EA were identified using univariate and  
31  
32  
33 54 multivariable logistic analyses. The receiver operating characteristic curve (ROC) was  
34  
35  
36 55 used to assess the predictive values of the risk factors for EA.

37  
38 56 **Results:** The incidence of EA in elderly patients who underwent TJA was 37.6%.  
39  
40  
41 57 According to the multivariable logistic analysis, postoperative pain (95% confidence  
42  
43 58 interval [CI]: 1.951–3.196), male sex (95% CI: 1.781–6.435), catheter-related bladder  
44  
45 59 discomfort (CRBD) (95% CI: 4.001–15.392), longer fasting times for solids( 95%  
46  
47  
48 60 CI:1.260–2.301) and fluids (95% CI: 1.263–2.365) were independent risk factors for  
49  
50  
51 61 EA. As shown by the ROC analysis, postoperative pain,fasting times for solids and  
52  
53  
54 62 fluids had good predictive values ,with the area under the ROC curve (AUC) was  
55  
56  
57 63 0.769, 0.753 and 0.768,respectively.

1  
2  
3  
4 64 **Conclusions:** EA is a common complication in elderly patients after TJA. Reducing  
5  
6  
7 65 these risk factors is crucial in preventing or treating EA.  
8  
9  
10 66

11 67 **Keywords:** Emergence agitation; Elderly patients; Risk factors; Total joint  
12  
13  
14 68 arthroplasty  
15  
16  
17 69

18  
19  
20 70 **Strengths and limitations:**

- 21  
22 71 ➤ We investigated the incidence and risk factors for EA in elderly patients after  
23  
24 72 total joint arthroplasty and assessed their predictive values.  
25  
26 73 ➤ This study may provide novel insights for preventing and treating EA by  
27  
28 74 identifying the risk factors for EA in elderly patients and assessing their  
29  
30  
31 75 predictive values.  
32  
33  
34 76 ➤ As a single-centre study, our sample size was relatively small.  
35  
36 77 ➤ This was a single-centre retrospective cohort study; thus, some bias is  
37  
38  
39 78 unavoidable.  
40

41 79 **Trial Registration:** ChiCTR1800020193  
42  
43  
44 80  
45  
46  
47 81  
48  
49  
50  
51  
52  
53  
54  
55  
56  
57  
58  
59  
60



1  
2  
3  
4 82  
5  
6  
78 **Introduction**  
9

10 Emergence agitation (EA), a common complication of the awakening period after  
11 general anaesthesia, refers to a temporary state of mental and motor excitement [1].  
12  
13  
14

15 Clinical features of EA include disorientation, excitation, agitation, and combative  
16 behaviours [2,3]. EA can also increase the risk of wound bleeding or dehiscence,  
17 self-extubation, falling out of bed, and violent behaviour towards staff [4]. It may also  
18 prolong the patient's stay in the post-anaesthesia care unit (PACU) and increase the  
19 demand for medical staff [3], resulting in higher medical costs. The incidence of EA  
20 varies widely, ranging from 0.25% to 90.5%, depending on factors such as age, type  
21 of surgery, assessment tool, and anaesthesia method [5]. However, the exact aetiology  
22 and pathological mechanisms of EA remain unclear [5,6]. Hence, identifying the risk  
23 factors for EA is crucial in preventing and managing this condition.  
24  
25  
26  
27  
28  
29  
30  
31  
32  
33  
34  
35  
36  
37  
38

39 EA has been reported in different age groups following general anaesthesia [5].  
40 Many studies have demonstrated that EA is common in children [2,7-8]. However,  
41 other studies have demonstrated that the elderly are also at a high risk of developing  
42 EA [9]. Unfortunately, there are few reports on EA in the elderly compared with  
43 many studies on EA in children. Owing to the decline in physiological functions with  
44 age, the elderly may be predisposed to EA after surgery, leading to more serious  
45 consequences. Thus, more attention must be paid to EA in elderly patients.  
46  
47  
48  
49  
50  
51  
52  
53  
54  
55  
56  
57  
58  
59  
60

1  
2  
3  
4 102• Osteoarthritis (OA) is the most frequent type of arthritis and affects one in  
5  
6 103 three older people [10]. As society ages, more and more older people experience OA.  
7  
8  
9 104 Total joint arthroplasty (TJA) is a successful treatment protocol for end-stage knee  
10  
11 105 and hip OA [11]. Annually, more than 1 million people undergo TJA in the United  
12  
13  
14 106 States [12]. The demand for TJA surgery is expected to increase substantially in the  
15  
16  
17 107 coming years [13]. However, there are no reports on the incidence of EA after TJA.

18  
19 108 In this study, we retrospectively collected the medical records of 421 elderly  
20  
21  
22 109 patients who underwent general anaesthesia for TJA. We aimed to evaluate the risk  
23  
24  
25 110 factors of postoperative EA in elderly patients, assess the predictive values, and  
26  
27  
28 111 provide guidance for preventing and treating EA during follow-up.  
29  
30  
31  
32  
33  
34  
35  
36  
37  
38  
39  
40  
41  
42  
43  
44  
45  
46  
47  
48  
49  
50  
51  
52  
53  
54  
55  
56  
57  
58  
59  
60

1  
2  
3 113  
4  
56 114 **Materials and methods**  
7  
89  
10 115 *Ethics statement*  
11  
12

13  
14 116 This study was approved by the Biomedical Research Ethics Committee of our  
15  
16 117 hospital (approval no. 201812001), and the trial was registered in the Chinese Clinical  
17  
18 118 Registry (ChiCTR, 1800020193). All methods were performed according to relevant  
19  
20 119 guidelines and regulations. The study obtained consent to gather patients' medical  
21  
22 120 record information through telephonic follow-up.  
23  
24  
25

26  
27  
28 121 *Patients*  
29  
30

31 122 We enrolled 421 patients who underwent TJA under general anaesthesia at our  
32  
33 123 hospital between December 2019 and June 2021. The inclusion criteria  
34  
35 124 included (1) preoperative OA diagnosis, (2) age  $\geq$  60 years, (3) American Society of  
36  
37 125 Anesthesiologists (ASA) physical status I–III, and (4) having undergone scheduled  
38  
39 126 elective primary TJA under general anaesthesia. Patients with any of the following  
40  
41 127 conditions were excluded: revision TJA, spinal or epidural anaesthesia, general  
42  
43 128 anaesthesia within the past 6 months, and preoperative diagnosis of neuropsychiatric  
44  
45 129 disorder.  
46  
47  
48  
49  
50

51  
52  
53 130 *Routine practice of perioperative management*  
54  
55  
56  
57  
58  
59  
60

1  
2  
3  
4 131 Anaesthesia was induced with intravenous midazolam, etomidate, sufentanil, and  
5  
6  
7 132 rocuronium. Tracheal intubation was completed after 2 min. The ultrasound-guided  
8  
9  
10 133 femoral nerve block was performed in patients undergoing total knee replacement,  
11  
12 134 while the ultrasound-guided fascia iliac compartment block was performed in patients  
13  
14 135 undergoing total hip replacement. All 20-ml (0.5%) ropivacaine solutions were  
15  
16  
17 136 infused into the nerve block. Urinary catheterisation was performed in all patients  
18  
19  
20 137 after inducing anaesthesia. Anaesthesia was maintained using intravenous  
21  
22 138 remifentanyl and propofol. Patients were transferred to the PACU after the operation.  
23  
24  
25 139 These patients were extubated in the PACU.

26  
27 140 Speciality nurses assessed all patients in the PACU using a standardised  
28  
29  
30 141 protocol, including the visual analogue scale (VAS), Richmond Agitation Sedation  
31  
32 142 Scale (RASS), and Steward recovery scores. VAS was used for assessing  
33  
34  
35 143 postoperative pain, and intravenous flurbiprofen was administered as an analgesic  
36  
37  
38 144 rescue when the VAS score was  $>4$ . EA was evaluated using the RASS [14], and  
39  
40  
41 145 Table 1 presents the score criteria. Patients with a RASS score  $> 1$  were considered to  
42  
43 146 have EA[14]. Dexmedetomidine was administered in cases of severe agitation (RASS  
44  
45  
46 147 = 4). Patients with ward recovery scores  $> 4$  were transferred to the ward from the  
47  
48 148 PACU.

### 150 ***Data collection***

151 The following patient-related variables were recorded: (1) population data and  
152 medical history, including age, sex, body mass index (BMI), ASA classification,

1  
2  
3  
4 153 education level, and history of heart disease, respiratory disease, hypertension, and  
5  
6 154 diabetes; (2) perioperative clinical information, including operation type and time,  
7  
8  
9 155 body temperature after the surgery, VAS score, catheter-related bladder discomfort  
10  
11 156 (CRBD), preoperative fasting times, intraoperative blood loss, warm treatment,  
12  
13  
14 157 postoperative nausea and vomiting, duration in PACU, RASS score, and severe  
15  
16  
17 158 intraoperative hypotension (mean arterial pressure < 65 mmHg for at least 1 min); and  
18  
19 159 (3) laboratory tests. Preoperative fasting times refers to the period from the last intake  
20  
21  
22 160 of liquids or solids to the beginning of the anaesthesia induction.  
23  
24  
25 161

### 26 27 162 *Statistical analysis and sample size*

28  
29  
30 163 The sample size was calculated using GPower software version 3.1 (Franz Faul,  
31  
32 164 University of Kiel, Kiel, Germany). The effect size was set to 0.3,  $\alpha$  level to 0.05, and  
33  
34  
35 165  $1-\beta$  to 0.85. A sample size of 100 patients was the optimal sample size required to  
36  
37  
38 166 prove the difference between the two groups. Considering the easy acquisition of  
39  
40  
41 167 electronic medical records, we included patients who met the inclusion and exclusion  
42  
43 168 criteria between December 2019 and June 2020.

44  
45 169 Statistical analysis was performed using SPSS version 26.0 (SPSS Inc.,  
46  
47  
48 170 Chicago, IL, USA). Continuous data are presented as the means  $\pm$  standard deviations,  
49  
50  
51 171 and categorical data are presented as numbers and percentages. Independent risk  
52  
53 172 factors were identified using univariate and multivariable logistic regression analyses.  
54  
55  
56 173 The measurement data were assessed for normal and non-normal distributions. Two  
57  
58 174 independent sample t-tests were used to determine the differences between groups for  
59  
60

1  
2  
3  
4 175 continuous variables with a normal distribution. The nonparametric Mann–Whitney U  
5  
6 176 test was used to compare differences between groups for continuous variables with  
7  
8  
9 177 non-normal distributions. Chi-square tests were used to determine differences  
10  
11 178 between groups for categorical data. Variables with  $P < 0.2$  were entered in  
12  
13  
14 179 multivariable logistic regression analysis. A positive stepwise method was used to  
15  
16  
17 180 adjust for multiple risk factors. Each variable was expressed as an odds ratio (OR)  
18  
19 181 with a 95% confidence interval (CI). The predictive value of the risk factors for EA  
20  
21  
22 182 was assessed using the receiver operating characteristic (ROC) curve. The cut-off  
23  
24  
25 183 point was calculated based on the maximum Youden index value. Statistical  
26  
27 184 significance was set at a P value  $< 0.05$ .

28  
29  
30 185

### 31 32 186 ***Patient and public involvement***

33  
34  
35 187 None of the patients were involved in the design, data provision, analysis, or  
36  
37  
38 188 publication of the study.

1  
2  
3  
4 189  
5  
6  
78 **190 Results**9  
10 **191 *General information on the study population***

11  
12  
13 192 In total, 421 patients met the inclusion and exclusion criteria. However, 11  
14  
15 193 patients were excluded from the study; six were transferred to the intensive care unit  
16  
17  
18 194 (ICU) postoperatively, and the surgical protocols of five patients were changed during  
19  
20  
21 195 the operation. Finally, the statistical analysis included 410 patients (Fig. 1). The  
22  
23 196 incidence of EA was 37.6% (n = 154) in 410 patients. All patients (n = 410) were  
24  
25  
26 197 divided into two groups: EA and non-EA. No significant differences were observed  
27  
28  
29 198 between the two groups in age, BMI, ASA classification, education level, and medical  
30  
31 199 history (Table 2). The EA group had a significantly higher proportion of male patients  
32  
33  
34 200 than the non-EA group (P < 0.05).

35  
36  
37  
38  
3940 **202 *Perioperative clinical information and laboratory test***

41  
42 203 Univariate analysis demonstrated significant differences between the EA and  
43  
44 204 non-EA groups in the VAS score for postoperative pain, body temperature after the  
45  
46  
47 205 surgery, CRBD, preoperative fasting times, and length of stay in the PACU.

48  
49 206 Compared with the non-EA group, the VAS score was higher (P < 0.05), body  
50  
51  
52 207 temperature after the surgery was lower (P < 0.05), and the patient's length-of-stay in  
53  
54  
55 208 the PACU and preoperative fasting times were longer in the EA group (P < 0.05).

56  
57 209 Simultaneously, 119 of 154 patients in the EA group had CRBD, while 83 of 256  
58  
59  
60

1  
2  
3  
4 210 patients in the non-EA group experienced CRBD. This variable differed significantly  
5  
6 211 between the two groups ( $P < 0.05$ ). Additionally, no significant differences were  
7  
8  
9 212 observed between the two groups regarding surgery type and time, intraoperative  
10  
11 213 blood loss, intraoperative hypotension, warm treatment, and laboratory tests (Table 3).  
12  
13

14  
15 214

### 16 17 215 ***Multivariable logistic regression analysis***

18  
19 216 Based on the univariate analysis, variables included in the multivariable logistic  
20  
21 217 regression analysis include the VAS score for postoperative pain, male sex, body  
22  
23 218 temperature after the surgery, length-of-stay in the PACU, preoperative fasting times,  
24  
25 219 and CRBD.  
26  
27

28  
29  
30 220 The correlation between the VAS score for postoperative pain, male sex,  
31  
32 221 preoperative fasting times, CRBD, and EA in the TJA could be determined based on  
33  
34 222 multivariable logistic analysis (Fig. 2). The VAS score for postoperative pain (OR =  
35  
36 223 2.497; 95% CI: 1.951–3.196), male sex (OR = 3.391; 95% CI: 1.781–6.435), CRBD  
37  
38 224 (OR = 7.847; 95% CI: 4.001–15.392), fasting times for solids (OR = 1.703; 95% CI:  
39  
40 225 1.260–2.301), and fasting times for fluids (OR = 1.728; 95% CI: 1.263–2.365) were  
41  
42 226 independent risk factors. However, we could not confirm the independence of  
43  
44 227 variables, such as body temperature after the surgery and length-of-stay in the PACU,  
45  
46 228 in the multivariable logistic analysis.  
47  
48  
49  
50

51  
52  
53 229

### 54 55 56 230 ***Results of ROC curves for risk factors***



1  
2  
3  
4 231 The predictive value analysed using the ROC curve is demonstrated in Fig. 3.  
5  
6 232 The area under the ROC curve (AUC) for the VAS score was 0.769, with a cut-off  
7  
8  
9 233 value of 4.0, sensitivity of 60%, and specificity of 87% (95% CI: 0.718–0.819,  $P <$   
10  
11 234 0.001). The AUC of fasting time for solids was 0.753, with a cut-off value of 10.5,  
12  
13  
14 235 sensitivity of 62%, and specificity of 86% (95% CI: 0.699–0.807,  $P <$  0.001). The  
15  
16  
17 236 AUC of fasting time for fluids was 0.768, with a cut-off value of 8.5, sensitivity of  
18  
19  
20 237 64%, and specificity of 74% (95% CI: 0.719–0.816,  $P <$  0.001).

21  
22 238

## 239 **Discussion**

240 This study's results indicated that EA is a common postoperative complication in  
241 patients who underwent general anaesthesia for TJA. Furthermore, this study  
242 identified four risk factors associated with the postoperative period in elderly patients  
243 who underwent TJA, including male sex, preoperative fasting times, CRBD, and  
244 postoperative pain.

245 The incidence of EA was 37.6% in elderly patients who underwent TJA. To our  
246 knowledge, this is the first report on EA in elderly patients who have undergone TJA.  
247 The incidence of EA could only be compared with other types of surgery and other  
248 assessment methods. However, previous studies have indicated that the incidence of  
249 EA varies. A recent prospective study demonstrated that 158 of 1136 adult patients  
250 had EA using the RASS [15]. Xi et al. [9] reported that the incidence of EA in elderly  
251 patients who underwent gastrointestinal surgery was 40% based on the Ricker

1  
2  
3  
4  
5  
6  
7  
8  
9  
10  
11  
12  
13  
14  
15  
16  
17  
18  
19  
20  
21  
22  
23  
24  
25  
26  
27  
28  
29  
30  
31  
32  
33  
34  
35  
36  
37  
38  
39  
40  
41  
42  
43  
44  
45  
46  
47  
48  
49  
50  
51  
52  
53  
54  
55  
56  
57  
58  
59  
60

252 Sedation-Agitation Scale (RSAS). The incidence of EA was approximately 90.5%  
253 because of the negative effects of succinylcholine [16]. These large differences may  
254 be attributed to the types of surgery, anaesthetic management, patient characteristics,  
255 and assessment methods.

256 There are many scales for assessing EA, including the RASS, RSAS, motor  
257 activity assessment scale, and New Sheffield sedation scale. However, the RASS has  
258 excellent reliability and validity in assessing sedation and agitation in the ICU [14].  
259 The reliability and validity of the RASS in the PACU have not been validated;  
260 however, the RASS is easy to use and administer and has discrete criteria [14]. Owing  
261 to these advantages, the RASS was chosen to assess EA in the PACU in this study.  
262 Similarly, Makarem et al. [15] and Xi et al. [9] also chose the RASS to assess EA in  
263 the PACU.

264 Almost all researchers agree that postoperative pain is an independent risk factor  
265 for EA. Many clinical practices suggest that postoperative pain can cause  
266 uncomfortable emotional experiences and lead to several dysregulated behaviours.  
267 Our study demonstrated that the VAS scores of patients in the EA group were higher  
268 than those in the non-EA group, and a postoperative pain VAS score  $\geq 4$  was the  
269 cut-off point for EA. Pain after TJA is common, and several studies have discovered  
270 that more than 50% of patients have suboptimal pain management after total hip  
271 arthroplasty (THA), and 75% of patients undergoing total knee arthroplasty (TKA)  
272 complain of moderate-to-severe pain [17,18]. In this study, 72% (n = 295) of patients  
273 complained of pain, and 5% (n = 21) of patients experienced severe pain, comparable

1  
2  
3  
4 274 to the results of previous reports. Yu et al. [6] found that nearly half of the patients  
5  
6 275 had EA because of insufficient postoperative analgesia. Peripheral nerve blocks  
7  
8  
9 276 (PNBs) provide excellent analgesia. In our study, the femoral nerve block was  
10  
11 277 routinely used in patients undergoing TKA, while the fascia iliaca compartment  
12  
13  
14 278 block was used for THA to improve postoperative analgesia. In our clinical practice,  
15  
16  
17 279 every patient undergoes ultrasound-guided PNB. However, considering anatomic  
18  
19 280 variations and individual characteristics, PNBs may not eliminate pain in patients  
20  
21  
22 281 undergoing TJA, leading to some patients experiencing EA due to postoperative pain.  
23  
24  
25 282 Moreover, sore throat and catheter-related pain should not be ignored because  
26  
27 283 postoperative pain is not only wound related. Based on these findings, we strongly  
28  
29  
30 284 suggest that multimodal analgesia should be performed to benefit patients, especially  
31  
32  
33 285 with preventive analgesia.

34  
35 286 The placement of an indwelling catheter is a common clinical operation in the  
36  
37 287 perioperative period. The collected urine is used for urine measurements and blood  
38  
39  
40 288 volume evaluation. However, patients undergoing urinary catheterisation are prone to  
41  
42  
43 289 CRBD [19], characterised by discomfort confined to the suprapubic region, burning  
44  
45  
46 290 sensation, pain, and urinary urgency and frequency [20,21]. CRBD can occur in  
47  
48  
49 291 47–90% of patients with a urinary catheter [4]. CRBD can increase the incidence of  
50  
51 292 EA and pain sensation after surgery [22]. A retrospective study reported that  
52  
53  
54 293 approximately 10% of patients experienced EA during urological surgery, possibly  
55  
56  
57 294 related to CRBD [23]. In our study, 119 of 410 patients experienced EA due to  
58  
59 295 CRBD. Moreover, the higher incidence of EA may be due to the age of the recruited

1  
2  
3  
4 296 patients because age  $\geq 50$  years was an independent predictor of CRBD [24]. Many  
5  
6 297 researchers have focused on EA associated with CRBD in patients undergoing  
7  
8  
9 298 urological surgery and rarely in patients undergoing TJA. Urinary and indwelling  
10  
11 299 catheters under topical anaesthesia must be removed early, and urinary catheterisation  
12  
13  
14 300 (if possible) avoided to decrease EA associated with CRBD.

15  
16  
17 301       Regarding male patients, this study's conclusion is similar to that of other studies  
18  
19 302 where the male sex was identified as an independent risk factor for EA [24]. This  
20  
21 303 observation could be explained by several factors. Firstly, male patients were  
22  
23 304 high-risk patients with CRBD [24]. Half of all men aged  $\geq 50$  years and over 80% of  
24  
25 305 men aged  $\geq 80$  years have prostatic hyperplasia, which can easily cause discomfort  
26  
27 306 and pain when the catheter tip contacts the bladder triangle on the pubis [25].  
28  
29 307 However, during the awakening period of anaesthesia, male patients especially have  
30  
31 308 difficulty tolerating the discomfort associated with catheters. Furthermore, male  
32  
33 309 patients have low postoperative pain tolerance, requiring more analgesics than female  
34  
35 310 patients [26].

36  
37  
38 311       The relationship between emergence delirium (ED) and fasting times has also  
39  
40 312 been demonstrated. Khanna et al. [27] reported that prolonged preoperative fasting ( $>$   
41  
42 313 6 h) was a risk factor for postoperative ED in children. However, the relationship  
43  
44 314 between preoperative fasting times and EA in elderly patients has not been reported.  
45  
46 315 This study showed that patients in the EA group had a longer preoperative fasting  
47  
48 316 times. Moreover, 10.5 h (fasting times for solids) and 8.6 h (fasting times for fluids)  
49  
50 317 are cut-off points for EA. Prolonged preoperative fasting can cause metabolic,  
51  
52  
53  
54  
55  
56  
57  
58  
59  
60

1  
2  
3  
4 318 physical, and psychological discomfort in patients, eventually leading to EA [28].  
5  
6 319 Prolonged preoperative fasting translates to prolonged preoperative waiting time,  
7  
8  
9 320 leading to patient apprehension and anxiety. Preoperative anxiety is a risk factor for  
10  
11 321 EA [23]. Owing to the numerous patients and the lack of medical resources, patients  
12  
13  
14 322 may undergo surgery later than expected, thereby prolonging the fasting times. Thus,  
15  
16  
17 323 operations to decrease EA and reduce unnecessary fasting times must be reasonably  
18  
19  
20 324 scheduled.

21  
22 325• This study had some limitations. Firstly, we only included elderly patients  
23  
24  
25 326 who had undergone intravenous anaesthesia. Future studies may utilize other methods  
26  
27  
28 327 and anaesthetics. Secondly, this was a single-centre study; therefore, the  
29  
30  
31 328 generalisability of the results was not fully verified. Future multi-centre studies must  
32  
33  
34 329 assess external validity. Lastly, this is a retrospective cohort study; some bias is  
35  
36  
37 330 unavoidable. Future prospective studies must be conducted for further research.  
38  
39

## 40 332 **Conclusion**

41  
42  
43 333 This retrospective study showed that the incidence rate of EA in elderly patients  
44  
45  
46 334 after TJA in the PACU was 37.6%. Postoperative pain, CRBD, male sex, and  
47  
48  
49 335 preoperative fasting duration were independent predictors of EA. The  
50  
51  
52 336 pathophysiological mechanism of EA is unknown; hence, preventing EA is  
53  
54  
55 337 more important than treating it. However, the best choice should be to eliminate and  
56  
57  
58 338 avoid risk factors.

59 339

1  
2  
3  
4  
5  
6  
7  
8  
9  
10  
11  
12  
13  
14  
15  
16  
17  
18  
19  
20  
21  
22  
23  
24  
25  
26  
27  
28  
29  
30  
31  
32  
33  
34  
35  
36  
37  
38  
39  
40  
41  
42  
43  
44  
45  
46  
47  
48  
49  
50  
51  
52  
53  
54  
55  
56  
57  
58  
59  
60

340 **Funding:** This work was supported by the Key Research and Development Program  
341 of Shaanxi, China (2019SF-205, 2022SF-149).

342  
343 **Acknowledgements:** We would like to thank Editage (www.editage.cn) for English  
344 language editing.

345  
346 **Data Statement:** No additional data are available.

347  
348 **Author Contributions:** Zhenguo Luo and Jianhong Hao have made substantial  
349 contributions to the conception or design of the manuscript. Naigeng Wang wrote this  
350 manuscript and made some changes after review. Furthermore, he worked with Jing  
351 Du and Jie Zhang to acquire, analyse, and interpret the data. All authors have  
352 participated in drafting the manuscript, and Zhenguo Luo revised it critically. All  
353 authors contributed equally to the manuscript and read and approved the final version  
354 of the manuscript.

355  
356 **Conflict of interest:** No potential conflict of interest relevant to this article was  
357 reported.

359

360 **References**

- 361 1. Yang X, Hu Z, Peng F, et al. Effects of dexmedetomidine on emergence  
362 agitation and recovery quality among children undergoing surgery under  
363 general anesthesia: a meta-analysis of randomized controlled trials. *Front*  
364 *Pediatr.* 2020;8: 580226.
- 365 2. Shi Y, Zhang X, Sun Y, et al. Emergence agitation after the cleft lip or palate  
366 surgery in pediatric patients: a prospective study. *J Stomatol Oral Maxillofac*  
367 *Surg.* 2021;122(6): 539-543.
- 368 3. Kim H-J, Kim D-K, Kim H-Y, et al. Risk factors of emergence agitation in  
369 adults undergoing general anesthesia for nasal surgery. *Clin Exp*  
370 *Otorhinolaryngol.* 2015;8(1): 46-51.
- 371 4. Zhou H, Pan Y, Liu C, et al. Emergence agitation after intraoperative  
372 neurolytic celiac plexus block with alcohol: a case report. *BMC Anesthesiol.*  
373 2021;21(1): 204.
- 374 5. Lee SJ, Sung TY. Emergence agitation: current knowledge and unresolved  
375 questions. *Korean J Anesthesiol.* 2020;73(6):471-485.
- 376 6. Yu D, Chai W, Sun X, Yao L. Emergence agitation in adults: risk factors in  
377 2,000 patients. *Can J Anaesth.* 2010;57(9):843-8.
- 378 7. Smessaert A, Schehr CA, Artusio JF. Observations in the immediate  
379 postanaesthesia period. II. Mode of recovery. *Br J Anaesth.* 1960;32: 181-185.

- 1  
2  
3  
4 380 8. Eckenhoff JE, Kneale DH, Dripps RD. The incidence and etiology of  
5  
6 381 postanesthetic excitement. A clinical survey. *Anesthesiology*. 1961;22:  
7  
8  
9 382 667-673.  
10  
11 383 9. Mei X, Tong J. The plasma levels of brain-derived neurotrophic factor are  
12  
13 384 positively associated with emergence agitation in the elderly after  
14  
15 385 gastrointestinal surgery. *J Anesth*. 2016;30(5): 811-816.  
16  
17 386 10. Hawker GA. Osteoarthritis is a serious disease. *Clin Exp Rheumatol*. 2019;37  
18  
19 387 Suppl 120(5): 3-6.  
20  
21 388 11. Niu R, Egan C, Fang C, Duru N, Alley MC, Freccero DM, Smith EL. Total  
22  
23 389 joint arthroplasty in homeless patients at an urban safety net hospital. *J Am*  
24  
25 390 *Acad Orthop Surg*. 2022;30(11):523-527.  
26  
27 391 12. Katz JN, Arant KR, Loeser RF. Diagnosis and treatment of hip and knee  
28  
29 392 osteoarthritis: a review. *JAMA*. 2021;325(6): 568-578.  
30  
31 393 13. Zhou Q, Zhou X, Zhang Y, et al. Predictors of postoperative delirium in  
32  
33 394 elderly patients following total hip and knee arthroplasty: a systematic review  
34  
35 395 and meta-analysis. *BMC Musculoskelet Disord*. 2021;22(1): 945  
36  
37 396 14. Sessler CN, Gosnell MS, Grap MJ, et al. The Richmond Agitation-Sedation  
38  
39 397 Scale: validity and reliability in adult intensive care unit patients. *Am J Respir*  
40  
41 398 *Crit Care Med*. 2002;166(10): 1338-1344.  
42  
43 399 15. Makarem J, Larijani AH, Eslami B, et al. Risk factors of inadequate  
44  
45 400 emergence following general anesthesia with an emphasis on patients with  
46  
47 401 substance dependence history. *Korean J Anesthesiol*. 2020;73(4): 302-310.  
48  
49  
50  
51  
52  
53  
54  
55  
56  
57  
58  
59  
60



- 1  
2  
3  
4 402 16. Lee S-J, Sung T-Y, Cho C-K. Comparison of emergence agitation between  
5  
6 403 succinylcholine and rocuronium-sugammadex in adults following closed  
7  
8 404 reduction of a nasal bone fracture: a prospective randomized controlled trial.  
9  
10  
11 405 *BMC Anesthesiol.* 2019;19(1): 228.
- 12  
13  
14 406 17. De Luca ML, Ciccarello M, Martorana M, et al. Pain monitoring and  
15  
16 407 management in a rehabilitation setting after total joint replacement. *Medicine*  
17  
18 408 *(Baltimore)*. 2018;97(40): e12484.
- 19  
20  
21 409 18. Erlenwein J, Müller M, Falla D, et al. Clinical relevance of persistent  
22  
23 410 postoperative pain after total hip replacement - a prospective observational  
24  
25 411 cohort study. *J Pain Res.* 2017;10: 2183-2193.
- 26  
27  
28 412 19. Jang EB, Hong SH, Kim KS, et al. Catheter-related bladder discomfort: how  
29  
30 413 can we manage it? *Int Neurorol J.* 2020;24(4): 324-331.
- 31  
32  
33 414 20. Bach H, Kaasby K, Sørensen A, et al. Incidence and severity of  
34  
35 415 catheter-related bladder discomfort among nonurological adult patients in a  
36  
37 416 postanesthesia care unit. *J Perianesth Nurs.* 2020;35(1): 29-33.
- 38  
39  
40 417 21. Kim D-H, Park J-Y, Yu J, et al. Intravenous lidocaine for the prevention of  
41  
42 418 postoperative catheter-related bladder discomfort in male patients undergoing  
43  
44 419 transurethral resection of bladder tumors: a randomized, double-blind,  
45  
46 420 controlled trial. *Anesth Analg.* 2020;131(1): 220-227.
- 47  
48  
49 421 22. Binhas M, Motamed C, Hawajri N, et al. Predictors of catheter-related bladder  
50  
51 422 discomfort in the post-anaesthesia care unit. *Ann Fr Anesth Reanim.*  
52  
53 423 2011;30(2): 122-125.

- 1  
2  
3  
4 424 23. Kim H-C, Kim E, Jeon Y-T, et al. Postanaesthetic emergence agitation in adult  
5  
6 425 patients after general anaesthesia for urological surgery. *J Int Med Res*.  
7  
8  
9 426 2015;43(2): 226-235.  
10  
11 427 24. Li SY, Song LP, Ma YS, et al. Predictors of catheter-related bladder  
12  
13  
14 428 discomfort after gynaecological surgery. *BMC Anesthesiol*. 2020;20(1): 97.  
15  
16  
17 429 25. Chughtai B, Forde JC, Thomas DDM, et al. Benign prostatic hyperplasia.  
18  
19 430 *Nat Rev Dis Primers*. 2016;2: 16031.  
20  
21  
22 431 26. Tsui SL, Tong WN, Irwin M, et al. The efficacy, applicability and side-effects  
23  
24 432 of postoperative intravenous patient-controlled morphine analgesia: an audit of  
25  
26  
27 433 1233 Chinese patients. *Anaesth Intensive Care*. 1996;24(6): 658-664.  
28  
29  
30 434 27. Khanna P, Saini K, Sinha R, et al Correlation between duration of  
31  
32 435 preoperative fasting and emergence delirium in pediatric patients undergoing  
33  
34 436 ophthalmic examination under anesthesia: A prospective observational study.  
35  
36  
37 437 *Paediatr Anaesth*. 2018;28(6): 547-551.  
38  
39  
40 438 28. Jin Z, Hu J, Ma D. Postoperative delirium: perioperative assessment, risk  
41  
42 439 reduction, and management. *Br J Anaesth*. 2020;125(4): 492-504.  
43  
44  
45 440  
46  
47  
48 441  
49  
50  
51  
52  
53  
54  
55  
56  
57  
58  
59  
60

443

444 **Tables**445 **Table 1 Richmond agitation sedation scale**

| Score | Term              | Description                                                                                  |
|-------|-------------------|----------------------------------------------------------------------------------------------|
| +4    | Combative         | Overtly combative, violent, immediate danger to staff                                        |
| +3    | Very agitated     | Pulls or removes tube(s) or catheter(s); aggressive                                          |
| +2    | Agitated          | Frequent non-purposeful movement; fights ventilator                                          |
| +1    | Restless          | Anxious but movements not aggressive or vigorous                                             |
| 0     | Alert and calm    |                                                                                              |
| -1    | Drowsy            | Not fully alert but has sustained awakening (eye-opening/eye contact) to voice (>10 seconds) |
| -2    | Light sedation    | Briefly awake with eye contact to voice (<10 seconds)                                        |
| -3    | Moderate sedation | Movement or eye opening to voice (but no eye contact)                                        |
| -4    | Deep sedation     | No response to voice, but movement or eye opening to physical stimulation                    |
| -5    | Unarousable       | No response to voice or physical stimulation                                                 |

446

447 **Notes:** Scores of 1 to 4 indicated different levels of agitation, 0 indicated calmness

448 and alertness, and -1 to -5 indicated different levels of sedation.

449

450

451 **Table 2 Population data and medical history**

| <b>Variables</b>                     | <b>Agitation Groups<br/>(n=154)</b> | <b>Non-agitation Groups<br/>(n=256)</b> | <b>P-value</b> |
|--------------------------------------|-------------------------------------|-----------------------------------------|----------------|
| <b>Age</b>                           | 69. 84±6. 53                        | 69. 39±6. 82                            | 0. 238         |
| <b>Male (n, %)</b>                   | 91 (59. 1%)                         | 71 (27. 7%)                             | <0. 001***     |
| <b>BMI (Kg. m<sup>-2</sup>)</b>      | 22. 75±4. 31                        | 23. 17±2. 56                            | 0. 253         |
| <b>ASA classification<br/>(n, %)</b> |                                     |                                         | 0. 221         |
| <b>I</b>                             | 0                                   | 0                                       |                |
| <b>II</b>                            | 118 (76. 6%)                        | 182 (71. 1%)                            |                |
| <b>III</b>                           | 36 (23. 4%)                         | 74 (28. 9%)                             |                |
| <b>Education (n, %)</b>              |                                     |                                         | 0. 412         |
| Illiteracy                           | 42 (27. 3%)                         | 55 (21. 5%)                             |                |
| Primary school                       | 45 (29. 2%)                         | 93 (36. 3%)                             |                |
| Secondary school                     | 59 (38. 3%)                         | 96 (37. 5%)                             |                |
| University and above                 | 8 (5. 2%)                           | 12 (4. 7%)                              |                |
| <b>Medical history (n,<br/>%)</b>    |                                     |                                         |                |
| <b>Heart disease</b>                 |                                     |                                         | 0. 816         |
| Yes                                  | 72 (46. 8%)                         | 113 (44. 1%)                            |                |
| No                                   | 82 (53. 2%)                         | 143 (55. 9%)                            |                |

| Variables            | Agitation Groups<br>(n=154) | Non-agitation Groups<br>(n=256) | P-value |
|----------------------|-----------------------------|---------------------------------|---------|
| Respiratory diseases |                             |                                 | 0. 760  |
| Yes                  | 80 (51. 9%)                 | 129 (50. 4%)                    |         |
| No                   | 74 (48. 1%)                 | 127 (49. 6%)                    |         |
| Hypertension         |                             |                                 | 0. 981  |
| Yes                  | 78 (50. 6%)                 | 131 (51. 2%)                    |         |
| No                   | 76 (49. 4%)                 | 125 (48. 8%)                    |         |
| Diabetes             |                             |                                 |         |
| Yes                  | 71 (46. 1%)                 | 119 (46. 5%)                    | 0. 940  |
| No                   | 83 (53. 9%)                 | 137 (53. 5%)                    |         |

452 **Notes:** Clinical information of patients were analysed using univariate analysis.

453 Continuous data are presented as the means  $\pm$  standard deviations, while categorical

454 data are presented as numbers and percentages. \*P-value, differences between

455 patients in the two groups. \*P<0. 05, \*\*\*P<0. 001. ASA: American Society of

456 Anesthesiologists; BMI: body mass index.

457

458

459

460

461

462 **Table 3 Patients' perioperative clinical information and agitation-related**  
 463 **laboratory test indicators**

| <b>Variables</b>                                       | <b>Agitation<br/>Groups<br/>(n=154)</b> | <b>Non-agitation<br/>Groups<br/>(n=256)</b> | <b>P-value</b> |
|--------------------------------------------------------|-----------------------------------------|---------------------------------------------|----------------|
| <b>Operation type (n, %)</b>                           |                                         |                                             | 0. 524         |
| TKA                                                    | 85 (55. 2%)                             | 133 (52. 0%)                                |                |
| THA                                                    | 69 (44. 8%)                             | 123 (48. 0%)                                |                |
| <b>Operation time in TKA (min)</b>                     | 144. 42±59. 96                          | 143. 91±46. 19                              | 0. 236         |
| <b>Operation time in THA (min)</b>                     | 139. 96±64. 60                          | 128. 48±58. 98                              | 0. 213         |
| <b>VAS score for postoperative pain</b>                | 3. 50±2. 13                             | 1. 67±1. 02                                 | <0. 001***     |
| <b>Body temperature at the end of the surgery (°C)</b> | 35. 87±0. 73                            | 36. 03±0. 94                                | 0. 037*        |
| <b>CRBD (n, %)</b>                                     |                                         |                                             | <0. 001***     |
| Yes                                                    | 119(77. 3%)                             | 83 (32. 4%)                                 |                |
| No                                                     | 35(22. 7%)                              | 173(67. 6%)                                 |                |
| <b>Preoperative fasting times (h)</b>                  |                                         |                                             |                |
| fasting times for solids                               | 10. 19±1. 05                            | 8. 76±0. 88                                 | <0. 001***     |
| fasting times for fluids                               | 4. 81±1. 14                             | 2. 99±0. 92                                 | <0. 001***     |
| <b>Intraoperative blood loss (ml)</b>                  | 217. 26±30. 18                          | 200. 32±27. 48                              | 0. 224         |

464

| <b>Variables</b>                                    | <b>Agitation Groups<br/>(n=154)</b> | <b>Non-agitation Groups<br/>(n=256)</b> | <b>P-value</b> |
|-----------------------------------------------------|-------------------------------------|-----------------------------------------|----------------|
| <b>Severe Intraoperative hypotension<br/>(n, %)</b> |                                     |                                         | 0.261          |
| Yes                                                 | 14 (9.1%)                           | 15 (5.9%)                               |                |
| No                                                  | 140 (90.9%)                         | 241 (94.1%)                             |                |
| <b>Postoperative nausea and vomiting<br/>(n, %)</b> |                                     |                                         | 0.332          |
| Yes                                                 | 67 (43.5%)                          | 124 (48.4%)                             |                |
| No                                                  | 87 (56.5%)                          | 132 (51.6%)                             |                |
| <b>The duration in PACU (min)</b>                   | 32.83±14.07                         | 31.00±8.57                              | 0.025*         |
| <b>Warm treatment (n, %)</b>                        |                                     |                                         | 0.880          |
| Yes                                                 | 68 (44.2%)                          | 115 (44.9%)                             |                |
| No                                                  | 86 (55.8%)                          | 141 (55.1%)                             |                |
| <b>Laboratory testing</b>                           |                                     |                                         |                |
| HCO <sub>3</sub> <sup>-</sup> (mmol/L)              | 22.3±1.86                           | 24.7±1.33                               | 0.291          |
| PaCO <sub>2</sub> (mmHg)                            | 38.61±1.42                          | 39.44±1.58                              | 0.318          |
| PaO <sub>2</sub> (mmHg)                             | 89.52±1.74                          | 90.17±1.55                              | 0.282          |
| pH                                                  | 7.447±0.32                          | 7.426±0.41                              | 0.263          |
| Hb levels (g/L)                                     | 16.6±1.93                           | 17.1±1.85                               | 0.274          |

465 **Notes:** Patients' perioperative clinical information and agitation-related laboratory

1  
2  
3  
4  
5  
6  
7  
8  
9  
10  
11  
12  
13  
14  
15  
16  
17  
18  
19  
20  
21  
22  
23  
24  
25  
26  
27  
28  
29  
30  
31  
32  
33  
34  
35  
36  
37  
38  
39  
40  
41  
42  
43  
44  
45  
46  
47  
48  
49  
50  
51  
52  
53  
54  
55  
56  
57  
58  
59  
60

466 test indicators were analysed using univariate analysis. Continuous data are presented  
467 as means  $\pm$  standard deviations, while categorical data are presented as numbers and  
468 percentages. \*P-value, differences between patients in the two groups. \*P<0. 05,  
469 \*\*\*P<0. 001. TKA: total knee arthroplasty; THA: total hip arthroplasty; VAS: visual  
470 analogue scale; CRBD: catheter-related bladder discomfort; PACU: post-anaesthesia  
471 care unit.

For peer review only



1  
2  
3  
4 488 **Figure legends**

5  
6 489 **Figure 1 Flow chart of study participants.** In total, 421 patients met the inclusion  
7  
8  
9 490 and exclusion criteria. However, 11 patients were excluded from the study; six were  
10  
11  
12 491 transferred to the ICU postoperatively, and the surgical protocols of five were  
13  
14  
15 492 changed during the operation. Finally, the statistical analysis included 410 patients.  
16

17 493  
18  
19 494 **Figure 2 Risk factors for EA using metanalysis plot.** The VAS score for  
20  
21  
22 495 postoperative pain (OR = 2.497; 95% CI: 1.951–3.196), male sex (OR = 3.391; 95%  
23  
24  
25 496 CI: 1.781–6.435), urinary catheter irritation (OR = 7.847; 95% CI: 4.001–15.392),  
26  
27  
28 497 fasting times for solids (OR = 1.703; 95% CI: 1.260–2.301), and fasting times for  
29  
30  
31 498 fluids (OR = 1.728; 95% CI: 1.263–2.365) were the independent risk factors.  
32

33 499  
34  
35 500 **Figure 3 Risk factors for EA using the ROC curve.** Predictive values of risk factors  
36  
37  
38 501 were assessed using the ROC curve. The VAS score for postoperative pain (AUC =  
39  
40  
41 502 0.769, 95% CI: 0.718–0.819,  $P < 0.001$ ), fasting times for solids (AUC = 0.753, 95%  
42  
43  
44 503 CI: 0.699–0.807,  $P < 0.001$ ) and fasting times for fluids (AUC = 0.768, 95% CI:  
45  
46  
47 504 0.719–0.816,  $P < 0.001$ ) demonstrated good predictive effects.  
48

49 505

50 506

51 507

52 508

53 509

1  
2  
3  
4 510 **Reporting checklist for cross sectional study.**

5  
6  
7 511 Based on the STROBE cross sectional guidelines.

8  
9  
10 512 **Instructions to authors**

11  
12  
13 513 Complete this checklist by entering the page numbers from your manuscript  
14 514 where readers will find each of the items listed below.

15  
16  
17  
18 515 Your article may not currently address all the items on the checklist. Please  
19 516 modify your text to include the missing information. If you are certain that an  
20 517 item does not apply, please write "n/a" and provide a short explanation.

21  
22  
23  
24 518 Upload your completed checklist as an extra file when you submit to a journal.

25  
26  
27 519 In your methods section, say that you used the STROBE cross  
28 520 sectionalreporting guidelines, and cite them as:

29  
30  
31 521 von Elm E, Altman DG, Egger M, Pocock SJ, Gotsche PC, Vandembroucke  
32 522 JP. The Strengthening the Reporting of Observational Studies in Epidemiology  
33 523 (STROBE) Statement: guidelines for reporting observational studies.

|  |          |                                                                                                     | Page   |
|--|----------|-----------------------------------------------------------------------------------------------------|--------|
|  |          | Reporting Item                                                                                      | Number |
|  |          | Title and abstract                                                                                  |        |
|  | Title    | #1a Indicate the study's design with a commonly used term in the title or the abstract              | 1      |
|  | Abstract | #1b Provide in the abstract an informative and balanced summary of what was done and what was found | 3      |

1  
2  
3  
4 **Introduction**  
5

6

7 Background / #2 Explain the scientific background and 5  
8 rationale for the investigation being  
9 reported

10

11

12 Objectives #3 State specific objectives, including any 6  
13 prespecified hypotheses  
14

15

16

17 Methods

18

19 Study design #4 Present key elements of study design NA  
20 early in the paper  
21

22

23

24 Setting #5 Describe the setting, locations, and 7  
25 relevant dates, including periods of  
26 recruitment, exposure, follow-up, and  
27 data collection  
28

29

30

31 Eligibility criteria #6a Give the eligibility criteria, and the 7  
32 sources and methods of selection of  
33 participants.  
34

35

36

37 #7 Clearly define all outcomes, exposures, 8  
38 predictors, potential confounders, and  
39 effect modifiers. Give diagnostic criteria, if  
40 applicable  
41

42

43

44

45 Data sources / #8 For each variable of interest give sources 8  
46 measurement of data and details of methods of  
47 assessment (measurement). Describe  
48 comparability of assessment methods if  
49 there is more than one group. Give  
50 information separately for for exposed  
51 and unexposed groups if applicable.  
52

53

54

55

56

57 Bias #9 Describe any efforts to address potential 8-9  
58  
59  
60

|    |              |      |                                               |      |
|----|--------------|------|-----------------------------------------------|------|
|    |              |      | sources of bias                               |      |
| 1  |              |      |                                               |      |
| 2  |              |      |                                               |      |
| 3  |              |      |                                               |      |
| 4  |              |      |                                               |      |
| 5  |              |      |                                               |      |
| 6  | Study size   | #10  | Explain how the study size was arrived at     | 9    |
| 7  |              |      |                                               |      |
| 8  | Quantitative | #11  | Explain how quantitative variables were       | 8    |
| 9  | variables    |      | handled in the analyses. If applicable,       |      |
| 10 |              |      | describe which groupings were chosen,         |      |
| 11 |              |      | and why                                       |      |
| 12 |              |      |                                               |      |
| 13 |              |      |                                               |      |
| 14 |              |      |                                               |      |
| 15 |              |      |                                               |      |
| 16 | Statistical  | #12a | Describe all statistical methods, including   | 9-10 |
| 17 | methods      |      | those used to control for confounding         |      |
| 18 |              |      |                                               |      |
| 19 |              |      |                                               |      |
| 20 | Statistical  | #12b | Describe any methods used to examine          | 9-10 |
| 21 | methods      |      | subgroups and interactions                    |      |
| 22 |              |      |                                               |      |
| 23 |              |      |                                               |      |
| 24 | Statistical  | #12c | Explain how missing data were                 | NA   |
| 25 | methods      |      | addressed                                     |      |
| 26 |              |      |                                               |      |
| 27 |              |      |                                               |      |
| 28 | Statistical  | #12d | If applicable, describe analytical methods    | NA   |
| 29 | methods      |      | taking account of sampling strategy           |      |
| 30 |              |      |                                               |      |
| 31 |              |      |                                               |      |
| 32 |              |      |                                               |      |
| 33 | Statistical  | #12e | Describe any sensitivity analyses             | 9-10 |
| 34 | methods      |      |                                               |      |
| 35 |              |      |                                               |      |
| 36 |              |      |                                               |      |
| 37 | Results      |      |                                               |      |
| 38 |              |      |                                               |      |
| 39 |              |      |                                               |      |
| 40 | Participants | #13a | Report numbers of individuals at each         | 11   |
| 41 |              |      | stage of study—eg numbers potentially         |      |
| 42 |              |      | eligible, examined for eligibility, confirmed |      |
| 43 |              |      | eligible, included in the study, completing   |      |
| 44 |              |      | follow-up, and analysed. Give information     |      |
| 45 |              |      | separately for for exposed and                |      |
| 46 |              |      | unexposed groups if applicable.               |      |
| 47 |              |      |                                               |      |
| 48 |              |      |                                               |      |
| 49 |              |      |                                               |      |
| 50 |              |      |                                               |      |
| 51 |              |      |                                               |      |
| 52 | Participants | #13b | Give reasons for non-participation at         | 11   |
| 53 |              |      | each stage                                    |      |
| 54 |              |      |                                               |      |
| 55 |              |      |                                               |      |
| 56 | Participants | #13c | Consider use of a flow diagram                | 32   |
| 57 |              |      |                                               |      |
| 58 |              |      |                                               |      |
| 59 |              |      |                                               |      |
| 60 |              |      |                                               |      |

|    |                  |      |                                                |
|----|------------------|------|------------------------------------------------|
| 1  |                  |      |                                                |
| 2  |                  |      |                                                |
| 3  |                  |      |                                                |
| 4  | Descriptive data | #14a | Give characteristics of study participants 11  |
| 5  |                  |      | (eg demographic, clinical, social) and         |
| 6  |                  |      | information on exposures and potential         |
| 7  |                  |      | confounders. Give information separately       |
| 8  |                  |      | for exposed and unexposed groups if            |
| 9  |                  |      | applicable.                                    |
| 10 |                  |      |                                                |
| 11 | Descriptive data | #14b | Indicate number of participants with 11        |
| 12 |                  |      | missing data for each variable of interest     |
| 13 |                  |      |                                                |
| 14 |                  |      |                                                |
| 15 | Outcome data     | #15  | Report numbers of outcome events or 11-13      |
| 16 |                  |      | summary measures. Give information             |
| 17 |                  |      | separately for exposed and unexposed           |
| 18 |                  |      | groups if applicable.                          |
| 19 |                  |      |                                                |
| 20 | Main results     | #16a | Give unadjusted estimates and, if 12           |
| 21 |                  |      | applicable, confounder-adjusted                |
| 22 |                  |      | estimates and their precision (eg, 95%         |
| 23 |                  |      | confidence interval). Make clear which         |
| 24 |                  |      | confounders were adjusted for and why          |
| 25 |                  |      | they were included                             |
| 26 |                  |      |                                                |
| 27 | Main results     | #16b | Report category boundaries when NA             |
| 28 |                  |      | continuous variables were categorized          |
| 29 |                  |      |                                                |
| 30 | Main results     | #16c | If relevant, consider translating estimates NA |
| 31 |                  |      | of relative risk into absolute risk for a      |
| 32 |                  |      | meaningful time period                         |
| 33 |                  |      |                                                |
| 34 | Other analyses   | #17  | Report other analyses done—e.g., NA            |
| 35 |                  |      | analyses of subgroups and interactions,        |
| 36 |                  |      | and sensitivity analyses                       |
| 37 |                  |      |                                                |
| 38 | Discussion       |      |                                                |
| 39 |                  |      |                                                |
| 40 |                  |      |                                                |
| 41 |                  |      |                                                |
| 42 | Key results      | #18  | Summarise key results with reference to 14     |
| 43 |                  |      | study objectives                               |
| 44 |                  |      |                                                |
| 45 |                  |      |                                                |
| 46 |                  |      |                                                |
| 47 |                  |      |                                                |
| 48 |                  |      |                                                |
| 49 |                  |      |                                                |
| 50 |                  |      |                                                |
| 51 |                  |      |                                                |
| 52 |                  |      |                                                |
| 53 |                  |      |                                                |
| 54 |                  |      |                                                |
| 55 |                  |      |                                                |
| 56 |                  |      |                                                |
| 57 |                  |      |                                                |
| 58 |                  |      |                                                |
| 59 |                  |      |                                                |
| 60 |                  |      |                                                |

1  
2  
3  
4  
5  
6  
7  
8  
9  
10  
11  
12  
13  
14  
15  
16  
17  
18  
19  
20  
21  
22  
23  
24  
25  
26  
27  
28  
29  
30  
31  
32  
33  
34  
35  
36  
37  
38  
39  
40  
41  
42  
43  
44  
45  
46  
47  
48  
49  
50  
51  
52  
53  
54  
55  
56  
57  
58  
59  
60

|                   |     |                                                                                                                                                                  |       |
|-------------------|-----|------------------------------------------------------------------------------------------------------------------------------------------------------------------|-------|
| Limitations       | #19 | Discuss limitations of the study, taking into account sources of potential bias or imprecision. Discuss both direction and magnitude of any potential bias.      | 18-19 |
| Interpretation    | #20 | Give a cautious overall interpretation considering objectives, limitations, multiplicity of analyses, results from similar studies, and other relevant evidence. | 14-17 |
| Generalisability  | #21 | Discuss the generalisability (external validity) of the study results                                                                                            | 18    |
| Other Information |     |                                                                                                                                                                  |       |
| Funding           | #22 | Give the source of funding and the role of the funders for the present study and, if applicable, for the original study on which the present article is based    | 19    |

524 None The STROBE checklist is distributed under the terms of the Creative  
 525 Commons Attribution License CC-BY. This checklist can be completed online  
 526 using <https://www.goodreports.org/>, a tool made by the EQUATOR Network in  
 527 collaboration with Penelope.ai

528

1  
2  
3  
4  
5  
6  
7  
8  
9  
10  
11  
12  
13  
14  
15  
16  
17  
18  
19  
20  
21  
22  
23  
24  
25  
26  
27  
28  
29  
30  
31  
32  
33  
34  
35  
36  
37  
38  
39  
40  
41  
42  
43  
44  
45  
46  
47  
48  
49  
50  
51  
52  
53  
54  
55  
56  
57  
58  
59  
60

**Figure 1** Flow chart of study participants.

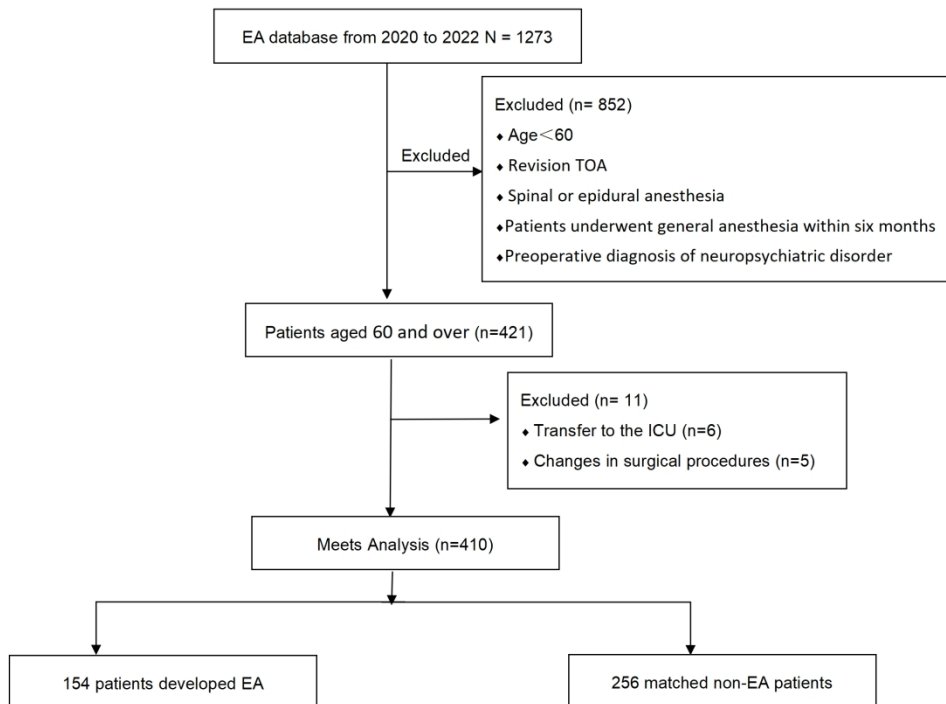

Figure 1 Flow chart of study participants

419x390mm (144 x 144 DPI)

1  
2  
3  
4  
5  
6  
7  
8  
9  
10  
11  
12  
13  
14  
15  
16  
17  
18  
19  
20  
21  
22  
23  
24  
25  
26  
27  
28  
29  
30  
31  
32  
33  
34  
35  
36  
37  
38  
39  
40  
41  
42  
43  
44  
45  
46  
47  
48  
49  
50  
51  
52  
53  
54  
55  
56  
57  
58  
59  
60

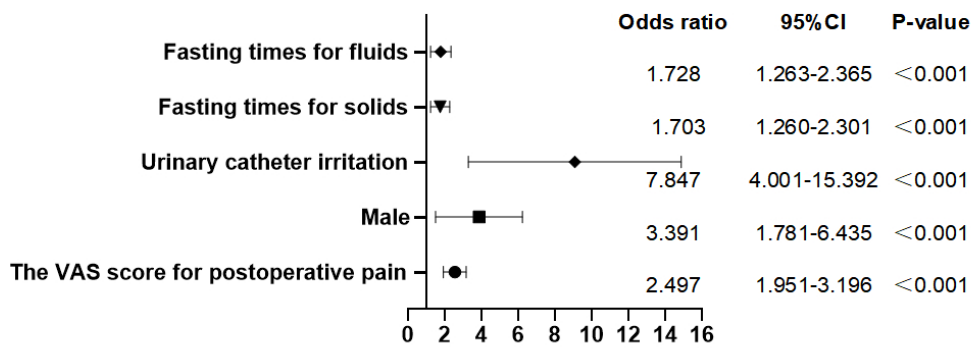

Figure 2 Risk factors of EA by metanalysis plot

436x179mm (57 x 57 DPI)



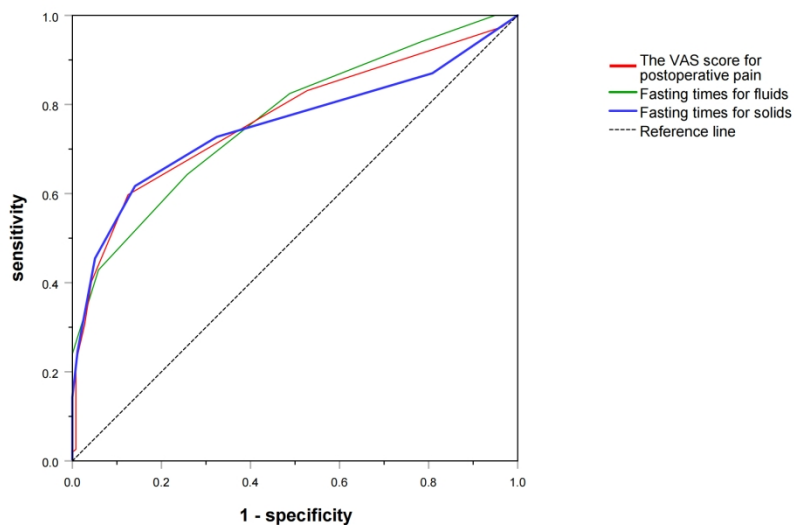

Figure 3 Risk factors of EA by the ROC curve

1178x667mm (57 x 57 DPI)

## Reporting checklist for cross sectional study.

Based on the STROBE cross sectional guidelines.

### Instructions to authors

Complete this checklist by entering the page numbers from your manuscript where readers will find each of the items listed below.

Your article may not currently address all the items on the checklist. Please modify your text to include the missing information. If you are certain that an item does not apply, please write "n/a" and provide a short explanation.

Upload your completed checklist as an extra file when you submit to a journal.

In your methods section, say that you used the STROBE cross sectional reporting guidelines, and cite them as:

von Elm E, Altman DG, Egger M, Pocock SJ, Gøtzsche PC, Vandenbroucke JP. The Strengthening the Reporting of Observational Studies in Epidemiology (STROBE) Statement: guidelines for reporting observational studies.

|  |                    |                                                                                                     | Page<br>Number |
|--|--------------------|-----------------------------------------------------------------------------------------------------|----------------|
|  | Reporting Item     |                                                                                                     |                |
|  | Title and abstract |                                                                                                     |                |
|  | Title              | #1a Indicate the study's design with a commonly used term in the title or the abstract              | 1              |
|  | Abstract           | #1b Provide in the abstract an informative and balanced summary of what was done and what was found | 3              |

1  
2  
3  
4 **Introduction**  
5

6

|    |                      |     |                                                |     |
|----|----------------------|-----|------------------------------------------------|-----|
| 7  | Background /         | #2  | Explain the scientific background and          | 5   |
| 8  | rationale            |     | rationale for the investigation being          |     |
| 9  |                      |     | reported                                       |     |
| 10 |                      |     |                                                |     |
| 11 |                      |     |                                                |     |
| 12 | Objectives           | #3  | State specific objectives, including any       | 6   |
| 13 |                      |     | prespecified hypotheses                        |     |
| 14 |                      |     |                                                |     |
| 15 |                      |     |                                                |     |
| 16 | Methods              |     |                                                |     |
| 17 |                      |     |                                                |     |
| 18 |                      |     |                                                |     |
| 19 | Study design         | #4  | Present key elements of study design           | NA  |
| 20 |                      |     | early in the paper                             |     |
| 21 |                      |     |                                                |     |
| 22 |                      |     |                                                |     |
| 23 | Setting              | #5  | Describe the setting, locations, and           | 7   |
| 24 |                      |     | relevant dates, including periods of           |     |
| 25 |                      |     | recruitment, exposure, follow-up, and          |     |
| 26 |                      |     | data collection                                |     |
| 27 |                      |     |                                                |     |
| 28 |                      |     |                                                |     |
| 29 |                      |     |                                                |     |
| 30 |                      |     |                                                |     |
| 31 | Eligibility criteria | #6a | Give the eligibility criteria, and the         | 7   |
| 32 |                      |     | sources and methods of selection of            |     |
| 33 |                      |     | participants.                                  |     |
| 34 |                      |     |                                                |     |
| 35 |                      |     |                                                |     |
| 36 |                      |     |                                                |     |
| 37 |                      | #7  | Clearly define all outcomes, exposures,        | 8   |
| 38 |                      |     | predictors, potential confounders, and         |     |
| 39 |                      |     | effect modifiers. Give diagnostic criteria, if |     |
| 40 |                      |     | applicable                                     |     |
| 41 |                      |     |                                                |     |
| 42 |                      |     |                                                |     |
| 43 |                      |     |                                                |     |
| 44 |                      |     |                                                |     |
| 45 | Data sources /       | #8  | For each variable of interest give sources     | 8   |
| 46 | measurement          |     | of data and details of methods of              |     |
| 47 |                      |     | assessment (measurement). Describe             |     |
| 48 |                      |     | comparability of assessment methods if         |     |
| 49 |                      |     | there is more than one group. Give             |     |
| 50 |                      |     | information separately for for exposed         |     |
| 51 |                      |     | and unexposed groups if applicable.            |     |
| 52 |                      |     |                                                |     |
| 53 |                      |     |                                                |     |
| 54 |                      |     |                                                |     |
| 55 |                      |     |                                                |     |
| 56 |                      |     |                                                |     |
| 57 | Bias                 | #9  | Describe any efforts to address potential      | 8-9 |
| 58 |                      |     | sources of bias                                |     |
| 59 |                      |     |                                                |     |
| 60 |                      |     |                                                |     |

|    |                  |      |                                               |      |
|----|------------------|------|-----------------------------------------------|------|
| 1  |                  |      |                                               |      |
| 2  |                  |      |                                               |      |
| 3  |                  |      |                                               |      |
| 4  | Study size       | #10  | Explain how the study size was arrived at     | 9    |
| 5  |                  |      |                                               |      |
| 6  |                  |      |                                               |      |
| 7  | Quantitative     | #11  | Explain how quantitative variables were       | 8    |
| 8  | variables        |      | handled in the analyses. If applicable,       |      |
| 9  |                  |      | describe which groupings were chosen,         |      |
| 10 |                  |      | and why                                       |      |
| 11 |                  |      |                                               |      |
| 12 |                  |      |                                               |      |
| 13 |                  |      |                                               |      |
| 14 | Statistical      | #12a | Describe all statistical methods, including   | 9-10 |
| 15 | methods          |      | those used to control for confounding         |      |
| 16 |                  |      |                                               |      |
| 17 |                  |      |                                               |      |
| 18 | Statistical      | #12b | Describe any methods used to examine          | 9-10 |
| 19 | methods          |      | subgroups and interactions                    |      |
| 20 |                  |      |                                               |      |
| 21 |                  |      |                                               |      |
| 22 |                  |      |                                               |      |
| 23 | Statistical      | #12c | Explain how missing data were addressed       | NA   |
| 24 | methods          |      |                                               |      |
| 25 |                  |      |                                               |      |
| 26 |                  |      |                                               |      |
| 27 | Statistical      | #12d | If applicable, describe analytical methods    | NA   |
| 28 | methods          |      | taking account of sampling strategy           |      |
| 29 |                  |      |                                               |      |
| 30 |                  |      |                                               |      |
| 31 | Statistical      | #12e | Describe any sensitivity analyses             | 9-10 |
| 32 | methods          |      |                                               |      |
| 33 |                  |      |                                               |      |
| 34 |                  |      |                                               |      |
| 35 | Results          |      |                                               |      |
| 36 |                  |      |                                               |      |
| 37 |                  |      |                                               |      |
| 38 | Participants     | #13a | Report numbers of individuals at each         | 11   |
| 39 |                  |      | stage of study—eg numbers potentially         |      |
| 40 |                  |      | eligible, examined for eligibility, confirmed |      |
| 41 |                  |      | eligible, included in the study, completing   |      |
| 42 |                  |      | follow-up, and analysed. Give information     |      |
| 43 |                  |      | separately for for exposed and unexposed      |      |
| 44 |                  |      | groups if applicable.                         |      |
| 45 |                  |      |                                               |      |
| 46 |                  |      |                                               |      |
| 47 |                  |      |                                               |      |
| 48 |                  |      |                                               |      |
| 49 |                  |      |                                               |      |
| 50 |                  |      |                                               |      |
| 51 | Participants     | #13b | Give reasons for non-participation at each    | 11   |
| 52 |                  |      | stage                                         |      |
| 53 |                  |      |                                               |      |
| 54 |                  |      |                                               |      |
| 55 | Participants     | #13c | Consider use of a flow diagram                | 32   |
| 56 |                  |      |                                               |      |
| 57 |                  |      |                                               |      |
| 58 | Descriptive data | #14a | Give characteristics of study participants    | 11   |
| 59 |                  |      | (eg demographic, clinical, social) and        |      |
| 60 |                  |      |                                               |      |

1  
2  
3  
4  
5  
6  
7  
8  
9  
10  
11  
12  
13  
14  
15  
16  
17  
18  
19  
20  
21  
22  
23  
24  
25  
26  
27  
28  
29  
30  
31  
32  
33  
34  
35  
36  
37  
38  
39  
40  
41  
42  
43  
44  
45  
46  
47  
48  
49  
50  
51  
52  
53  
54  
55  
56  
57  
58  
59  
60

|                  |      |                                                                                                                                                                                                          |       |
|------------------|------|----------------------------------------------------------------------------------------------------------------------------------------------------------------------------------------------------------|-------|
|                  |      | information on exposures and potential confounders. Give information separately for exposed and unexposed groups if applicable.                                                                          |       |
| Descriptive data | #14b | Indicate number of participants with missing data for each variable of interest                                                                                                                          | 11    |
| Outcome data     | #15  | Report numbers of outcome events or summary measures. Give information separately for exposed and unexposed groups if applicable.                                                                        | 11-13 |
| Main results     | #16a | Give unadjusted estimates and, if applicable, confounder-adjusted estimates and their precision (eg, 95% confidence interval). Make clear which confounders were adjusted for and why they were included | 12    |
| Main results     | #16b | Report category boundaries when continuous variables were categorized                                                                                                                                    | NA    |
| Main results     | #16c | If relevant, consider translating estimates of relative risk into absolute risk for a meaningful time period                                                                                             | NA    |
| Other analyses   | #17  | Report other analyses done—e.g., analyses of subgroups and interactions, and sensitivity analyses                                                                                                        | NA    |
| Discussion       |      |                                                                                                                                                                                                          |       |
| Key results      | #18  | Summarise key results with reference to study objectives                                                                                                                                                 | 14    |
| Limitations      | #19  | Discuss limitations of the study, taking into account sources of potential bias or                                                                                                                       | 18-19 |

|    |                  |                                                |       |
|----|------------------|------------------------------------------------|-------|
| 1  |                  |                                                |       |
| 2  |                  |                                                |       |
| 3  |                  |                                                |       |
| 4  |                  | imprecision. Discuss both direction and        |       |
| 5  |                  | magnitude of any potential bias.               |       |
| 6  |                  |                                                |       |
| 7  |                  |                                                |       |
| 8  | Interpretation   | #20 Give a cautious overall interpretation     | 14-17 |
| 9  |                  | considering objectives, limitations,           |       |
| 10 |                  | multiplicity of analyses, results from         |       |
| 11 |                  | similar studies, and other relevant            |       |
| 12 |                  | evidence.                                      |       |
| 13 |                  |                                                |       |
| 14 |                  |                                                |       |
| 15 |                  |                                                |       |
| 16 |                  |                                                |       |
| 17 | Generalisability | #21 Discuss the generalisability (external     | 18    |
| 18 |                  | validity) of the study results                 |       |
| 19 |                  |                                                |       |
| 20 |                  |                                                |       |
| 21 | Other            |                                                |       |
| 22 | Information      |                                                |       |
| 23 |                  |                                                |       |
| 24 |                  |                                                |       |
| 25 | Funding          | #22 Give the source of funding and the role of | 19    |
| 26 |                  | the funders for the present study and, if      |       |
| 27 |                  | applicable, for the original study on which    |       |
| 28 |                  | the present article is based                   |       |
| 29 |                  |                                                |       |
| 30 |                  |                                                |       |
| 31 |                  |                                                |       |
| 32 |                  |                                                |       |

None The STROBE checklist is distributed under the terms of the Creative Commons Attribution License CC-BY. This checklist can be completed online using <https://www.goodreports.org/>, a tool made by the EQUATOR Network in collaboration with Penelope.ai

# BMJ Open

## Risk factors for emergence agitation during the awakening period in elderly patients after total joint arthroplasty: a retrospective cohort study

|                                 |                                                                                                                                                                                                                                                                                                                                                                                                                                                               |
|---------------------------------|---------------------------------------------------------------------------------------------------------------------------------------------------------------------------------------------------------------------------------------------------------------------------------------------------------------------------------------------------------------------------------------------------------------------------------------------------------------|
| Journal:                        | <i>BMJ Open</i>                                                                                                                                                                                                                                                                                                                                                                                                                                               |
| Manuscript ID                   | bmjopen-2022-068284.R2                                                                                                                                                                                                                                                                                                                                                                                                                                        |
| Article Type:                   | Original research                                                                                                                                                                                                                                                                                                                                                                                                                                             |
| Date Submitted by the Author:   | 03-Apr-2023                                                                                                                                                                                                                                                                                                                                                                                                                                                   |
| Complete List of Authors:       | Wang, Naigeng; Xi'an Jiaotong University, Department of Anesthesiology, Honghui Hospital<br>Hao, Jianhong; Xi'an Jiaotong University, Department of Anesthesiology, Honghui Hospital<br>Zhang, Jie; Xi'an Jiaotong University, Department of Anesthesiology, Honghui Hospital<br>Du, Jing; Shaanxi University of Chinese Medicine, Second Clinical Medical College<br>luo, zhenguo; Xi'an Jiaotong University, Department of Anesthesiology, Honghui Hospital |
| <b>Primary Subject Heading</b>: | Anaesthesia                                                                                                                                                                                                                                                                                                                                                                                                                                                   |
| Secondary Subject Heading:      | Anaesthesia                                                                                                                                                                                                                                                                                                                                                                                                                                                   |
| Keywords:                       | Anaesthesia in orthopaedics < ANAESTHETICS, Adult anaesthesia < ANAESTHETICS, Adult orthopaedics < ORTHOPAEDIC & TRAUMA SURGERY, Knee < ORTHOPAEDIC & TRAUMA SURGERY, Hip < ORTHOPAEDIC & TRAUMA SURGERY                                                                                                                                                                                                                                                      |
|                                 |                                                                                                                                                                                                                                                                                                                                                                                                                                                               |

SCHOLARONE™  
Manuscripts

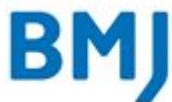

I, the Submitting Author has the right to grant and does grant on behalf of all authors of the Work (as defined in the below author licence), an exclusive licence and/or a non-exclusive licence for contributions from authors who are: i) UK Crown employees; ii) where BMJ has agreed a CC-BY licence shall apply, and/or iii) in accordance with the terms applicable for US Federal Government officers or employees acting as part of their official duties; on a worldwide, perpetual, irrevocable, royalty-free basis to BMJ Publishing Group Ltd ("BMJ") its licensees and where the relevant Journal is co-owned by BMJ to the co-owners of the Journal, to publish the Work in this journal and any other BMJ products and to exploit all rights, as set out in our [licence](#).

The Submitting Author accepts and understands that any supply made under these terms is made by BMJ to the Submitting Author unless you are acting as an employee on behalf of your employer or a postgraduate student of an affiliated institution which is paying any applicable article publishing charge ("APC") for Open Access articles. Where the Submitting Author wishes to make the Work available on an Open Access basis (and intends to pay the relevant APC), the terms of reuse of such Open Access shall be governed by a Creative Commons licence – details of these licences and which [Creative Commons](#) licence will apply to this Work are set out in our licence referred to above.

Other than as permitted in any relevant BMJ Author's Self Archiving Policies, I confirm this Work has not been accepted for publication elsewhere, is not being considered for publication elsewhere and does not duplicate material already published. I confirm all authors consent to publication of this Work and authorise the granting of this licence.



1 **Risk factors for emergence agitation during the awakening**  
2 **period in elderly patients after total joint arthroplasty: a**  
3 **retrospective cohort study**

4 Naigeng Wang<sup>1</sup>, Jianhong Hao<sup>1</sup>, Jie Zhang<sup>1</sup>, Jing Du<sup>2</sup>, Zhenguo Luo<sup>1</sup>

5 <sup>1</sup>Department of Anesthesiology, Honghui Hospital, Xi'an Jiaotong University, Xi'an,  
6 Shaanxi Province, China

7 <sup>2</sup>Second Clinical Medical College, Shaanxi University of Chinese Medicine,  
8 Xianyang, Shaanxi Province, China

9 **Email address for each author:**

10 Naigeng Wang: wang17731131252@163.com,

11 Jianhong Hao: sxzyydx123@sina.com,

12 Jie Zhang: 1771362371@qq.com,

13 Jing Du: 365844276@qq.com

14  
15 **Running title:** EA risk factors after TJA

16  
17 **Keywords:** Emergence agitation; Elderly patients; Risk factors; Total joint  
18 arthroplasty

19  
20 **Corresponding author:** Zhenguo Luo

21 Tel: +86-13709147141

1  
2  
3  
4 22 Email: [luozhenguo@stu.xjtu.edu.cn](mailto:luozhenguo@stu.xjtu.edu.cn)  
5

6 23 Mailing address: Department of Anesthesiology, Honghui Hospital, Xi'an Jiaotong  
7  
8  
9 24 University, No. 555, Youyi East Road, Xi'an, Shaanxi Province, 710054, China.  
10

11 25  
12  
13  
14 26 **IRB number:** 201812001 (Biomedical Research Ethics Committee of Honghui  
15  
16  
17 Hospital)  
18

19 28 **Clinical trial registration number:** ChiCTR1800020193  
20

21  
22 29 **Word count: 3083**  
23  
24  
25

26 30  
27

28 31  
29

30 32  
31

32 33  
33

34 34  
35

36 35  
37

38 36  
39

40 37  
41

42 38  
43

44 39  
45

46 40  
47

48 41  
49

50 42  
51  
52  
53  
54  
55  
56  
57  
58  
59  
60

1  
2  
3  
4 43 **Abstract**

5  
6 44 **Objectives:** This study aimed to explore the incidence and risk factors for emergence  
7  
8  
9 45 agitation (EA) in elderly patients who underwent total joint arthroplasty (TJA) under  
10  
11  
12 46 general anaesthesia, and to assess their predictive values.

13  
14 47 **Design:** Single-centre retrospective cohort study.

15  
16  
17 48 **Setting:** A 1,600-bed general tertiary hospital in China.

18  
19 49 **Participants:** This study enrolled 421 elderly patients scheduled for elective primary  
20  
21  
22 50 TJA under general anaesthesia.

23  
24 51 **Primary and Secondary Outcome Measures:** EA was assessed using the Richmond  
25  
26  
27 52 Agitation Sedation Scale during the awakening period after surgery in the  
28  
29  
30 53 postanaesthesia care unit(PACU). Risk factors for EA were identified using univariate  
31  
32  
33 54 and multivariable logistic analyses. The receiver operating characteristic curve (ROC)  
34  
35  
36 55 was used to assess the predictive values of the risk factors for EA.

37  
38 56 **Results:** The incidence of EA in elderly patients who underwent TJA was 37.6%.  
39  
40  
41 57 According to the multivariable logistic analysis, postoperative pain (95% confidence  
42  
43 58 interval [CI]: 1.951–3.196), male sex (95% CI: 1.781–6.435), catheter-related bladder  
44  
45 59 discomfort (CRBD) (95% CI: 4.001–15.392), and longer fasting times for solids (95%  
46  
47  
48 60 CI: 1.260–2.301) and fluids (95% CI: 1.263–2.365) were independent risk factors for  
49  
50  
51 61 EA. As shown by the ROC analysis, postoperative pain and fasting times for solids  
52  
53  
54 62 and fluids had good predictive values,with areas under the ROC curve (AUCs)  
55  
56  
57 63 equalling 0.769, 0.753 and 0.768,respectively.

1  
2  
3  
4 64 **Conclusions:** EA is a common complication after TJA in elderly patients. Some  
5  
6 65 risk factors, including postoperative pain, male sex, CRBD, and longer fasting times,  
7  
8  
9 66 can increase the incidence of EA. These risk factors may contribute to identifying  
10  
11 67 high-risk patients, which facilitates the development of effective strategies to prevent  
12  
13  
14 68 and treat EA.  
15  
16  
17 69  
18  
19  
20 70  
21  
22 71 **Keywords:** Emergence agitation; Elderly patients; Risk factors; Total joint  
23  
24 72 arthroplasty  
25  
26  
27 73  
28  
29  
30 74 **Strengths and limitations:**  
31

- 32 75 ➤ We performed a retrospective study of risk factors for EA in elderly patients after  
33  
34 76 TJA.  
35  
36 77 ➤ This work was a single-centre retrospective study, and the generalizability of the  
37  
38 78 results is weak.  
39  
40 79 ➤ Only patients with one category of arthritis were studied.  
41  
42 80  
43  
44  
45 81  
46  
47  
48 82  
49  
50  
51  
52  
53  
54  
55  
56  
57  
58  
59  
60

## 83 Introduction

84 Emergence agitation (EA), a common complication during the awakening period  
85 after general anaesthesia, refers to a temporary state of mental and motor excitement  
86 [1]. Clinical features of EA include disorientation, excitation, agitation, and  
87 combative behaviours [2,3]. The incidence of EA in adults varies from 4.7% to 74%  
88 [4]. EA can also increase the risk of wound bleeding or dehiscence, self-extubation,  
89 falling out of bed, and violent behaviour towards staff [5]. It may also prolong the  
90 patient's stay in the PACU and increase the demand for medical staff, resulting in  
91 higher medical costs [6]. Elderly individuals are one of the main population groups  
92 affected by EA [7]. Cardiovascular and cerebrovascular diseases are common in  
93 elderly individuals [8]. EA may have more serious adverse consequences for elderly  
94 patients[5]..

95 Total joint arthroplasty (TJA) is a successful treatment protocol for end-stage  
96 knee and hip OA [9]. Annually, more than 1 million people undergo TJA in the  
97 United States [10]. As the population ages, the demand for TJA surgery is expected  
98 to increase substantially in the coming years [11]. Most patients suffer from  
99 moderate-to-severe pain after TJA[12], which is one of the risk factors for EA in  
100 adult patients[3,13-14]. The incidence and risk factors for EA in adults vary  
101 depending on the surgery[15-17]; however, reports on the incidence and risk factors  
102 for EA after TJA are lacking.

1  
2  
3  
4 103 In this study, we retrospectively collected the medical records of 421 elderly  
5  
6 104 patients who underwent general anaesthesia for TJA. We aimed to determine the  
7  
8  
9 105 incidence and risk factors of postoperative EA in elderly patients, in order to assess  
10  
11  
12 106 the predictive values, and provide guidance for preventing and treating EA.  
13  
14 107

15  
16  
17  
18  
19  
20  
21  
22  
23  
24  
25  
26  
27  
28  
29  
30  
31  
32  
33  
34  
35  
36  
37  
38  
39  
40  
41  
42  
43  
44  
45  
46  
47  
48  
49  
50  
51  
52  
53  
54  
55  
56  
57  
58  
59  
60

For peer review only

## 108 **Materials and methods**

### 109 *Ethics statement*

110 This study was approved by the Biomedical Research Ethics Committee of our  
111 hospital (approval no. 201812001), and the trial was registered in the Chinese Clinical  
112 Registry (ChiCTR, 1800020193). All methods were performed according to relevant  
113 guidelines and regulations. The study obtained consent to gather patients' medical  
114 record information through telephone follow-up.

### 115 *Patients*

116 We enrolled 421 patients who underwent TJA under general anaesthesia at our  
117 hospital from December 2019 to June 2021. Inclusion criteria  
118 included (1) preoperative OA diagnosis, (2) age  $\geq$  60 years, (3) American Society of  
119 Anaesthesiologists (ASA) physical status I–III, and (4) having undergone scheduled  
120 elective primary TJA under general anaesthesia. Patients with any of the following  
121 conditions were excluded: revision TJA, spinal or epidural anaesthesia, general  
122 anaesthesia within the past 6 months, and preoperative diagnosis of neuropsychiatric  
123 disorder.

### 124 *Routine practice of perioperative management*

125 Anaesthesia was induced with intravenous midazolam, etomidate, sufentanil, and  
126 rocuronium. Tracheal intubation was completed after 2 min. Ultrasound-guided

1  
2  
3  
4 127 femoral nerve block (FNB) was performed in patients undergoing total knee  
5  
6 128 replacement (TKA), while ultrasound-guided fascia iliac compartment block (FICB)  
7  
8  
9 129 was performed in patients undergoing total hip replacement (THA). All 20-ml (0.5%)  
10  
11 130 ropivacaine solutions were infused into the nerve block. Urinary catheterisation was  
12  
13  
14 131 performed in all patients after inducing anaesthesia. Anaesthesia was maintained  
15  
16  
17 132 using intravenous remifentanyl and propofol. Patients were transferred to the PACU  
18  
19  
20 133 after the operation. These patients were extubated in the PACU.

21  
22 134 Speciality nurses assessed all patients in the PACU using a standardised  
23  
24 135 protocol, including the visual analogue scale (VAS), Richmond Agitation Sedation  
25  
26 136 Scale (RASS), and Steward recovery scores. VAS was used to assess postoperative  
27  
28 137 pain, and intravenous flurbiprofen was administered as an analgesic rescue when the  
29  
30 138 VAS score was  $> 4$ . EA was evaluated using the RASS [18], and Table 1 presents the  
31  
32 139 score criteria. Patients with a RASS score  $> 1$  were considered to have EA [18].  
33  
34  
35 140 Dexmedetomidine was administered in cases of severe agitation (RASS = 4). Patients  
36  
37 141 with ward recovery scores  $> 4$  were transferred to the ward from the PACU.  
38  
39  
40  
41  
42

### 43 142

#### 44 143 ***Data collection***

45  
46  
47 144 The following patient-related variables were recorded: (1) population data and  
48  
49 145 medical history, including age, sex, body mass index (BMI), ASA classification,  
50  
51 146 education level, history of heart disease, respiratory disease, hypertension, and  
52  
53  
54 147 diabetes; (2) perioperative clinical information, including operation type and times,  
55  
56  
57 148 body temperature after the surgery, VAS score, catheter-related bladder discomfort  
58  
59  
60



1  
2  
3  
4 149 (CRBD), preoperative fasting times, intraoperative blood loss, warm treatment,  
5  
6 150 postoperative nausea and vomiting, duration in PACU, RASS score, and severe  
7  
8  
9 151 intraoperative hypotension (mean arterial pressure < 65 mmHg for at least 1 min); and  
10  
11  
12 152 (3) laboratory tests. Preoperative fasting time refers to the period from the last intake  
13  
14 153 of liquids or solids to the beginning of anaesthesia induction.  
15  
16

17 154

### 19 155 *Statistical analysis and sample size*

22 156 The sample size was calculated using GPower software version 3.1 (Franz Faul,  
23  
24 157 University of Kiel, Kiel, Germany). The effect size was set to 0.3,  $\alpha$  level to 0.05, and  
25  
26  
27 158 1- $\beta$  to 0.85. A sample size of 100 patients was the optimal sample size needed to  
28  
29  
30 159 prove the difference between the two groups. Considering the easy acquisition of  
31  
32  
33 160 electronic medical records, we included patients who met the inclusion and exclusion  
34  
35 161 criteria between December 2019 and June 2020.  
36

37 162 Statistical analysis was performed using SPSS version 26.0 (SPSS Inc.,  
38  
39  
40 163 Chicago, IL, USA). Continuous data are presented as the means  $\pm$  standard deviations,  
41  
42  
43 164 and categorical data are presented as numbers and percentages. Independent risk  
44  
45 165 factors were identified using univariate and multivariable logistic regression analyses.  
46  
47  
48 166 The measurement data were assessed for normal and nonnormal distributions. Two  
49  
50  
51 167 independent sample t tests were used to determine the differences between groups for  
52  
53  
54 168 continuous variables with a normal distribution. The nonparametric Mann–Whitney U  
55  
56 169 test was used to compare differences between groups for continuous variables with  
57  
58  
59 170 nonnormal distributions. Chi-square tests were used to determine differences between  
60

1  
2  
3  
4 171 groups for categorical data. Variables with  $P < 0.2$  were entered in multivariable  
5  
6 172 logistic regression analysis. A positive stepwise method was used to adjust for  
7  
8  
9 173 multiple risk factors. Each variable was expressed as an odds ratio (OR) with a 95%  
10  
11 174 confidence interval (CI). The predictive value of the risk factors for EA was assessed  
12  
13  
14 175 using the receiver operating characteristic (ROC) curve. The cut-off point was  
15  
16  
17 176 calculated based on the maximum Youden index value. Statistical significance was set  
18  
19 177 at a  $P$  value  $< 0.05$ .

20  
21  
22 178

### 23 24 179 ***Patient and public involvement***

25  
26  
27 180 None of the patients were involved in the design, data provision, analysis, or  
28  
29  
30 181 publication of the study.  
31  
32  
33  
34  
35  
36  
37  
38  
39  
40  
41  
42  
43  
44  
45  
46  
47  
48  
49  
50  
51  
52  
53  
54  
55  
56  
57  
58  
59  
60

## 182 **Results**

### 183 *General information on the study population*

184 In total, 421 patients met the inclusion and exclusion criteria. However, 11  
185 patients were excluded from the study; six were transferred to the intensive care unit  
186 (ICU) postoperatively, and the surgical protocols of five patients were changed during  
187 the operation. Finally, the statistical analysis included 410 patients (Fig. 1). The  
188 incidence of EA was 37.6% (n = 154) in 410 patients. All patients (n = 410) were  
189 divided into two groups: EA and non-EA. Age, BMI, ASA classification, education  
190 level, and medical history did not significantly differ between the two groups (Table  
191 2). The EA group had a significantly higher proportion of male patients than the  
192 non-EA group (P < 0.05).

### 194 *Perioperative clinical information and laboratory tests*

195 Univariate analysis demonstrated significant differences between the EA and  
196 non-EA groups in the VAS score for postoperative pain, body temperature after the  
197 surgery, CRBD, preoperative fasting times, and length of stay in the PACU.

198 Compared with the non-EA group, the VAS score was higher (P < 0.05), body  
199 temperature after the surgery was lower (P < 0.05), and the patient's length of stay in  
200 the PACU and preoperative fasting times were longer in the EA group (P < 0.05).  
201 Moreover, 77.3% (119/154) of patients in the EA group had CRBD, while 83 of 256  
202 patients in the non-EA group experienced CRBD. This variable differed significantly

1  
2  
3  
4 203 between the two groups ( $P < 0.05$ ). Additionally, no significant differences were  
5  
6 204 observed between the two groups regarding surgery type and times, intraoperative  
7  
8  
9 205 blood loss, intraoperative hypotension, warm treatment, and laboratory tests (Table 3).  
10

11 206

### 12 13 14 207 ***Multivariable logistic regression analysis***

15  
16  
17 208 Based on the univariate analysis, variables included in the multivariable logistic  
18  
19 209 regression analysis included the VAS score for postoperative pain, male sex, body  
20  
21 210 temperature after the surgery, length of stay in the PACU, preoperative fasting times,  
22  
23  
24  
25 211 and CRBD.

26  
27 212 The correlation between the VAS score for postoperative pain, male sex,  
28  
29  
30 213 preoperative fasting times, CRBD, and EA after TJA could be determined based on  
31  
32 214 multivariable logistic analysis (Fig. 2). The VAS score for postoperative pain (OR =  
33  
34 215 2.497; 95% CI: 1.951–3.196), male sex (OR = 3.391; 95% CI: 1.781–6.435), CRBD  
35  
36 216 (OR = 7.847; 95% CI: 4.001–15.392), fasting times for solids (OR = 1.703; 95% CI:  
37  
38 217 1.260–2.301), and fasting times for fluids (OR = 1.728; 95% CI: 1.263–2.365) were  
39  
40  
41 218 independent risk factors. However, we could not confirm the independence of  
42  
43  
44 219 variables, such as body temperature after the surgery and length of stay in the PACU,  
45  
46 220 in the multivariable logistic analysis.  
47

48 221

### 49 50 51 222 ***Results of ROC curves for risk factors***

52  
53  
54 223 The predictive value analysed using the ROC curve is demonstrated in Fig. 3.

55  
56  
57 224 The area under the ROC curve (AUC) for the VAS score was 0.769, with a cut-off  
58  
59  
60

1  
2  
3  
4 225 value of 4.0, sensitivity of 60%, and specificity of 87% (95% CI: 0.718–0.819, P <  
5  
6 226 0.001). The AUC of fasting times for solids was 0.753, with a cut-off value of 10.5,  
7  
8  
9 227 sensitivity of 62%, and specificity of 86% (95% CI: 0.699–0.807, P < 0.001). The  
10  
11 228 AUC of fasting times for fluids was 0.768, with a cut-off value of 8.5, sensitivity of  
12  
13  
14 229 64%, and specificity of 74% (95% CI: 0.719–0.816, P < 0.001).  
15  
16  
17 230

## 20 231 **Discussion**

22 232 The results of this study indicated that EA was a common postoperative  
23  
24 233 complication in patients who underwent general anaesthesia for TJA. Furthermore,  
25  
26 234 this study identified four risk factors associated with with EA in elderly patients who  
27  
28 235 underwent TJA, including postoperative pain, CRBD, male sex, and preoperative  
29  
30  
31 236 fasting times.  
32  
33

34  
35  
36 237 The incidence of EA was 37.6% in elderly patients who underwent TJA. To our  
37  
38 238 knowledge, this report is the first on the incidence of EA in elderly patients who have  
39  
40 239 undergone TJA. Previous research has shown that the incidence of EA varies widely.  
41  
42  
43 240 A prospective study demonstrated that 13.9% (158/1136) of adult patients had EA in  
44  
45 241 the PACU [19]. Xi et al. [7] reported that the incidence of EA in elderly patients who  
46  
47 242 underwent gastrointestinal surgery was 40%. Moreover, an extremely high proportion  
48  
49 243 of patients, 90.5% (19/21), experienced EA because of the effects of succinylcholine  
50  
51 244 [20]. These large differences may be attributed to the types of surgery, anaesthetic  
52  
53  
54 245 management, patient characteristics, and assessment methods.  
55  
56  
57  
58  
59  
60

1  
2  
3  
4 246 Many scales are available to assess EA in adults, including the RASS, Ricker  
5  
6 247 Sedation-Agitation Scale (RSAS), Aono's 4-point scale and so on. Unlike the  
7  
8  
9 248 excellent reliability and validity in assessing sedation and agitation in the ICU [18],  
10  
11 249 the reliability and validity of the RASS in the PACU have not been validated;  
12  
13  
14 250 Nevertheless, the RASS is easy to use and administer and has discrete criteria [18].  
15  
16  
17 251 Thus, we believe that RASS is a effective and efficient method of assessing EA in the  
18  
19 252 PACU. Similarly, Makarem et al. [19] and Xi et al. [7] also chose the RASS to assess  
20  
21  
22 253 EA in the PACU.

23  
24  
25 254 Almost all researchers agree that postoperative pain is an independent risk factor  
26  
27 255 for EA. Pain, an uncomfortable emotional experiences, can lead to some complex  
28  
29  
30 256 neurobehavioural behaviours, such as agitation [21]. Our study demonstrated that the  
31  
32  
33 257 VAS scores of patients in the EA group were higher than those in the non-EA group,  
34  
35 258 and a postoperative pain VAS score  $\geq 4$  was the cut-off point for EA. Pain after TJA  
36  
37  
38 259 is common, and several studies have discovered that more than 50% of patients have  
39  
40  
41 260 suboptimal pain management afterTHA, and 75% of patients undergoing TKA  
42  
43 261 complain of moderate-to-severe pain [12,22]. In this study, 72% (295/410) of patients  
44  
45  
46 262 complained of pain, and 5% (21/410) of patients experienced severe pain, comparable  
47  
48  
49 263 to the results of previous reports. Yu et al. [23] found that nearly half of patients had  
50  
51 264 EA because of insufficient postoperative analgesia. Peripheral nerve blocks (PNBs)  
52  
53  
54 265 can provide excellent analgesia [24]. In our study, FNB was routinely used in patients  
55  
56  
57 266 undergoing TKA, and FICB was used for THA to improve postoperative analgesia.  
58  
59 267 However, due to anatomic variations and individual characteristics, PNBs may not  
60

1  
2  
3  
4 268 absolutely eliminate pain in patients undergoing TJA, leading to some patients  
5  
6  
7 269 experiencing EA due to postoperative pain in the study. Moreover, sore throat and  
8  
9  
10 270 catheter-related pain should not be ignored because postoperative pain is not limited  
11  
12 271 to wound pain. Based on these findings, we strongly suggest that multimodal  
13  
14 272 analgesia should be performed to benefit patients, especially with preventive  
15  
16  
17 273 analgesia.

18  
19  
20 274 The placement of an indwelling catheter is a common clinical procedure in the  
21  
22 275 perioperative period. The collected urine is used for urine measurements and blood  
23  
24  
25 276 volume evaluation. However, patients with indwelling catheters are prone to CRBD  
26  
27 277 [25]. CRBD is characterised by discomfort confined to the suprapubic region, burning  
28  
29  
30 278 sensation, pain, and urinary urgency and frequency [26,27]. CRBD can occur in 47–  
31  
32  
33 279 90% of patients with a indwelling catheter [5] and CRBD can increase the incidence  
34  
35 280 of EA and pain sensation after surgery [28]. A retrospective study reported that  
36  
37  
38 281 approximately 10% of patients experienced EA during urological surgery, possibly  
39  
40  
41 282 related to CRBD [16]. In our study, 28.0% (119 of 410) of patients experienced EA  
42  
43  
44 283 due to CRBD, and the higher incidence of EA may be due to the age of the recruited  
45  
46  
47 284 patients. This is because age  $\geq 50$  years was an independent predictor of CRBD [29].  
48  
49  
50 285 Indwelling catheters as a risk factor for EA have been reported previously in the  
51  
52  
53 286 literature [30]. Early removal of indwelling catheters is helpful in decreasing EA  
54  
55  
56 287 associated with CRBD.

57  
58  
59 288 Regarding the effect of sex on EA, the results of the study are similar to those of  
60  
289 reported in other literatures in which male sex was identified as an independent risk

1  
2  
3  
4 290 factor for EA [29]. This observation could be explained by several factors. First, male  
5  
6 291 patients were high-risk patients with CRBD [29]. Half of all men aged  $\geq 50$  years and  
7  
8  
9 292 over 80% of men aged  $\geq 80$  years have prostatic hyperplasia, which can easily cause  
10  
11 293 discomfort and pain when the catheter tip contacts the bladder triangle on the pubis  
12  
13  
14 294 [31]. Thus, male patients especially have difficulty tolerating the discomfort associated  
15  
16  
17 295 with catheters during the awakening period of anaesthesia. Furthermore, male patients  
18  
19 296 have low postoperative pain tolerance, requiring more analgesics than female patients  
20  
21  
22 297 [32].

23  
24  
25 298 Preoperative fasting is one of the preoperative instructions for patients. whether  
26  
27 299 preoperative fasting is a risk factor for EA has not been reported in previous studies..  
28  
29  
30 300 Prolonged preoperative fasting can cause metabolic, physical, and psychological  
31  
32 301 discomfort in patients, eventually leading to abnormal neurobehavioural changes,  
33  
34  
35 302 such as postoperative delirium (PD) [33]. However, EA was not analysed. In this  
36  
37  
38 303 study, the fasting times of the EA group were significantly longer than those of the  
39  
40  
41 304 non-EA group and exceeded conventional fasting times (no more than 8 hours for  
42  
43 305 solids and no more than 6 hours for liquids before surgery)[34], furthermore, 10.5 h  
44  
45 306 (fasting times for solids) and 8.6 h (fasting times for fluids) are cut-off points for EA.  
46  
47  
48 307 Prolonged preoperative fasting times led to patient anxiety, and the degree of anxiety  
49  
50  
51 308 was related to the length of fasting time [34], While preoperative anxiety has been  
52  
53  
54 309 reported as a risk factor for EA [16]. Due to the numerous patients and the lack of  
55  
56 310 medical resources, patients may often experienced longer fasting times than they were  
57  
58  
59  
60



1  
2  
3  
4 311 advised .To reduce the incidence of EA, effective preoperative education and  
5  
6 312 scientific operation schedule lists should be developed.  
7  
8

9 313• This study had some limitations. Firstly, we only included elderly patients  
10  
11 314 who had undergone intravenous anaesthesia. Future studies may utilize other methods  
12  
13 315 and anaesthetics. Secondly, this was a single-centre study; therefore, the  
14  
15 316 generalisability of the results was not fully verified. Future multi-centre studies must  
16  
17 317 assess external validity. Lastly, this is a retrospective cohort study; some bias is  
18  
19 318 unavoidable. Future prospective studies must be conducted for further research.  
20  
21  
22  
23  
24  
25  
26

27 319

## 320 **Conclusions**

321 In short, this retrospective study showed that EA is a common complication in  
322 elderly patients after TJA .EA occurred in 37.6% of the elderly patients who  
33  
34 323 underwent TJA. Postoperative pain, CRBD, male sex, and preoperative fasting times  
35  
36 324 were independent predictors of EA.These risk factors can contribute to identifying  
37  
38 325 high-risk patients to develop effective strategies to prevent and treat EA. Agitation  
39  
40 326 has many causes [35]; therefore, the best clinical strategies should be multimodal.  
41  
42  
43  
44  
45  
46  
47

48 327

49 328 **Contributorship statements:** Zhenguo Luo and Jianhong Hao have made substantial  
50  
51 329 contributions to the conception or design of the manuscript. Naigeng Wang wrote this  
52  
53 330 manuscript and made some changes after review. Furthermore, he worked with Jing  
54  
55 331 Du and Jie Zhang to acquire, analyse, and interpret the data. All authors have  
56  
57 332 participated in drafting the manuscript, and Zhenguo Luo revised it critically. All  
58  
59  
60

1  
2  
3  
4  
5  
6  
7  
8  
9  
10  
11  
12  
13  
14  
15  
16  
17  
18  
19  
20  
21  
22  
23  
24  
25  
26  
27  
28  
29  
30  
31  
32  
33  
34  
35  
36  
37  
38  
39  
40  
41  
42  
43  
44  
45  
46  
47  
48  
49  
50  
51  
52  
53  
54  
55  
56  
57  
58  
59  
60

333 authors contributed equally to the manuscript and read and approved the final version  
334 of the manuscript.

335

336 **Competing interest:** No potential conflict of interest relevant to this article was  
337 reported.

338

339 **Funding:** This work was supported by the Key Research and Development Program  
340 of Shaanxi, China (2019SF-205, 2022SF-149).

341

342 **Data sharing statement :** No additional data are available.

343

344 **Ethics statements :** This study was approved by the Biomedical Research Ethics  
345 Committee of our hospital (approval no. 201812001). The study obtained consent to  
346 gather patients' medical record information through telephone follow-up.

347

348 **Acknowledgement:** We would like to thank Editage ([www.editage.cn](http://www.editage.cn)) for English  
349 language editing.

## References

1. Yang X, Hu Z, Peng F, et al. Effects of dexmedetomidine on emergence agitation and recovery quality among children undergoing surgery under general anesthesia: a meta-analysis of randomized controlled trials. *Front Pediatr.* 2020;8: 580226.
2. Shi Y, Zhang X, Sun Y, et al. Emergence agitation after the cleft lip or palate surgery in pediatric patients: a prospective study. *J Stomatol Oral Maxillofac Surg.* 2021;122(6): 539-543.
3. Kim H-J, Kim D-K, Kim H-Y, et al. Risk factors of emergence agitation in adults undergoing general anesthesia for nasal surgery. *Clin Exp Otorhinolaryngol.* 2015;8(1): 46-51.
4. Feng Z, Shi X, Yan X, et al. Comparing the effects of dexmedetomidine versus propofol on the treatment of emergence agitation in adult patients after general anesthesia: study protocol for a randomized, superiority, controlled trial (DP-TEA Trial). *Trials.* 2021;16;22(1):811
5. Zhou H, Pan Y, Liu C, et al. Emergence agitation after intraoperative neurolytic celiac plexus block with alcohol: a case report. *BMC Anesthesiol.* 2021;21(1): 204.
6. Lee SJ, Sung TY. Emergence agitation: current knowledge and unresolved questions. *Korean J Anesthesiol.* 2020;73(6):471-485.

1  
2  
3  
4  
5  
6  
7  
8  
9  
10  
11  
12  
13  
14  
15  
16  
17  
18  
19  
20  
21  
22  
23  
24  
25  
26  
27  
28  
29  
30  
31  
32  
33  
34  
35  
36  
37  
38  
39  
40  
41  
42  
43  
44  
45  
46  
47  
48  
49  
50  
51  
52  
53  
54  
55  
56  
57  
58  
59  
60

- 370 7 Mei X, Tong J. The plasma levels of brain-derived neurotrophic factor  
371 are positively associated with emergence agitation in the elderly after  
372 gastrointestinal surgery. *J Anesth.* 2016;30(5): 811-816.
- 373 8 Sun M, Peng T, Sun Y, et al. Intraoperative use of low-dose  
374 dexmedetomidine for the prevention of emergence agitation following  
375 general anaesthesia in elderly patients: a randomized controlled trial.  
376 *Aging Clin Exp Res.* 2022;34(3):611-618.
- 377 9. Niu R, Egan C, Fang C, et al. Total joint arthroplasty in homeless patients at  
378 an urban safety net hospital. *J Am Acad Orthop Surg.* 2022;30(11):523-527.
- 379 10. Katz JN, Arant KR, Loeser RF. Diagnosis and treatment of hip and knee  
380 osteoarthritis: a review. *JAMA.* 2021;325(6): 568-578.
- 381 11. Zhou Q, Zhou X, Zhang Y, et al. Predictors of postoperative delirium in  
382 elderly patients following total hip and knee arthroplasty: a systematic review  
383 and meta-analysis. *BMC Musculoskelet Disord.* 2021;22(1): 945
- 384 12. De Luca ML, Ciccarello M, Martorana M, et al. Pain monitoring and  
385 management in a rehabilitation setting after total joint replacement.  
386 *Medicine (Baltimore).* 2018;97(40): e12484.
- 387 13. Wei B, Feng Y, Chen W, et al. Risk factors for emergence agitation in adults  
388 after general anesthesia: A systematic review and meta-analysis. *Acta*  
389 *Anaesthesiol Scand.* 2021;65(6):719-729.
- 390 14. Demir CY, Yuzkat N. Prevention of Emergence Agitation with  
391 Ketamine in Rhinoplasty. *Aesthetic Plast Surg.* 2018;42(3):847-853.

- 1  
2  
3  
4 392 15. Tolly B, Waly A, Peterson G, et al. Adult Emergence Agitation: A  
5  
6 393 Veteran-Focused Narrative Review. *Anesth Analg*.  
7  
8  
9 394 2021;1;132(2):353-364  
10  
11 395 16. Kim HC, Kim E, Jeon YT, et al. Postanaesthetic emergence agitation in  
12  
13  
14 396 adult patients after general anaesthesia for urological surgery. *J Int*  
15  
16  
17 397 *Med Res*. 2015;43(2):226-35.  
18  
19 398 17. Kang X, Lin K, Tang H, et al. Risk Factors for Emergence Agitation in Adults  
20  
21  
22 399 Undergoing Thoracoscopic Lung Surgery: A Case-Control Study of 1,950  
23  
24  
25 400 Patients. *J Cardiothorac Vasc Anesth*. 2020;34(9):2403-2409.  
26  
27 401 18. Sessler CN, Gosnell MS, Grap MJ, et al. The Richmond Agitation-Sedation  
28  
29  
30 402 Scale: validity and reliability in adult intensive care unit patients. *Am J Respir*  
31  
32  
33 403 *Crit Care Med*. 2002;166(10): 1338-1344.  
34  
35 404 19. Makarem J, Larijani AH, Eslami B, et al. Risk factors of inadequate  
36  
37  
38 405 emergence following general anesthesia with an emphasis on patients with  
39  
40  
41 406 substance dependence history. *Korean J Anesthesiol*. 2020;73(4): 302-310.  
42  
43 407 20. Lee S-J, Sung T-Y, Cho C-K. Comparison of emergence agitation between  
44  
45  
46 408 succinylcholine and rocuronium-sugammadex in adults following closed  
47  
48  
49 409 reduction of a nasal bone fracture: a prospective randomized controlled trial.  
50  
51  
52 410 *BMC Anesthesiol*. 2019;19(1): 228.  
53  
54 411 21. Menser C, Smith H. Emergence Agitation and Delirium: Considerations for  
55  
56  
57 412 Epidemiology and Routine Monitoring in Pediatric Patients. *Local Reg Anesth*.  
58  
59 413 2020;27;13:73-83.  
60

- 1  
2  
3  
4 414 22. Erlenwein J, Müller M, Falla D, et al. Clinical relevance of persistent  
5  
6 415 postoperative pain after total hip replacement - a prospective observational  
7  
8  
9 416 cohort study. *J Pain Res.* 2017;10: 2183-2193.  
10  
11  
12 417 23. Yu D, Chai W, Sun X, et al. Emergence agitation in adults: risk factors in  
13  
14 418 2,000 patients. *Can J Anaesth.* 2010;57(9):843-8.  
15  
16  
17 419 24. Dotto A, Dunsmuir D, Sun T, et al. The use of the Panda-Nerve Block pain app  
18  
19 420 in single-shot peripheral nerve block patients: a feasibility study. *Can J*  
20  
21  
22 421 *Anaesth.* 2020;67(9):1140-1151.  
23  
24  
25 422 25. Jang EB, Hong SH, Kim KS, et al. Catheter-related bladder discomfort: how  
26  
27 423 can we manage it? *Int Neurourol J.* 2020;24(4): 324-331.  
28  
29  
30 424 26. Bach H, Kaasby K, Sørensen A, et al. Incidence and severity of  
31  
32 425 catheter-related bladder discomfort among nonurological adult patients in a  
33  
34 426 postanesthesia care unit. *J Perianesth Nurs.* 2020;35(1): 29-33.  
35  
36  
37 427 27. Kim D-H, Park J-Y, Yu J, et al. Intravenous lidocaine for the prevention of  
38  
39 428 postoperative catheter-related bladder discomfort in male patients undergoing  
40  
41 429 transurethral resection of bladder tumors: a randomized, double-blind,  
42  
43 430 controlled trial. *Anesth Analg.* 2020;131(1): 220-227.  
44  
45  
46  
47 431 28. Binhas M, Motamed C, Hawajri N, et al. Predictors of catheter-related bladder  
48  
49 432 discomfort in the post-anaesthesia care unit. *Ann Fr Anesth Reanim.*  
50  
51 433 2011;30(2): 122-125.  
52  
53  
54  
55 434 29. Li SY, Song LP, Ma YS, et al. Predictors of catheter-related bladder  
56  
57 435 discomfort after gynaecological surgery. *BMC Anesthesiol.* 2020;20(1): 97.  
58  
59  
60

- 1  
2  
3  
4 436 30. Fields A, Huang J, Schroeder D, et al. Agitation in adults in the  
5  
6 437 post-anaesthesia care unit after general anaesthesia. *Br J*  
7  
8  
9 438 *Anaesth.* 2018;121:1052–8.
- 10  
11 439 31. Chughtai B, Forde JC, Thomas DDM, et al. Benign prostatic hyperplasia. *Nat*  
12  
13  
14 440 *Rev Dis Primers.* 2016;2: 16031.
- 15  
16  
17 441 32. Tsui SL, Tong WN, Irwin M, et al. The efficacy, applicability and side-effects  
18  
19 442 of postoperative intravenous patient-controlled morphine analgesia: an audit of  
20  
21  
22 443 1233 Chinese patients. *Anaesth Intensive Care.* 1996;24(6): 658-664.
- 23  
24  
25 444 33. Jin Z, Hu J, Ma D. Postoperative delirium: perioperative assessment, risk  
26  
27 445 reduction, and management. *Br J Anaesth.* 2020;125(4): 492-504.
- 28  
29  
30 446 34. Li Y, Lu Q, Wang B, et al. Preoperative Fasting Times for Patients Undergoing  
31  
32 447 Elective Surgery at a Pediatric Hospital in Shanghai: The Big  
33  
34  
35 448 Evidence-Practice Gap. *J Perianesth Nurs.* 2021;36(5):559-563
- 36  
37  
38 449 35. Yan LM, Chen H, Yu RG, et al. Emergence agitation during recovery from  
39  
40 450 intracranial surgery under general anaesthesia: a protocol and statistical  
41  
42  
43 451 analysis plan for a prospective multicentre cohort study. *BMJ Open.*  
44  
45 452 2015;21;5(4):e007542

458 **Tables**459 **Table 1 Richmond agitation sedation scale**

| Score | Term              | Description                                                                                  |
|-------|-------------------|----------------------------------------------------------------------------------------------|
| +4    | Combative         | Overtly combative, violent, immediate danger to staff                                        |
| +3    | Very agitated     | Pulls or removes tube(s) or catheter(s); aggressive                                          |
| +2    | Agitated          | Frequent non-purposeful movement; fights ventilator                                          |
| +1    | Restless          | Anxious but movements not aggressive or vigorous                                             |
| 0     | Alert and calm    |                                                                                              |
| -1    | Drowsy            | Not fully alert but has sustained awakening (eye-opening/eye contact) to voice (>10 seconds) |
| -2    | Light sedation    | Briefly awake with eye contact to voice (<10 seconds)                                        |
| -3    | Moderate sedation | Movement or eye opening to voice (but no eye contact)                                        |
| -4    | Deep sedation     | No response to voice, but movement or eye opening to physical stimulation                    |
| -5    | Unarousable       | No response to voice or physical stimulation                                                 |

460

461 **Notes:** Scores of 1 to 4 indicated different levels of agitation, 0 indicated calmness  
 462 and alertness, and -1 to -5 indicated different levels of sedation.

463

464

465



466 **Table 2 Population data and medical history**

| <b>Variables</b>                     | <b>Agitation Groups<br/>(n=154)</b> | <b>Non-agitation Groups<br/>(n=256)</b> | <b>P-value</b> |
|--------------------------------------|-------------------------------------|-----------------------------------------|----------------|
| <b>Age</b>                           | 69. 84±6. 53                        | 69. 39±6. 82                            | 0. 238         |
| <b>Male (n, %)</b>                   | 91 (59. 1%)                         | 71 (27. 7%)                             | <0. 001***     |
| <b>BMI (Kg. m<sup>-2</sup>)</b>      | 22. 75±4. 31                        | 23. 17±2. 56                            | 0. 253         |
| <b>ASA classification<br/>(n, %)</b> |                                     |                                         | 0. 221         |
| <b>I</b>                             | 0                                   | 0                                       |                |
| <b>II</b>                            | 118 (76. 6%)                        | 182 (71. 1%)                            |                |
| <b>III</b>                           | 36 (23. 4%)                         | 74 (28. 9%)                             |                |
| <b>Education (n, %)</b>              |                                     |                                         | 0. 412         |
| Illiteracy                           | 42 (27. 3%)                         | 55 (21. 5%)                             |                |
| Primary school                       | 45 (29. 2%)                         | 93 (36. 3%)                             |                |
| Secondary school                     | 59 (38. 3%)                         | 96 (37. 5%)                             |                |
| University and above                 | 8 (5. 2%)                           | 12 (4. 7%)                              |                |
| <b>Medical history<br/>(n, %)</b>    |                                     |                                         |                |
| <b>Heart disease</b>                 |                                     |                                         | 0. 816         |
| <b>Yes</b>                           | 72 (46. 8%)                         | 113 (44. 1%)                            |                |
| <b>No</b>                            | 82 (53. 2%)                         | 143 (55. 9%)                            |                |

| Variables            | Agitation Groups<br>(n=154) | Non-agitation Groups<br>(n=256) | P-value |
|----------------------|-----------------------------|---------------------------------|---------|
| Respiratory diseases |                             |                                 | 0.760   |
| Yes                  | 80 (51.9%)                  | 129 (50.4%)                     |         |
| No                   | 74 (48.1%)                  | 127 (49.6%)                     |         |
| Hypertension         |                             |                                 | 0.981   |
| Yes                  | 78 (50.6%)                  | 131 (51.2%)                     |         |
| No                   | 76 (49.4%)                  | 125 (48.8%)                     |         |
| Diabetes             |                             |                                 |         |
| Yes                  | 71 (46.1%)                  | 119 (46.5%)                     | 0.940   |
| No                   | 83 (53.9%)                  | 137 (53.5%)                     |         |

467 **Notes:** Clinical information of patients were analysed using univariate analysis.

468 Continuous data are presented as the means  $\pm$  standard deviations, while categorical

469 data are presented as numbers and percentages. \*P-value, differences between

470 patients in the two groups. \*P<0.05, \*\*\*P<0.001. ASA: American Society of

471 Anesthesiologists; BMI: body mass index.

472

473

474

475

476

477

478 **Table 3 Patients' perioperative clinical information and agitation-related**  
 479 **laboratory test indicators**

| <b>Variables</b>                                       | <b>Agitation<br/>Groups<br/>(n=154)</b> | <b>Non-agitation<br/>Groups<br/>(n=256)</b> | <b>P-value</b> |
|--------------------------------------------------------|-----------------------------------------|---------------------------------------------|----------------|
| <b>Operation type (n, %)</b>                           |                                         |                                             | 0.524          |
| TKA                                                    | 85 (55.2%)                              | 133 (52.0%)                                 |                |
| THA                                                    | 69 (44.8%)                              | 123 (48.0%)                                 |                |
| <b>Operation times in TKA (min)</b>                    | 144.42±59.96                            | 143.91±46.19                                | 0.236          |
| <b>Operation times in THA (min)</b>                    | 139.96±64.60                            | 128.48±58.98                                | 0.213          |
| <b>VAS score for postoperative pain</b>                | 3.50±2.13                               | 1.67±1.02                                   | <0.001***      |
| <b>Body temperature at the end of the surgery (°C)</b> | 35.87±0.73                              | 36.03±0.94                                  | 0.037*         |
| <b>CRBD (n, %)</b>                                     |                                         |                                             | <0.001***      |
| Yes                                                    | 119(77.3%)                              | 83 (32.4%)                                  |                |
| No                                                     | 35(22.7%)                               | 173(67.6%)                                  |                |
| <b>Preoperative fasting times (h)</b>                  |                                         |                                             |                |
| fasting times for solids                               | 10.19±1.05                              | 8.76±0.88                                   | <0.001***      |
| fasting times for fluids                               | 4.81±1.14                               | 2.99±0.92                                   | <0.001***      |
| <b>Intraoperative blood loss (ml)</b>                  | 217.26±30.18                            | 200.32±27.48                                | 0.224          |

1  
2  
3  
4  
5  
6  
7  
8  
9  
10  
11  
12  
13  
14  
15  
16  
17  
18  
19  
20  
21  
22  
23  
24  
25  
26  
27  
28  
29  
30  
31  
32  
33  
34  
35  
36  
37  
38  
39  
40  
41  
42  
43  
44  
45  
46  
47  
48  
49  
50  
51  
52  
53  
54  
55  
56  
57  
58  
59  
60

480

| <b>Variables</b>                                    | <b>Agitation Groups<br/>(n=154)</b> | <b>Non-agitation Groups<br/>(n=256)</b> | <b>P-value</b> |
|-----------------------------------------------------|-------------------------------------|-----------------------------------------|----------------|
| <b>Severe Intraoperative hypotension<br/>(n, %)</b> |                                     |                                         | 0.261          |
| Yes                                                 | 14 (9.1%)                           | 15 (5.9%)                               |                |
| No                                                  | 140 (90.9%)                         | 241 (94.1%)                             |                |
| <b>Postoperative nausea and vomiting<br/>(n, %)</b> |                                     |                                         | 0.332          |
| Yes                                                 | 67 (43.5%)                          | 124 (48.4%)                             |                |
| No                                                  | 87 (56.5%)                          | 132 (51.6%)                             |                |
| <b>The duration in PACU (min)</b>                   | 32.83±14.07                         | 31.00±8.57                              | 0.025*         |
| <b>Warm treatment (n, %)</b>                        |                                     |                                         | 0.880          |
| Yes                                                 | 68 (44.2%)                          | 115 (44.9%)                             |                |
| No                                                  | 86 (55.8%)                          | 141 (55.1%)                             |                |
| <b>Laboratory testing</b>                           |                                     |                                         |                |
| HCO <sub>3</sub> <sup>-</sup> (mmol/L)              | 22.3±1.86                           | 24.7±1.33                               | 0.291          |
| PaCO <sub>2</sub> (mmHg)                            | 38.61±1.42                          | 39.44±1.58                              | 0.318          |
| PaO <sub>2</sub> (mmHg)                             | 89.52±1.74                          | 90.17±1.55                              | 0.282          |
| pH                                                  | 7.447±0.32                          | 7.426±0.41                              | 0.263          |
| Hb levels (g/L)                                     | 16.6±1.93                           | 17.1±1.85                               | 0.274          |

1  
2  
3  
4 481 **Notes:** Patients' perioperative clinical information and agitation-related laboratory  
5  
6 482 test indicators were analysed using univariate analysis. Continuous data are presented  
7  
8  
9 483 as means  $\pm$  standard deviations, while categorical data are presented as numbers and  
10  
11 484 percentages. \*P-value, differences between patients in the two groups. \*P<0. 05,  
12  
13  
14 485 \*\*\*P<0. 001.  
15  
16  
17 486  
18  
19 487  
20  
21 488  
22  
23 489  
24  
25 490  
26  
27 491  
28  
29 492  
30  
31 493  
32  
33 494  
34  
35 495  
36  
37 496  
38  
39 497  
40  
41 498  
42  
43 499  
44  
45 500  
46  
47 501  
48  
49 502  
50  
51  
52  
53  
54  
55  
56  
57  
58  
59  
60

1  
2  
3  
4 5035  
6  
7 504 **Figure legends**8  
9 505 **Figure 1 Flow chart of study participants.** In total, 421 patients met the inclusion  
10  
11 506 and exclusion criteria. However, 11 patients were excluded from the study; six were  
12  
13 507 transferred to the ICU postoperatively, and the surgical protocols of five were  
14  
15 508 changed during the operation. Finally, the statistical analysis included 410 patients.  
16  
17  
18

19 509

20  
21  
22 510 **Figure 2 Risk factors for EA using metanalysis plot.** The VAS score for  
23  
24 511 postoperative pain (OR = 2.497; 95% CI: 1.951–3.196), male sex (OR = 3.391; 95%  
25  
26 512 CI: 1.781–6.435), urinary catheter irritation (OR = 7.847; 95% CI: 4.001–15.392),  
27  
28 513 fasting times for solids (OR = 1.703; 95% CI: 1.260–2.301), and fasting times for  
29  
30 514 fluids (OR = 1.728; 95% CI: 1.263–2.365) were the independent risk factors.  
31  
32  
33

34 515

35  
36  
37 516 **Figure 3 Risk factors for EA using the ROC curve.** Predictive values of risk factors  
38  
39 517 were assessed using the ROC curve. The VAS score for postoperative pain (AUC =  
40  
41 518 0.769, 95% CI: 0.718–0.819,  $P < 0.001$ ), fasting times for solids (AUC = 0.753, 95%  
42  
43 519 CI: 0.699–0.807,  $P < 0.001$ ) and fasting times for fluids (AUC = 0.768, 95% CI:  
44  
45 520 0.719–0.816,  $P < 0.001$ ) demonstrated good predictive effects.  
46  
47  
48  
49

50 521

51 522

52 523

53 524

1  
2  
3  
4 5255 6  
7  
8 526 **Reporting checklist for cross sectional study.**9  
10 527 Based on the STROBE cross sectional guidelines.11  
12  
13  
14 528 **Instructions to authors**15  
16  
17 529 Complete this checklist by entering the page numbers from your manuscript  
18 530 where readers will find each of the items listed below.19  
20  
21 531 Your article may not currently address all the items on the checklist. Please  
22 532 modify your text to include the missing information. If you are certain that an  
23 533 item does not apply, please write "n/a" and provide a short explanation.24  
25  
26 534 Upload your completed checklist as an extra file when you submit to a journal.27  
28  
29 535 In your methods section, say that you used the STROBE cross  
30 536 sectionalreporting guidelines, and cite them as:31  
32  
33 537 von Elm E, Altman DG, Egger M, Pocock SJ, Gotsche PC, Vandembroucke  
34 538 JP. The Strengthening the Reporting of Observational Studies in Epidemiology  
35 539 (STROBE) Statement: guidelines for reporting observational studies.

|  |          |                                                                                        | Page   |
|--|----------|----------------------------------------------------------------------------------------|--------|
|  |          | Reporting Item                                                                         | Number |
|  |          | Title and abstract                                                                     |        |
|  | Title    | #1a Indicate the study's design with a commonly used term in the title or the abstract | 1      |
|  | Abstract | #1b Provide in the abstract an informative and balanced summary of what was done and   | 3      |

what was found

**Introduction**

|    |                      |     |                                                |    |
|----|----------------------|-----|------------------------------------------------|----|
| 8  | Background /         | #2  | Explain the scientific background and          | 5  |
| 9  | rationale            |     | rationale for the investigation being          |    |
| 10 |                      |     | reported                                       |    |
| 11 |                      |     |                                                |    |
| 12 |                      |     |                                                |    |
| 13 |                      |     |                                                |    |
| 14 | Objectives           | #3  | State specific objectives, including any       | 6  |
| 15 |                      |     | prespecified hypotheses                        |    |
| 16 |                      |     |                                                |    |
| 17 |                      |     |                                                |    |
| 18 | Methods              |     |                                                |    |
| 19 |                      |     |                                                |    |
| 20 |                      |     |                                                |    |
| 21 | Study design         | #4  | Present key elements of study design           | NA |
| 22 |                      |     | early in the paper                             |    |
| 23 |                      |     |                                                |    |
| 24 |                      |     |                                                |    |
| 25 | Setting              | #5  | Describe the setting, locations, and           | 7  |
| 26 |                      |     | relevant dates, including periods of           |    |
| 27 |                      |     | recruitment, exposure, follow-up, and          |    |
| 28 |                      |     | data collection                                |    |
| 29 |                      |     |                                                |    |
| 30 |                      |     |                                                |    |
| 31 |                      |     |                                                |    |
| 32 |                      |     |                                                |    |
| 33 | Eligibility criteria | #6a | Give the eligibility criteria, and the         | 7  |
| 34 |                      |     | sources and methods of selection of            |    |
| 35 |                      |     | participants.                                  |    |
| 36 |                      |     |                                                |    |
| 37 |                      |     |                                                |    |
| 38 |                      |     |                                                |    |
| 39 |                      | #7  | Clearly define all outcomes, exposures,        | 8  |
| 40 |                      |     | predictors, potential confounders, and         |    |
| 41 |                      |     | effect modifiers. Give diagnostic criteria, if |    |
| 42 |                      |     | applicable                                     |    |
| 43 |                      |     |                                                |    |
| 44 |                      |     |                                                |    |
| 45 |                      |     |                                                |    |
| 46 | Data sources /       | #8  | For each variable of interest give sources     | 8  |
| 47 | measurement          |     | of data and details of methods of              |    |
| 48 |                      |     | assessment (measurement). Describe             |    |
| 49 |                      |     | comparability of assessment methods if         |    |
| 50 |                      |     | there is more than one group. Give             |    |
| 51 |                      |     | information separately for for exposed         |    |
| 52 |                      |     | and unexposed groups if applicable.            |    |
| 53 |                      |     |                                                |    |
| 54 |                      |     |                                                |    |
| 55 |                      |     |                                                |    |
| 56 |                      |     |                                                |    |
| 57 |                      |     |                                                |    |
| 58 |                      |     |                                                |    |
| 59 |                      |     |                                                |    |
| 60 |                      |     |                                                |    |



|    |                        |      |                                                                                                                                                                                                                                                                                |      |
|----|------------------------|------|--------------------------------------------------------------------------------------------------------------------------------------------------------------------------------------------------------------------------------------------------------------------------------|------|
| 1  |                        |      |                                                                                                                                                                                                                                                                                |      |
| 2  |                        |      |                                                                                                                                                                                                                                                                                |      |
| 3  |                        |      |                                                                                                                                                                                                                                                                                |      |
| 4  | Bias                   | #9   | Describe any efforts to address potential sources of bias                                                                                                                                                                                                                      | 8-9  |
| 5  |                        |      |                                                                                                                                                                                                                                                                                |      |
| 6  |                        |      |                                                                                                                                                                                                                                                                                |      |
| 7  |                        |      |                                                                                                                                                                                                                                                                                |      |
| 8  | Study size             | #10  | Explain how the study size was arrived at                                                                                                                                                                                                                                      | 9    |
| 9  |                        |      |                                                                                                                                                                                                                                                                                |      |
| 10 |                        |      |                                                                                                                                                                                                                                                                                |      |
| 11 | Quantitative variables | #11  | Explain how quantitative variables were handled in the analyses. If applicable, describe which groupings were chosen, and why                                                                                                                                                  | 8    |
| 12 |                        |      |                                                                                                                                                                                                                                                                                |      |
| 13 |                        |      |                                                                                                                                                                                                                                                                                |      |
| 14 |                        |      |                                                                                                                                                                                                                                                                                |      |
| 15 |                        |      |                                                                                                                                                                                                                                                                                |      |
| 16 |                        |      |                                                                                                                                                                                                                                                                                |      |
| 17 |                        |      |                                                                                                                                                                                                                                                                                |      |
| 18 | Statistical methods    | #12a | Describe all statistical methods, including those used to control for confounding                                                                                                                                                                                              | 9-10 |
| 19 |                        |      |                                                                                                                                                                                                                                                                                |      |
| 20 |                        |      |                                                                                                                                                                                                                                                                                |      |
| 21 |                        |      |                                                                                                                                                                                                                                                                                |      |
| 22 | Statistical methods    | #12b | Describe any methods used to examine subgroups and interactions                                                                                                                                                                                                                | 9-10 |
| 23 |                        |      |                                                                                                                                                                                                                                                                                |      |
| 24 |                        |      |                                                                                                                                                                                                                                                                                |      |
| 25 |                        |      |                                                                                                                                                                                                                                                                                |      |
| 26 |                        |      |                                                                                                                                                                                                                                                                                |      |
| 27 | Statistical methods    | #12c | Explain how missing data were addressed                                                                                                                                                                                                                                        | NA   |
| 28 |                        |      |                                                                                                                                                                                                                                                                                |      |
| 29 |                        |      |                                                                                                                                                                                                                                                                                |      |
| 30 |                        |      |                                                                                                                                                                                                                                                                                |      |
| 31 | Statistical methods    | #12d | If applicable, describe analytical methods taking account of sampling strategy                                                                                                                                                                                                 | NA   |
| 32 |                        |      |                                                                                                                                                                                                                                                                                |      |
| 33 |                        |      |                                                                                                                                                                                                                                                                                |      |
| 34 |                        |      |                                                                                                                                                                                                                                                                                |      |
| 35 | Statistical methods    | #12e | Describe any sensitivity analyses                                                                                                                                                                                                                                              | 9-10 |
| 36 |                        |      |                                                                                                                                                                                                                                                                                |      |
| 37 |                        |      |                                                                                                                                                                                                                                                                                |      |
| 38 |                        |      |                                                                                                                                                                                                                                                                                |      |
| 39 | Results                |      |                                                                                                                                                                                                                                                                                |      |
| 40 |                        |      |                                                                                                                                                                                                                                                                                |      |
| 41 |                        |      |                                                                                                                                                                                                                                                                                |      |
| 42 | Participants           | #13a | Report numbers of individuals at each stage of study—eg numbers potentially eligible, examined for eligibility, confirmed eligible, included in the study, completing follow-up, and analysed. Give information separately for for exposed and unexposed groups if applicable. | 11   |
| 43 |                        |      |                                                                                                                                                                                                                                                                                |      |
| 44 |                        |      |                                                                                                                                                                                                                                                                                |      |
| 45 |                        |      |                                                                                                                                                                                                                                                                                |      |
| 46 |                        |      |                                                                                                                                                                                                                                                                                |      |
| 47 |                        |      |                                                                                                                                                                                                                                                                                |      |
| 48 |                        |      |                                                                                                                                                                                                                                                                                |      |
| 49 |                        |      |                                                                                                                                                                                                                                                                                |      |
| 50 |                        |      |                                                                                                                                                                                                                                                                                |      |
| 51 |                        |      |                                                                                                                                                                                                                                                                                |      |
| 52 |                        |      |                                                                                                                                                                                                                                                                                |      |
| 53 |                        |      |                                                                                                                                                                                                                                                                                |      |
| 54 | Participants           | #13b | Give reasons for non-participation at each stage                                                                                                                                                                                                                               | 11   |
| 55 |                        |      |                                                                                                                                                                                                                                                                                |      |
| 56 |                        |      |                                                                                                                                                                                                                                                                                |      |
| 57 |                        |      |                                                                                                                                                                                                                                                                                |      |
| 58 |                        |      |                                                                                                                                                                                                                                                                                |      |
| 59 |                        |      |                                                                                                                                                                                                                                                                                |      |
| 60 |                        |      |                                                                                                                                                                                                                                                                                |      |

|    |                  |                                                  |       |
|----|------------------|--------------------------------------------------|-------|
| 1  |                  |                                                  |       |
| 2  |                  |                                                  |       |
| 3  |                  |                                                  |       |
| 4  | Participants     | #13c Consider use of a flow diagram              | 32    |
| 5  |                  |                                                  |       |
| 6  |                  |                                                  |       |
| 7  | Descriptive data | #14a Give characteristics of study participants  | 11    |
| 8  |                  | (eg demographic, clinical, social) and           |       |
| 9  |                  | information on exposures and potential           |       |
| 10 |                  | confounders. Give information separately         |       |
| 11 |                  | for exposed and unexposed groups if              |       |
| 12 |                  | applicable.                                      |       |
| 13 |                  |                                                  |       |
| 14 |                  |                                                  |       |
| 15 |                  |                                                  |       |
| 16 |                  |                                                  |       |
| 17 | Descriptive data | #14b Indicate number of participants with        | 11    |
| 18 |                  | missing data for each variable of interest       |       |
| 19 |                  |                                                  |       |
| 20 |                  |                                                  |       |
| 21 |                  |                                                  |       |
| 22 | Outcome data     | #15 Report numbers of outcome events or          | 11-13 |
| 23 |                  | summary measures. Give information               |       |
| 24 |                  | separately for exposed and unexposed             |       |
| 25 |                  | groups if applicable.                            |       |
| 26 |                  |                                                  |       |
| 27 |                  |                                                  |       |
| 28 |                  |                                                  |       |
| 29 | Main results     | #16a Give unadjusted estimates and, if           | 12    |
| 30 |                  | applicable, confounder-adjusted                  |       |
| 31 |                  | estimates and their precision (eg, 95%           |       |
| 32 |                  | confidence interval). Make clear which           |       |
| 33 |                  | confounders were adjusted for and why            |       |
| 34 |                  | they were included                               |       |
| 35 |                  |                                                  |       |
| 36 |                  |                                                  |       |
| 37 |                  |                                                  |       |
| 38 |                  |                                                  |       |
| 39 |                  |                                                  |       |
| 40 | Main results     | #16b Report category boundaries when             | NA    |
| 41 |                  | continuous variables were categorized            |       |
| 42 |                  |                                                  |       |
| 43 |                  |                                                  |       |
| 44 | Main results     | #16c If relevant, consider translating estimates | NA    |
| 45 |                  | of relative risk into absolute risk for a        |       |
| 46 |                  | meaningful time period                           |       |
| 47 |                  |                                                  |       |
| 48 |                  |                                                  |       |
| 49 |                  |                                                  |       |
| 50 | Other analyses   | #17 Report other analyses done—e.g.,             | NA    |
| 51 |                  | analyses of subgroups and interactions,          |       |
| 52 |                  | and sensitivity analyses                         |       |
| 53 |                  |                                                  |       |
| 54 |                  |                                                  |       |
| 55 |                  |                                                  |       |
| 56 | Discussion       |                                                  |       |
| 57 |                  |                                                  |       |
| 58 |                  |                                                  |       |
| 59 |                  |                                                  |       |
| 60 |                  |                                                  |       |

|    |                  |     |                                               |
|----|------------------|-----|-----------------------------------------------|
| 1  |                  |     |                                               |
| 2  |                  |     |                                               |
| 3  |                  |     |                                               |
| 4  | Key results      | #18 | Summarise key results with reference to 13    |
| 5  |                  |     | study objectives                              |
| 6  |                  |     |                                               |
| 7  |                  |     |                                               |
| 8  | Limitations      | #19 | Discuss limitations of the study, taking 17   |
| 9  |                  |     | into account sources of potential bias or     |
| 10 |                  |     | imprecision. Discuss both direction and       |
| 11 |                  |     | magnitude of any potential bias.              |
| 12 |                  |     |                                               |
| 13 |                  |     |                                               |
| 14 |                  |     |                                               |
| 15 |                  |     |                                               |
| 16 | Interpretation   | #20 | Give a cautious overall interpretation 13-17  |
| 17 |                  |     | considering objectives, limitations,          |
| 18 |                  |     | multiplicity of analyses, results from        |
| 19 |                  |     | similar studies, and other relevant           |
| 20 |                  |     | evidence.                                     |
| 21 |                  |     |                                               |
| 22 |                  |     |                                               |
| 23 |                  |     |                                               |
| 24 |                  |     |                                               |
| 25 | Generalisability | #21 | Discuss the generalisability (external 17     |
| 26 |                  |     | validity) of the study results                |
| 27 |                  |     |                                               |
| 28 |                  |     |                                               |
| 29 | Other            |     |                                               |
| 30 | Information      |     |                                               |
| 31 |                  |     |                                               |
| 32 |                  |     |                                               |
| 33 |                  |     |                                               |
| 34 | Funding          | #22 | Give the source of funding and the role of 17 |
| 35 |                  |     | the funders for the present study and, if     |
| 36 |                  |     | applicable, for the original study on which   |
| 37 |                  |     | the present article is based                  |
| 38 |                  |     |                                               |
| 39 |                  |     |                                               |
| 40 |                  |     |                                               |

540 None The STROBE checklist is distributed under the terms of the Creative  
 541 Commons Attribution License CC-BY. This checklist can be completed online  
 542 using <https://www.goodreports.org/>, a tool made by the EQUATOR Network in  
 543 collaboration with Penelope.ai

544

1  
2  
3  
4  
5  
6  
7  
8  
9  
10  
11  
12  
13  
14  
15  
16  
17  
18  
19  
20  
21  
22  
23  
24  
25  
26  
27  
28  
29  
30  
31  
32  
33  
34  
35  
36  
37  
38  
39  
40  
41  
42  
43  
44  
45  
46  
47  
48  
49  
50  
51  
52  
53  
54  
55  
56  
57  
58  
59  
60

Figure 1 Flow chart of study participants.

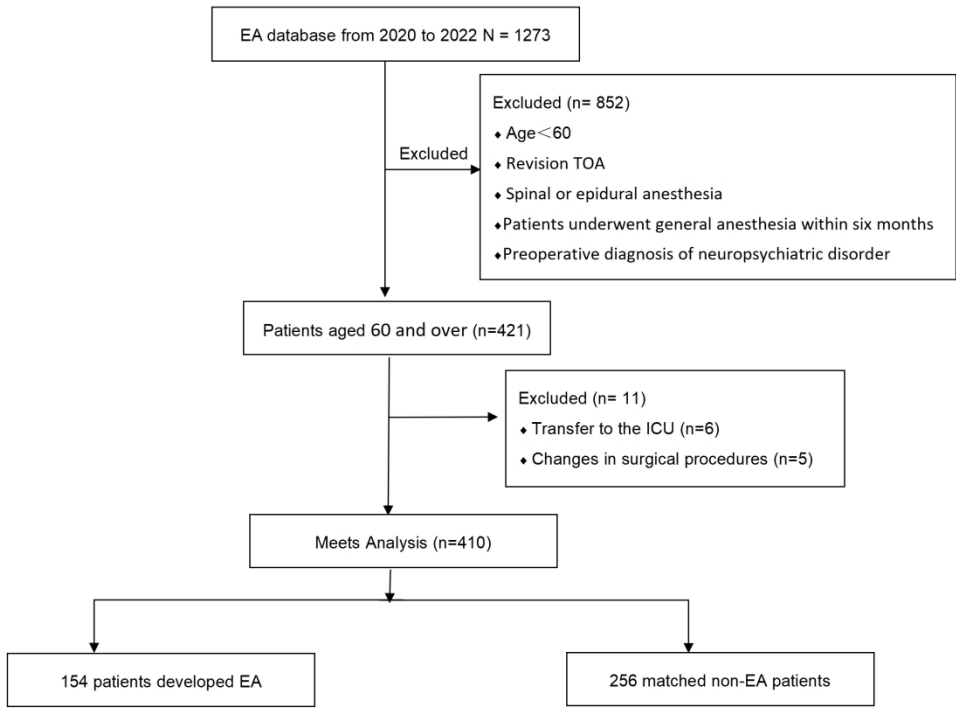

Figure 1 Flow chart of study participants

419x390mm (144 x 144 DPI)

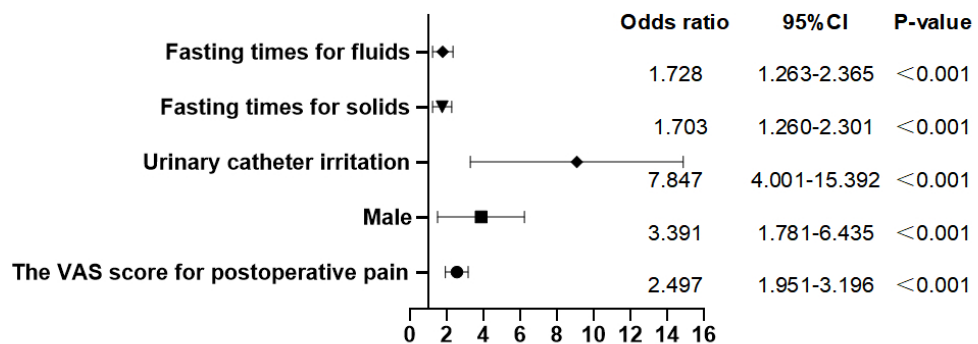

Figure 2 Risk factors of EA by metanalysis plot

436x179mm (57 x 57 DPI)

1  
2  
3  
4  
5  
6  
7  
8  
9  
10  
11  
12  
13  
14  
15  
16  
17  
18  
19  
20  
21  
22  
23  
24  
25  
26  
27  
28  
29  
30  
31  
32  
33  
34  
35  
36  
37  
38  
39  
40  
41  
42  
43  
44  
45  
46  
47  
48  
49  
50  
51  
52  
53  
54  
55  
56  
57  
58  
59  
60

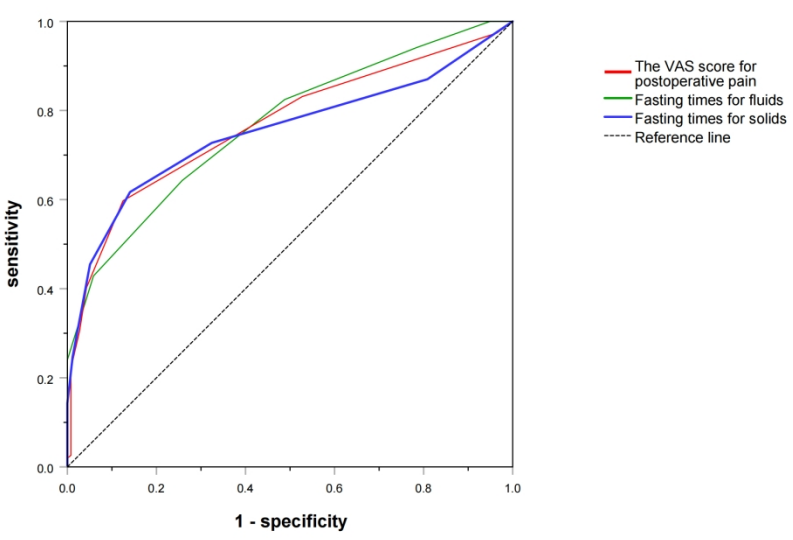

Figure 3 Risk factors of EA by the ROC curve  
1178x667mm (57 x 57 DPI)

## Reporting checklist for cross sectional study.

Based on the STROBE cross sectional guidelines.

### Instructions to authors

Complete this checklist by entering the page numbers from your manuscript where readers will find each of the items listed below.

Your article may not currently address all the items on the checklist. Please modify your text to include the missing information. If you are certain that an item does not apply, please write "n/a" and provide a short explanation.

Upload your completed checklist as an extra file when you submit to a journal.

In your methods section, say that you used the STROBE cross sectional reporting guidelines, and cite them as:

von Elm E, Altman DG, Egger M, Pocock SJ, Gøtzsche PC, Vandenbroucke JP. The Strengthening the Reporting of Observational Studies in Epidemiology (STROBE) Statement: guidelines for reporting observational studies.

|  |                    | Reporting Item                                                                         | Page Number |
|--|--------------------|----------------------------------------------------------------------------------------|-------------|
|  | Title and abstract |                                                                                        |             |
|  | Title              | #1a Indicate the study's design with a commonly used term in the title or the abstract | 1           |
|  | Abstract           | #1b Provide in the abstract an informative and balanced summary of what was done and   | 3           |

what was found

**Introduction**

|    |                      |     |                                                |     |
|----|----------------------|-----|------------------------------------------------|-----|
| 8  | Background /         | #2  | Explain the scientific background and          | 5   |
| 9  | rationale            |     | rationale for the investigation being          |     |
| 10 |                      |     | reported                                       |     |
| 11 |                      |     |                                                |     |
| 12 |                      |     |                                                |     |
| 13 |                      |     |                                                |     |
| 14 | Objectives           | #3  | State specific objectives, including any       | 6   |
| 15 |                      |     | prespecified hypotheses                        |     |
| 16 |                      |     |                                                |     |
| 17 |                      |     |                                                |     |
| 18 | Methods              |     |                                                |     |
| 19 |                      |     |                                                |     |
| 20 |                      |     |                                                |     |
| 21 | Study design         | #4  | Present key elements of study design           | NA  |
| 22 |                      |     | early in the paper                             |     |
| 23 |                      |     |                                                |     |
| 24 |                      |     |                                                |     |
| 25 | Setting              | #5  | Describe the setting, locations, and           | 7   |
| 26 |                      |     | relevant dates, including periods of           |     |
| 27 |                      |     | recruitment, exposure, follow-up, and          |     |
| 28 |                      |     | data collection                                |     |
| 29 |                      |     |                                                |     |
| 30 |                      |     |                                                |     |
| 31 |                      |     |                                                |     |
| 32 |                      |     |                                                |     |
| 33 | Eligibility criteria | #6a | Give the eligibility criteria, and the         | 7   |
| 34 |                      |     | sources and methods of selection of            |     |
| 35 |                      |     | participants.                                  |     |
| 36 |                      |     |                                                |     |
| 37 |                      |     |                                                |     |
| 38 |                      |     |                                                |     |
| 39 |                      | #7  | Clearly define all outcomes, exposures,        | 8   |
| 40 |                      |     | predictors, potential confounders, and         |     |
| 41 |                      |     | effect modifiers. Give diagnostic criteria, if |     |
| 42 |                      |     | applicable                                     |     |
| 43 |                      |     |                                                |     |
| 44 |                      |     |                                                |     |
| 45 |                      |     |                                                |     |
| 46 | Data sources /       | #8  | For each variable of interest give sources     | 8   |
| 47 | measurement          |     | of data and details of methods of              |     |
| 48 |                      |     | assessment (measurement). Describe             |     |
| 49 |                      |     | comparability of assessment methods if         |     |
| 50 |                      |     | there is more than one group. Give             |     |
| 51 |                      |     | information separately for for exposed         |     |
| 52 |                      |     | and unexposed groups if applicable.            |     |
| 53 |                      |     |                                                |     |
| 54 |                      |     |                                                |     |
| 55 |                      |     |                                                |     |
| 56 |                      |     |                                                |     |
| 57 |                      |     |                                                |     |
| 58 |                      |     |                                                |     |
| 59 | Bias                 | #9  | Describe any efforts to address potential      | 8-9 |
| 60 |                      |     |                                                |     |



|    |                  |      |                                               |      |
|----|------------------|------|-----------------------------------------------|------|
|    |                  |      | sources of bias                               |      |
| 1  |                  |      |                                               |      |
| 2  |                  |      |                                               |      |
| 3  |                  |      |                                               |      |
| 4  |                  |      |                                               |      |
| 5  |                  |      |                                               |      |
| 6  | Study size       | #10  | Explain how the study size was arrived at     | 9    |
| 7  |                  |      |                                               |      |
| 8  | Quantitative     | #11  | Explain how quantitative variables were       | 8    |
| 9  | variables        |      | handled in the analyses. If applicable,       |      |
| 10 |                  |      | describe which groupings were chosen,         |      |
| 11 |                  |      | and why                                       |      |
| 12 |                  |      |                                               |      |
| 13 |                  |      |                                               |      |
| 14 |                  |      |                                               |      |
| 15 |                  |      |                                               |      |
| 16 | Statistical      | #12a | Describe all statistical methods, including   | 9-10 |
| 17 | methods          |      | those used to control for confounding         |      |
| 18 |                  |      |                                               |      |
| 19 |                  |      |                                               |      |
| 20 | Statistical      | #12b | Describe any methods used to examine          | 9-10 |
| 21 | methods          |      | subgroups and interactions                    |      |
| 22 |                  |      |                                               |      |
| 23 |                  |      |                                               |      |
| 24 | Statistical      | #12c | Explain how missing data were                 | NA   |
| 25 | methods          |      | addressed                                     |      |
| 26 |                  |      |                                               |      |
| 27 |                  |      |                                               |      |
| 28 | Statistical      | #12d | If applicable, describe analytical methods    | NA   |
| 29 | methods          |      | taking account of sampling strategy           |      |
| 30 |                  |      |                                               |      |
| 31 |                  |      |                                               |      |
| 32 |                  |      |                                               |      |
| 33 | Statistical      | #12e | Describe any sensitivity analyses             | 9-10 |
| 34 | methods          |      |                                               |      |
| 35 |                  |      |                                               |      |
| 36 |                  |      |                                               |      |
| 37 | Results          |      |                                               |      |
| 38 |                  |      |                                               |      |
| 39 |                  |      |                                               |      |
| 40 | Participants     | #13a | Report numbers of individuals at each         | 11   |
| 41 |                  |      | stage of study—eg numbers potentially         |      |
| 42 |                  |      | eligible, examined for eligibility, confirmed |      |
| 43 |                  |      | eligible, included in the study, completing   |      |
| 44 |                  |      | follow-up, and analysed. Give information     |      |
| 45 |                  |      | separately for for exposed and                |      |
| 46 |                  |      | unexposed groups if applicable.               |      |
| 47 |                  |      |                                               |      |
| 48 |                  |      |                                               |      |
| 49 |                  |      |                                               |      |
| 50 |                  |      |                                               |      |
| 51 |                  |      |                                               |      |
| 52 | Participants     | #13b | Give reasons for non-participation at         | 11   |
| 53 |                  |      | each stage                                    |      |
| 54 |                  |      |                                               |      |
| 55 |                  |      |                                               |      |
| 56 | Participants     | #13c | Consider use of a flow diagram                | 32   |
| 57 |                  |      |                                               |      |
| 58 |                  |      |                                               |      |
| 59 | Descriptive data | #14a | Give characteristics of study participants    | 11   |
| 60 |                  |      |                                               |      |

(eg demographic, clinical, social) and information on exposures and potential confounders. Give information separately for exposed and unexposed groups if applicable.

|                  |      |                                                                                                                                                                                                           |       |
|------------------|------|-----------------------------------------------------------------------------------------------------------------------------------------------------------------------------------------------------------|-------|
| Descriptive data | #14b | Indicate number of participants with missing data for each variable of interest                                                                                                                           | 11    |
| Outcome data     | #15  | Report numbers of outcome events or summary measures. Give information separately for exposed and unexposed groups if applicable.                                                                         | 11-13 |
| Main results     | #16a | Give unadjusted estimates and, if applicable, confounder-adjusted estimates and their precision (eg, 95% confidence interval). Make clear which confounders were adjusted for and why they were included. | 12    |
| Main results     | #16b | Report category boundaries when continuous variables were categorized                                                                                                                                     | NA    |
| Main results     | #16c | If relevant, consider translating estimates of relative risk into absolute risk for a meaningful time period                                                                                              | NA    |
| Other analyses   | #17  | Report other analyses done—e.g., analyses of subgroups and interactions, and sensitivity analyses                                                                                                         | NA    |
| Discussion       |      |                                                                                                                                                                                                           |       |
| Key results      | #18  | Summarise key results with reference to study objectives                                                                                                                                                  | 13    |
| Limitations      | #19  | Discuss limitations of the study, taking                                                                                                                                                                  | 17    |

1  
2  
3  
4  
5  
6  
7  
8  
9  
10  
11  
12  
13  
14  
15  
16  
17  
18  
19  
20  
21  
22  
23  
24  
25  
26  
27  
28  
29  
30  
31  
32  
33  
34  
35  
36  
37  
38  
39  
40  
41  
42  
43  
44  
45  
46  
47  
48  
49  
50  
51  
52  
53  
54  
55  
56  
57  
58  
59  
60

|                   |     |                                                                                                                                                                  |       |
|-------------------|-----|------------------------------------------------------------------------------------------------------------------------------------------------------------------|-------|
|                   |     | into account sources of potential bias or imprecision. Discuss both direction and magnitude of any potential bias.                                               |       |
| Interpretation    | #20 | Give a cautious overall interpretation considering objectives, limitations, multiplicity of analyses, results from similar studies, and other relevant evidence. | 13-17 |
| Generalisability  | #21 | Discuss the generalisability (external validity) of the study results                                                                                            | 17    |
| Other Information |     |                                                                                                                                                                  |       |
| Funding           | #22 | Give the source of funding and the role of the funders for the present study and, if applicable, for the original study on which the present article is based    | 17    |

None The STROBE checklist is distributed under the terms of the Creative Commons Attribution License CC-BY. This checklist can be completed online using <https://www.goodreports.org/>, a tool made by the EQUATOR Network in collaboration with Penelope.ai

# BMJ Open

## Risk factors for emergence agitation during the awakening period in elderly patients after total joint arthroplasty: a retrospective cohort study

|                                 |                                                                                                                                                                                                                                                                                                                                                                                                                                                               |
|---------------------------------|---------------------------------------------------------------------------------------------------------------------------------------------------------------------------------------------------------------------------------------------------------------------------------------------------------------------------------------------------------------------------------------------------------------------------------------------------------------|
| Journal:                        | <i>BMJ Open</i>                                                                                                                                                                                                                                                                                                                                                                                                                                               |
| Manuscript ID                   | bmjopen-2022-068284.R3                                                                                                                                                                                                                                                                                                                                                                                                                                        |
| Article Type:                   | Original research                                                                                                                                                                                                                                                                                                                                                                                                                                             |
| Date Submitted by the Author:   | 10-Apr-2023                                                                                                                                                                                                                                                                                                                                                                                                                                                   |
| Complete List of Authors:       | Wang, Naigeng; Xi'an Jiaotong University, Department of Anesthesiology, Honghui Hospital<br>Hao, Jianhong; Xi'an Jiaotong University, Department of Anesthesiology, Honghui Hospital<br>Zhang, Jie; Xi'an Jiaotong University, Department of Anesthesiology, Honghui Hospital<br>Du, Jing; Shaanxi University of Chinese Medicine, Second Clinical Medical College<br>luo, zhenguo; Xi'an Jiaotong University, Department of Anesthesiology, Honghui Hospital |
| <b>Primary Subject Heading</b>: | Anaesthesia                                                                                                                                                                                                                                                                                                                                                                                                                                                   |
| Secondary Subject Heading:      | Anaesthesia                                                                                                                                                                                                                                                                                                                                                                                                                                                   |
| Keywords:                       | Anaesthesia in orthopaedics < ANAESTHETICS, Adult anaesthesia < ANAESTHETICS, Adult orthopaedics < ORTHOPAEDIC & TRAUMA SURGERY, Knee < ORTHOPAEDIC & TRAUMA SURGERY, Hip < ORTHOPAEDIC & TRAUMA SURGERY                                                                                                                                                                                                                                                      |
|                                 |                                                                                                                                                                                                                                                                                                                                                                                                                                                               |

SCHOLARONE™  
Manuscripts

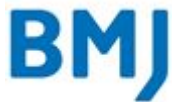

I, the Submitting Author has the right to grant and does grant on behalf of all authors of the Work (as defined in the below author licence), an exclusive licence and/or a non-exclusive licence for contributions from authors who are: i) UK Crown employees; ii) where BMJ has agreed a CC-BY licence shall apply, and/or iii) in accordance with the terms applicable for US Federal Government officers or employees acting as part of their official duties; on a worldwide, perpetual, irrevocable, royalty-free basis to BMJ Publishing Group Ltd ("BMJ") its licensees and where the relevant Journal is co-owned by BMJ to the co-owners of the Journal, to publish the Work in this journal and any other BMJ products and to exploit all rights, as set out in our [licence](#).

The Submitting Author accepts and understands that any supply made under these terms is made by BMJ to the Submitting Author unless you are acting as an employee on behalf of your employer or a postgraduate student of an affiliated institution which is paying any applicable article publishing charge ("APC") for Open Access articles. Where the Submitting Author wishes to make the Work available on an Open Access basis (and intends to pay the relevant APC), the terms of reuse of such Open Access shall be governed by a Creative Commons licence – details of these licences and which [Creative Commons](#) licence will apply to this Work are set out in our licence referred to above.

Other than as permitted in any relevant BMJ Author's Self Archiving Policies, I confirm this Work has not been accepted for publication elsewhere, is not being considered for publication elsewhere and does not duplicate material already published. I confirm all authors consent to publication of this Work and authorise the granting of this licence.

1 **Risk factors for emergence agitation during the awakening**  
2 **period in elderly patients after total joint arthroplasty: a**  
3 **retrospective cohort study**

4 Naigeng Wang<sup>1</sup>, Jianhong Hao<sup>1</sup>, Jie Zhang<sup>1</sup>, Jing Du<sup>2</sup>, Zhenguo Luo<sup>1</sup>

5 <sup>1</sup>Department of Anesthesiology, Honghui Hospital, Xi'an Jiaotong University, Xi'an,  
6 Shaanxi Province, China

7 <sup>2</sup>Second Clinical Medical College, Shaanxi University of Chinese Medicine,  
8 Xianyang, Shaanxi Province, China

9 **Email address for each author:**

10 Naigeng Wang: wang17731131252@163.com,

11 Jianhong Hao: sxzyydx123@sina.com,

12 Jie Zhang: 1771362371@qq.com,

13 Jing Du: 365844276@qq.com

14  
15 **Running title:** EA risk factors after TJA

16  
17 **Keywords:** Emergence agitation; Elderly patients; Risk factors; Total joint  
18 arthroplasty

19  
20 **Corresponding author:** Zhenguo Luo

21 Tel: +86-13709147141

1  
2  
3  
4 22 Email: [luozhenguo@stu.xjtu.edu.cn](mailto:luozhenguo@stu.xjtu.edu.cn)  
5

6 23 Mailing address: Department of Anesthesiology, Honghui Hospital, Xi'an Jiaotong  
7  
8  
9 24 University, No. 555, Youyi East Road, Xi'an, Shaanxi Province, 710054, China.  
10

11 25  
12  
13  
14 26 **IRB number:** 201812001 (Biomedical Research Ethics Committee of Honghui  
15  
16  
17 Hospital)  
18

19 28 **Clinical trial registration number:** ChiCTR1800020193  
20

21  
22 29 **Word count: 3151**  
23  
24  
25

26 30  
27

28 31  
29

30 32  
31

32 33  
33

34 34  
35

36 35  
37

38 36  
39

40 37  
41

42 38  
43

44 39  
45

46 40  
47

48 41  
49

50 42  
51  
52  
53  
54  
55  
56  
57  
58  
59  
60

1  
2  
3  
4 43 **Abstract**

5  
6 44 **Objectives:** This study aimed to explore the incidence and risk factors for emergence  
7  
8  
9 45 agitation (EA) in elderly patients who underwent total joint arthroplasty (TJA) under  
10  
11  
12 46 general anaesthesia, and to assess their predictive values.

13  
14 47 **Design:** Single-centre retrospective cohort study.

15  
16  
17 48 **Setting:** A 1,600-bed general tertiary hospital in China.

18  
19 49 **Participants:** This study enrolled 421 elderly patients scheduled for elective primary  
20  
21  
22 50 TJA under general anaesthesia.

23  
24 51 **Primary and Secondary Outcome Measures:** EA was assessed using the Richmond  
25  
26  
27 52 Agitation Sedation Scale during the awakening period after surgery in the  
28  
29  
30 53 postanaesthesia care unit(PACU). Risk factors for EA were identified using univariate  
31  
32  
33 54 and multivariable logistic analyses. The receiver operating characteristic curve (ROC)  
34  
35  
36 55 was used to assess the predictive values of the risk factors for EA.

37  
38 56 **Results:** The incidence of EA in elderly patients who underwent TJA was 37.6%.  
39  
40  
41 57 According to the multivariable logistic analysis, postoperative pain (95% confidence  
42  
43 58 interval [CI]: 1.951–3.196), male sex (95% CI: 1.781–6.435), catheter-related bladder  
44  
45 59 discomfort (CRBD) (95% CI: 4.001–15.392), and longer fasting times for solids (95%  
46  
47  
48 60 CI: 1.260–2.301) and fluids (95% CI: 1.263–2.365) were independent risk factors for  
49  
50  
51 61 EA. As shown by the ROC analysis, postoperative pain and fasting times for solids  
52  
53  
54 62 and fluids had good predictive values,with areas under the ROC curve (AUCs)  
55  
56  
57 63 equalling 0.769, 0.753 and 0.768,respectively.



1  
2  
3  
4 64 **Conclusions:** EA is a common complication after TJA in elderly patients. Some risk  
5  
6 65 factors, including postoperative pain, male sex, CRBD, and longer fasting times, can  
7  
8  
9 66 increase the incidence of EA. These risk factors may contribute to identifying  
10  
11 67 high-risk patients, which facilitates the development of effective strategies to prevent  
12  
13  
14 68 and treat EA.  
15  
16  
17 69  
18  
19  
20 70  
21  
22 71 **Keywords:** Emergence agitation; Elderly patients; Risk factors; Total joint  
23  
24 72 arthroplasty  
25  
26  
27 73  
28  
29  
30 74 **Strengths and Limitations:**  
31

- 32 75 ➤ .In this study, the medical records of 421 patients who underwent TJA were  
33  
34 76 reviewed. Univariate and multivariable logistic analyses were used to identify the  
35  
36 77 risk factors of EA, and the ROC was used to evaluate the predictive values of the  
37  
38 78 risk factors.  
39  
40 79 ➤ This work was a single-centre retrospective study, and the generalizability of the  
41  
42 80 results is weak.  
43  
44 81 ➤ Only patients with one category of arthritis were studied.  
45  
46  
47 82  
48  
49 83  
50  
51 84  
52  
53  
54  
55  
56  
57  
58  
59  
60

## 85 **Introduction**

86 Emergence agitation (EA), a common complication during the awakening period  
87 after general anaesthesia, refers to a temporary state of mental and motor excitement  
88 [1]. Clinical features of EA include disorientation, excitation, agitation, and  
89 combative behaviours [2,3]. The incidence of EA in adults varies from 4.7% to 74%  
90 [4]. EA can also increase the risk of wound bleeding or dehiscence, self-extubation,  
91 falling out of bed, and violent behaviour towards staff [5]. It may also prolong the  
92 patient's stay in the PACU and increase the demand for medical staff, resulting in  
93 higher medical costs [6]. Elderly individuals are one of the main population groups  
94 affected by EA [7]. Cardiovascular and cerebrovascular diseases are common in  
95 elderly individuals [8]. Thus, EA may have more serious adverse consequences for  
96 elderly patients[5].

97 Total joint arthroplasty (TJA) is a successful treatment protocol for end-stage  
98 knee and hip osteoarthritis (OA) [9]. Annually, more than 1 million people undergo  
99 TJA in the United States [10]. As the population ages, the demand for TJA surgery  
100 is expected to increase substantially in the coming years [11]. Most patients suffer  
101 from moderate-to-severe pain after TJA[12], which is one of the risk factors for EA  
102 in adult patients[3,13-14]. The incidence and risk factors for EA in adults vary  
103 depending on the surgery[15-17]; however, reports on the incidence and risk factors  
104 for EA after TJA are lacking.

1  
2  
3  
4 105 In this study, we retrospectively collected the medical records of 421 elderly  
5  
6 106 patients who underwent general anaesthesia for TJA. We aimed to determine the  
7  
8  
9 107 incidence and risk factors of postoperative EA in elderly patients, to assess the  
10  
11  
12 108 predictive values, and provide guidance for preventing and treating EA.  
13  
14 109

15  
16  
17  
18  
19  
20  
21  
22  
23  
24  
25  
26  
27  
28  
29  
30  
31  
32  
33  
34  
35  
36  
37  
38  
39  
40  
41  
42  
43  
44  
45  
46  
47  
48  
49  
50  
51  
52  
53  
54  
55  
56  
57  
58  
59  
60

For peer review only

## 110 **Materials and methods**

### 111 *Ethics statement*

112 This study was approved by the Biomedical Research Ethics Committee of our  
113 hospital (approval no. 201812001), and the trial was registered in the Chinese Clinical  
114 Registry (ChiCTR, 1800020193). All methods were performed according to relevant  
115 guidelines and regulations. The study obtained consent to gather patients' medical  
116 record information through telephone follow-up.

### 117 *Patients*

118 We enrolled 421 patients who underwent TJA under general anaesthesia at our  
119 hospital from December 2019 to June 2021. Inclusion criteria  
120 included (1) preoperative OA diagnosis, (2) age  $\geq$  60 years, (3) American Society of  
121 Anaesthesiologists (ASA) physical status I–III, and (4) having undergone scheduled  
122 elective primary TJA under general anaesthesia. Patients with any of the following  
123 conditions were excluded: revision TJA, spinal or epidural anaesthesia, general  
124 anaesthesia within the past 6 months, and preoperative diagnosis of neuropsychiatric  
125 disorder.

### 126 *Routine practice of perioperative management*

127 Anaesthesia was induced with intravenous midazolam, etomidate, sufentanil, and  
128 rocuronium. Tracheal intubation was completed after 2 min. Ultrasound-guided

1  
2  
3  
4 129 femoral nerve block (FNB) was performed in patients undergoing total knee  
5  
6 130 replacement (TKA), while ultrasound-guided fascia iliac compartment block (FICB)  
7  
8  
9 131 was performed in patients undergoing total hip replacement (THA). All 20-ml (0.5%)  
10  
11 132 ropivacaine solutions were infused into the nerve block. Urinary catheterisation was  
12  
13  
14 133 performed in all patients after inducing anaesthesia. Anaesthesia was maintained  
15  
16  
17 134 using intravenous remifentanyl and propofol. Patients were transferred to the PACU  
18  
19  
20 135 after the operation. These patients were extubated in the PACU.

21  
22 136 Speciality nurses assessed all patients in the PACU using a standardised  
23  
24 137 protocol, including the visual analogue scale (VAS), Richmond Agitation Sedation  
25  
26  
27 138 Scale (RASS), and Steward recovery scores. VAS was used to assess postoperative  
28  
29  
30 139 pain, and intravenous flurbiprofen was administered as an analgesic rescue when the  
31  
32 140 VAS score was  $> 4$ . EA was evaluated using the RASS [18], and Table 1 presents the  
33  
34  
35 141 score criteria. Patients with a RASS score  $> 1$  were considered to have EA [18].  
36  
37  
38 142 Dexmedetomidine was administered in cases of severe agitation (RASS = 4). Patients  
39  
40 143 with ward recovery scores  $> 4$  were transferred to the ward from the PACU.  
41  
42

43 144

#### 45 145 ***Data collection***

46  
47  
48 146 The following patient-related variables were recorded: (1) population data and  
49  
50  
51 147 medical history, including age, sex, body mass index (BMI), ASA classification,  
52  
53  
54 148 education level, history of heart disease, respiratory disease, hypertension, and  
55  
56  
57 149 diabetes; (2) perioperative clinical information, including operation type and times,  
58  
59 150 body temperature after the surgery, VAS score, catheter-related bladder discomfort

1  
2  
3  
4 151 (CRBD), preoperative fasting times, intraoperative blood loss, warm treatment,  
5  
6 152 postoperative nausea and vomiting, duration in PACU, RASS score, and severe  
7  
8  
9 153 intraoperative hypotension (mean arterial pressure < 65 mmHg for at least 1 min); and  
10  
11  
12 154 (3) laboratory tests. Preoperative fasting time refers to the period from the last intake  
13  
14 155 of liquids or solids to the beginning of anaesthesia induction.  
15  
16

17 156

### 19 157 *Statistical analysis and sample size*

22 158 The sample size was calculated using GPower software version 3.1 (Franz Faul,  
23  
24 159 University of Kiel, Kiel, Germany). The effect size was set to 0.3,  $\alpha$  level to 0.05, and  
25  
26  
27 160 1- $\beta$  to 0.85. A sample size of 100 patients was the optimal sample size needed to  
28  
29  
30 161 prove the difference between the two groups. Considering the easy acquisition of  
31  
32 162 electronic medical records, we included patients who met the inclusion and exclusion  
33  
34  
35 163 criteria between December 2019 and June 2020.  
36

37 164 Statistical analysis was performed using SPSS version 26.0 (SPSS Inc.,  
38  
39  
40 165 Chicago, IL, USA). Continuous data were presented as the means  $\pm$  standard  
41  
42  
43 166 deviations, and categorical data were presented as numbers and percentages.  
44  
45  
46 167 Independent risk factors were identified using univariate and multivariable logistic  
47  
48 168 regression analyses. The measurement data were assessed for normal and nonnormal  
49  
50  
51 169 distributions. Two independent sample t tests were used to determine the differences  
52  
53  
54 170 between groups for continuous variables with a normal distribution. The  
55  
56 171 nonparametric Mann–Whitney U test was used to compare differences between  
57  
58  
59 172 groups for continuous variables with nonnormal distributions. Chi-square tests were  
60

1  
2  
3  
4 173 used to determine differences between groups for categorical data. Variables with  $P <$   
5  
6 174 0.2 were entered in multivariable logistic regression analysis. A positive stepwise  
7  
8  
9 175 method was used to adjust for multiple risk factors. Each variable was expressed as an  
10  
11  
12 176 odds ratio (OR) with a 95% confidence interval (CI). The predictive value of the risk  
13  
14 177 factors for EA was assessed using the receiver operating characteristic (ROC) curve.  
15  
16  
17 178 The cut-off point was calculated based on the maximum Youden index value.  
18  
19 179 Statistical significance was set at a  $P$  value  $< 0.05$ .

20  
21  
22 180

### 23 24 181 ***Patient and public involvement***

25  
26  
27 182 None of the patients were involved in the design, data provision, analysis, or  
28  
29  
30 183 publication of the study.  
31  
32  
33  
34  
35  
36  
37  
38  
39  
40  
41  
42  
43  
44  
45  
46  
47  
48  
49  
50  
51  
52  
53  
54  
55  
56  
57  
58  
59  
60

## 184 **Results**

### 185 *General information on the study population*

186 In total, 421 patients met the inclusion and exclusion criteria. However, 11  
187 patients were excluded from the study; six were transferred to the intensive care unit  
188 (ICU) postoperatively, and the surgical protocols of five patients were changed during  
189 the operation. Finally, the statistical analysis included 410 patients (Fig. 1). The  
190 incidence of EA was 37.6% (n = 154) in 410 patients. All patients (n = 410) were  
191 divided into two groups: EA and non-EA. Age, BMI, ASA classification, education  
192 level, and medical history did not significantly differ between the two groups (Table  
193 2). The EA group had a significantly higher proportion of male patients than the  
194 non-EA group (P < 0.05).

### 196 *Perioperative clinical information and laboratory tests*

197 Univariate analysis demonstrated significant differences between the EA and  
198 non-EA groups in the VAS score for postoperative pain, body temperature after the  
199 surgery, CRBD, preoperative fasting times, and length of stay in the PACU.

200 Compared with the non-EA group, the VAS score was higher (P < 0.05), body  
201 temperature after the surgery was lower (P < 0.05), and the patient's length of stay in  
202 the PACU and preoperative fasting times were longer in the EA group (P < 0.05).  
203 Moreover, 77.3% (119/154) of patients in the EA group had CRBD, while 32.4%  
204 (83/256) of patients in the non-EA group experienced CRBD. This variable differed



1  
2  
3  
4 205 significantly between the two groups ( $P < 0.05$ ). Additionally, no significant  
5  
6 206 differences were observed between the two groups regarding surgery type and times,  
7  
8  
9 207 intraoperative blood loss, intraoperative hypotension, warm treatment, and laboratory  
10  
11 208 tests (Table 3).

12  
13  
14 209

### 15 16 17 210 ***Multivariable logistic regression analysis***

18  
19 211 Based on the univariate analysis, variables included in the multivariable logistic  
20  
21 212 regression analysis included the VAS score for postoperative pain, male sex, body  
22  
23 213 temperature after the surgery, length of stay in the PACU, preoperative fasting times,  
24  
25 214 and CRBD.

26  
27  
28  
29 215 The correlation between the VAS score for postoperative pain, male sex,  
30  
31 216 preoperative fasting times, CRBD, and EA after TJA could be determined based on  
32  
33 217 multivariable logistic analysis (Fig. 2). The VAS score for postoperative pain (OR =  
34  
35 218 2.497; 95% CI: 1.951–3.196), male sex (OR = 3.391; 95% CI: 1.781–6.435), CRBD  
36  
37 219 (OR = 7.847; 95% CI: 4.001–15.392), fasting times for solids (OR = 1.703; 95% CI:  
38  
39 220 1.260–2.301), and fasting times for fluids (OR = 1.728; 95% CI: 1.263–2.365) were  
40  
41 221 independent risk factors. However, we could not confirm the independence of  
42  
43 222 variables, such as body temperature after the surgery and length of stay in the PACU,  
44  
45 223 in the multivariable logistic analysis.

46  
47  
48  
49  
50  
51 224

### 52 53 54 225 ***Results of ROC curves for risk factors***

1  
2  
3  
4 226 The predictive value analysed using the ROC curve is demonstrated in Fig. 3.  
5  
6 227 The area under the ROC curve (AUC) for the VAS score was 0.769, with a cut-off  
7  
8  
9 228 value of 4.0, sensitivity of 60%, and specificity of 87% (95% CI: 0.718–0.819,  $P <$   
10  
11  
12 229 0.001). The AUC of fasting times for solids was 0.753, with a cut-off value of 10.5,  
13  
14  
15 230 sensitivity of 62%, and specificity of 86% (95% CI: 0.699–0.807,  $P <$  0.001). The  
16  
17 231 AUC of fasting times for fluids was 0.768, with a cut-off value of 8.5, sensitivity of  
18  
19  
20 232 64%, and specificity of 74% (95% CI: 0.719–0.816,  $P <$  0.001).  
21  
22  
23  
24  
25

## 26 234 **Discussion**

27  
28  
29 235 The results of this study indicated that EA was a common postoperative  
30  
31 236 complication in patients who underwent general anaesthesia for TJA. Furthermore,  
32  
33  
34 237 this study identified four risk factors associated with with EA in elderly patients who  
35  
36  
37 238 underwent TJA, including postoperative pain, CRBD, male sex, and preoperative  
38  
39 239 fasting times.

40  
41  
42 240 The incidence of EA was 37.6% in elderly patients who underwent TJA. To our  
43  
44  
45 241 knowledge, this report is the first on the incidence of EA in elderly patients who have  
46  
47 242 undergone TJA. Previous research has shown that the incidence of EA varies widely.  
48  
49  
50 243 A prospective study demonstrated that 13.9% (158/1136) of adult patients had EA in  
51  
52 244 the PACU [19]. Xi et al. [7] reported that the incidence of EA in elderly patients who  
53  
54  
55 245 underwent gastrointestinal surgery was 40%. Moreover, an extremely high proportion  
56  
57 246 of patients, 90.5% (19/21), experienced EA because of the effects of succinylcholine  
58  
59  
60

1  
2  
3  
4 247 [20]. These large differences may be attributed to the types of surgery, anaesthetic  
5  
6 248 management, patient characteristics, and assessment methods.  
7  
8

9 249 Many scales are available to assess EA in adults, including the RASS, Ricker  
10  
11 250 Sedation-Agitation Scale (RSAS), Aono's 4-point scale and so on. Unlike the  
12  
13  
14 251 excellent reliability and validity in assessing sedation and agitation in the ICU [18],  
15  
16  
17 252 the reliability and validity of the RASS in the PACU have not been validated;  
18  
19  
20 253 Nevertheless, the RASS is easy to use and administer and has discrete criteria [18].  
21  
22 254 Thus, we believe that RASS is a effective and efficient method of assessing EA in the  
23  
24  
25 255 PACU. Similarly, Makarem et al. [19] and Xi et al. [7] also chose the RASS to assess  
26  
27 256 EA in the PACU.  
28  
29

30 257 Almost all researchers agree that postoperative pain is an independent risk factor  
31  
32 258 for EA. Pain, an uncomfortable emotional experiences, can lead to some complex  
33  
34  
35 259 neurobehavioural effects, such as agitation [21]. Our study demonstrated that the VAS  
36  
37  
38 260 scores of patients in the EA group were higher than those in the non-EA group, and a  
39  
40  
41 261 postoperative pain VAS score  $\geq 4$  was the cut-off point for EA. Pain after TJA is  
42  
43  
44 262 common, and several studies have discovered that more than 50% of patients have  
45  
46  
47 263 suboptimal pain management afterTHA, and 75% of patients undergoing TKA  
48  
49  
50 264 complain of moderate-to-severe pain [12,22]. In this study, 72% (295/410) of patients  
51  
52  
53 265 complained of pain, and 5% (21/410) of patients experienced severe pain, comparable  
54  
55  
56 266 to the results of previous reports. Yu et al. [23] found that nearly half of patients had  
57  
58  
59 267 EA because of insufficient postoperative analgesia. Peripheral nerve blocks (PNBs)  
60  
268 can provide excellent analgesia [24]. In our study, FNB was routinely used in patients

1  
2  
3  
4 269 undergoing TKA, and FICB was used for THA to improve postoperative analgesia.  
5  
6  
7 270 However, due to anatomic variations and individual characteristics, PNBs may not  
8  
9 271 absolutely eliminate pain in patients undergoing TJA, leading to some patients  
10  
11 272 experiencing EA due to postoperative pain in the study. Moreover, sore throat and  
12  
13  
14 273 catheter-related pain should not be ignored because postoperative pain is not limited  
15  
16  
17 274 to wound pain. Based on these findings, we strongly suggest that multimodal  
18  
19 275 analgesia should be performed to benefit patients, especially with preventive  
20  
21  
22 276 analgesia.

23  
24  
25 277 The placement of an indwelling catheter is a common clinical procedure in the  
26  
27 278 perioperative period. The collected urine is used for urine measurements and blood  
28  
29  
30 279 volume evaluation. However, patients with indwelling catheters are prone to CRBD  
31  
32 280 [25]. CRBD is characterised by discomfort confined to the suprapubic region, burning  
33  
34  
35 281 sensation, pain, and urinary urgency and frequency [26,27]. CRBD can occur in 47–  
36  
37  
38 282 90% of patients with an indwelling catheter [5] and CRBD can increase the incidence  
39  
40  
41 283 of EA and pain sensation after surgery [28]. A retrospective study reported that  
42  
43 284 approximately 10% of patients experienced EA during urological surgery, possibly  
44  
45 285 related to CRBD [16]. In our study, 28.0% (119 of 410) of patients experienced EA  
46  
47  
48 286 due to CRBD, and the higher incidence of EA may be due to the age of the recruited  
49  
50  
51 287 patients. This is because age  $\geq 50$  years was an independent predictor of CRBD [29].  
52  
53 288 Indwelling catheters as a risk factor for EA have been reported previously in the  
54  
55 289 literature [30]. Early removal of indwelling catheters is helpful in decreasing EA  
56  
57  
58 290 associated with CRBD.

1  
2  
3  
4  
5  
6  
7  
8  
9  
10  
11  
12  
13  
14  
15  
16  
17  
18  
19  
20  
21  
22  
23  
24  
25  
26  
27  
28  
29  
30  
31  
32  
33  
34  
35  
36  
37  
38  
39  
40  
41  
42  
43  
44  
45  
46  
47  
48  
49  
50  
51  
52  
53  
54  
55  
56  
57  
58  
59  
60

291           Regarding the effect of sex on EA, the results of the study are similar to those of  
292 reported in other literatures in which male sex was identified as an independent risk  
293 factor for EA [29]. This observation could be explained by several factors. First, male  
294 patients were high-risk patients with CRBD [29]. Half of all men aged  $\geq 50$  years and  
295 over 80% of men aged  $\geq 80$  years have prostatic hyperplasia, which can easily cause  
296 discomfort and pain when the catheter tip contacts the bladder triangle on the pubis  
297 [31]. Thus, male patients especially have difficulty tolerating the discomfort associated  
298 with catheters during the awakening period of anaesthesia. Furthermore, male patients  
299 have low postoperative pain tolerance, requiring more analgesics than female patients  
300 [32].

301           Preoperative fasting is one of the preoperative instructions for patients. Whether  
302 preoperative fasting is a risk factor for EA has not been reported in previous studies..  
303 Prolonged preoperative fasting can cause metabolic, physical, and psychological  
304 discomfort in patients, eventually leading to abnormal neurobehavioural changes,  
305 such as postoperative delirium (PD) [33]. However, EA was not analysed. In this  
306 study, the fasting times of the EA group were significantly longer than those of the  
307 non-EA group and exceeded conventional fasting times (no more than 8 hours for  
308 solids and no more than 6 hours for liquids before surgery) [34]. Furthermore, 10.5 h  
309 (fasting times for solids) and 8.6 h (fasting times for fluids) are cut-off points for EA.  
310 Prolonged preoperative fasting times led to patient anxiety, and the degree of anxiety  
311 was related to the length of fasting time [34]. While preoperative anxiety has been  
312 reported as a risk factor for EA [16]. Due to the numerous patients and the lack of

1  
2  
3  
4 313 medical resources, patients may often experienced longer fasting times than they were  
5  
6 314 advised .To reduce the incidence of EA, effective preoperative education and  
7  
8  
9 315 scientific operation schedule lists should be developed.  
10

11 316 This study had some limitations. Firstly, we only included elderly patients who  
12  
13  
14 317 had undergone intravenous anaesthesia. Future studies may utilize other methods and  
15  
16  
17 318 anaesthetics. Secondly, this was a single-centre study; therefore, the generalisability  
18  
19 319 of the results was not fully verified. Future multi-centre studies must assess external  
20  
21  
22 320 validity. Lastly, this is a retrospective cohort study; some bias is unavoidable. Future  
23  
24  
25 321 prospective cohort studies should evaluate and validate the risk factors for EA  
26  
27 322 identified by our study.  
28

29  
30 323• .  
31

32  
33 324  
34

## 35 325 **Conclusions**

36  
37 326 In short, this retrospective study showed that EA is a common complication in  
38  
39  
40 327 elderly patients after TJA .EA occurred in 37.6% of the elderly patients who  
41  
42  
43 328 underwent TJA. Postoperative pain, CRBD, male sex, and preoperative fasting times  
44  
45  
46 329 were independent predictors of EA.These risk factors may contribute to identifying  
47  
48 330 high-risk patients to develop effective strategies to prevent and treat EA. Agitation  
49  
50 331 has many causes [35]; therefore, the optimal clinical strategies should be multimodal.  
51

52  
53 332  
54

55  
56 333 **Contributorship statements:** Zhenguo Luo and Jianhong Hao have made substantial  
57  
58 334 contributions to the conception or design of the manuscript. Naigeng Wang wrote this  
59

1  
2  
3  
4 335 manuscript and made some changes after review. Furthermore, he worked with Jing  
5  
6  
7 336 Du and Jie Zhang to acquire, analyse, and interpret the data. All authors have  
8  
9  
10 337 participated in drafting the manuscript, and Zhenguo Luo revised it critically. All  
11  
12 338 authors contributed equally to the manuscript and read and approved the final version  
13  
14 339 of the manuscript.

15  
16  
17 340

18  
19 341 **Competing interest:** No potential conflict of interest relevant to this article was  
20  
21  
22 342 reported.

23  
24  
25 343

26  
27 344 **Funding:** This work was supported by the Key Research and Development Program  
28  
29  
30 345 of Shaanxi, China (2019SF-205, 2022SF-149).

31  
32  
33 346

34  
35 347 **Data sharing statement :** No additional data are available.

36  
37  
38 348

39  
40 349 **Ethics statements :** This study was approved by the Biomedical Research Ethics  
41  
42  
43 350 Committee of our hospital (approval no. 201812001). The study obtained consent to  
44  
45  
46 351 gather patients' medical record information through telephone follow-up.

47  
48  
49 352

50  
51 353 **Acknowledgement:** We would like to thank Editage ([www.editage.cn](http://www.editage.cn)) for English  
52  
53  
54 354 language editing.

## References

1. Yang X, Hu Z, Peng F, et al. Effects of dexmedetomidine on emergence agitation and recovery quality among children undergoing surgery under general anesthesia: a meta-analysis of randomized controlled trials. *Front Pediatr.* 2020;8: 580226.
2. Shi Y, Zhang X, Sun Y, et al. Emergence agitation after the cleft lip or palate surgery in pediatric patients: a prospective study. *J Stomatol Oral Maxillofac Surg.* 2021;122(6): 539-543.
3. Kim H-J, Kim D-K, Kim H-Y, et al. Risk factors of emergence agitation in adults undergoing general anesthesia for nasal surgery. *Clin Exp Otorhinolaryngol.* 2015;8(1): 46-51.
4. Feng Z, Shi X, Yan X, et al. Comparing the effects of dexmedetomidine versus propofol on the treatment of emergence agitation in adult patients after general anesthesia: study protocol for a randomized, superiority, controlled trial (DP-TEA Trial). *Trials.* 2021;16;22(1):811
5. Zhou H, Pan Y, Liu C, et al. Emergence agitation after intraoperative neurolytic celiac plexus block with alcohol: a case report. *BMC Anesthesiol.* 2021;21(1): 204.
6. Lee SJ, Sung TY. Emergence agitation: current knowledge and unresolved questions. *Korean J Anesthesiol.* 2020;73(6):471-485.



1  
2  
3  
4  
5  
6  
7  
8  
9  
10  
11  
12  
13  
14  
15  
16  
17  
18  
19  
20  
21  
22  
23  
24  
25  
26  
27  
28  
29  
30  
31  
32  
33  
34  
35  
36  
37  
38  
39  
40  
41  
42  
43  
44  
45  
46  
47  
48  
49  
50  
51  
52  
53  
54  
55  
56  
57  
58  
59  
60

- 375 7 Mei X, Tong J. The plasma levels of brain-derived neurotrophic factor  
376 are positively associated with emergence agitation in the elderly after  
377 gastrointestinal surgery. *J Anesth.* 2016;30(5): 811-816.
- 378 8 Sun M, Peng T, Sun Y, et al. Intraoperative use of low-dose  
379 dexmedetomidine for the prevention of emergence agitation following  
380 general anaesthesia in elderly patients: a randomized controlled trial.  
381 *Aging Clin Exp Res.* 2022;34(3):611-618.
- 382 9. Niu R, Egan C, Fang C, et al. Total joint arthroplasty in homeless patients at  
383 an urban safety net hospital. *J Am Acad Orthop Surg.* 2022;30(11):523-527.
- 384 10. Katz JN, Arant KR, Loeser RF. Diagnosis and treatment of hip and knee  
385 osteoarthritis: a review. *JAMA.* 2021;325(6): 568-578.
- 386 11. Zhou Q, Zhou X, Zhang Y, et al. Predictors of postoperative delirium in  
387 elderly patients following total hip and knee arthroplasty: a systematic review  
388 and meta-analysis. *BMC Musculoskelet Disord.* 2021;22(1): 945
- 389 12. De Luca ML, Ciccarello M, Martorana M, et al. Pain monitoring and  
390 management in a rehabilitation setting after total joint replacement.  
391 *Medicine (Baltimore).* 2018;97(40): e12484.
- 392 13. Wei B, Feng Y, Chen W, et al. Risk factors for emergence agitation in adults  
393 after general anesthesia: A systematic review and meta-analysis. *Acta*  
394 *Anaesthesiol Scand.* 2021;65(6):719-729.
- 395 14. Demir CY, Yuzkat N. Prevention of Emergence Agitation with  
396 Ketamine in Rhinoplasty. *Aesthetic Plast Surg.* 2018;42(3):847-853.

- 1  
2  
3  
4 397 15. Tolly B, Waly A, Peterson G, et al. Adult Emergence Agitation: A  
5  
6 398 Veteran-Focused Narrative Review. *Anesth Analg*.  
7  
8  
9 399 2021,1;132(2):353-364  
10  
11 400 16. Kim HC, Kim E, Jeon YT, et al. Postanaesthetic emergence agitation in  
12  
13  
14 401 adult patients after general anaesthesia for urological surgery. *J Int*  
15  
16 402 *Med Res*. 2015;43(2):226-35.  
17  
18  
19 403 17. Kang X, Lin K, Tang H, et al. Risk Factors for Emergence Agitation in Adults  
20  
21  
22 404 Undergoing Thoracoscopic Lung Surgery: A Case-Control Study of 1,950  
23  
24 405 Patients. *J Cardiothorac Vasc Anesth*. 2020;34(9):2403-2409.  
25  
26  
27 406 18. Sessler CN, Gosnell MS, Grap MJ, et al. The Richmond Agitation-Sedation  
28  
29 407 Scale: validity and reliability in adult intensive care unit patients. *Am J Respir*  
30  
31 408 *Crit Care Med*. 2002;166(10): 1338-1344.  
32  
33  
34 409 19. Makarem J, Larijani AH, Eslami B, et al. Risk factors of inadequate  
35  
36 410 emergence following general anesthesia with an emphasis on patients with  
37  
38 411 substance dependence history. *Korean J Anesthesiol*. 2020;73(4): 302-310.  
39  
40  
41 412 20. Lee S-J, Sung T-Y, Cho C-K. Comparison of emergence agitation between  
42  
43 413 succinylcholine and rocuronium-sugammadex in adults following closed  
44  
45 414 reduction of a nasal bone fracture: a prospective randomized controlled trial.  
46  
47 415 *BMC Anesthesiol*. 2019;19(1): 228.  
48  
49  
50  
51 416 21. Menser C, Smith H. Emergence Agitation and Delirium: Considerations for  
52  
53 417 Epidemiology and Routine Monitoring in Pediatric Patients. *Local Reg Anesth*.  
54  
55 418 2020;27;13:73-83.  
56  
57  
58  
59  
60

- 1  
2  
3  
4 419 22. Erlenwein J, Müller M, Falla D, et al. Clinical relevance of persistent  
5  
6 420 postoperative pain after total hip replacement - a prospective observational  
7  
8  
9 421 cohort study. *J Pain Res.* 2017;10: 2183-2193.  
10  
11  
12 422 23. Yu D, Chai W, Sun X, et al. Emergence agitation in adults: risk factors in  
13  
14 423 2,000 patients. *Can J Anaesth.* 2010;57(9):843-8.  
15  
16  
17 424 24. Dotto A, Dunsmuir D, Sun T, et al. The use of the Panda-Nerve Block pain app  
18  
19 425 in single-shot peripheral nerve block patients: a feasibility study. *Can J*  
20  
21  
22 426 *Anaesth.* 2020;67(9):1140-1151.  
23  
24  
25 427 25. Jang EB, Hong SH, Kim KS, et al. Catheter-related bladder discomfort: how  
26  
27 428 can we manage it? *Int Neurorol J.* 2020;24(4): 324-331.  
28  
29  
30 429 26. Bach H, Kaasby K, Sørensen A, et al. Incidence and severity of  
31  
32 430 catheter-related bladder discomfort among nonurological adult patients in a  
33  
34  
35 431 postanesthesia care unit. *J Perianesth Nurs.* 2020;35(1): 29-33.  
36  
37  
38 432 27. Kim D-H, Park J-Y, Yu J, et al. Intravenous lidocaine for the prevention of  
39  
40 433 postoperative catheter-related bladder discomfort in male patients undergoing  
41  
42  
43 434 transurethral resection of bladder tumors: a randomized, double-blind,  
44  
45  
46 435 controlled trial. *Anesth Analg.* 2020;131(1): 220-227.  
47  
48  
49 436 28. Binhas M, Motamed C, Hawajri N, et al. Predictors of catheter-related bladder  
50  
51 437 discomfort in the post-anaesthesia care unit. *Ann Fr Anesth Reanim.*  
52  
53 438 2011;30(2): 122-125.  
54  
55  
56 439 29. Li SY, Song LP, Ma YS, et al. Predictors of catheter-related bladder  
57  
58 440 discomfort after gynaecological surgery. *BMC Anesthesiol.* 2020;20(1): 97.

- 1  
2  
3  
4 441 30. Fields A, Huang J, Schroeder D, et al. Agitation in adults in the  
5  
6 442 post-anaesthesia care unit after general anaesthesia. *Br J*  
7  
8  
9 443 *Anaesth*. 2018;121:1052–8.
- 10  
11 444 31. Chughtai B, Forde JC, Thomas DDM, et al. Benign prostatic hyperplasia. *Nat*  
12  
13  
14 445 *Rev Dis Primers*. 2016;2: 16031.
- 15  
16  
17 446 32. Tsui SL, Tong WN, Irwin M, et al. The efficacy, applicability and side-effects  
18  
19 447 of postoperative intravenous patient-controlled morphine analgesia: an audit of  
20  
21  
22 448 1233 Chinese patients. *Anaesth Intensive Care*. 1996;24(6): 658-664.
- 23  
24  
25 449 33. Jin Z, Hu J, Ma D. Postoperative delirium: perioperative assessment, risk  
26  
27 450 reduction, and management. *Br J Anaesth*. 2020;125(4): 492-504.
- 28  
29  
30 451 34. Li Y, Lu Q, Wang B, et al. Preoperative Fasting Times for Patients Undergoing  
31  
32 452 Elective Surgery at a Pediatric Hospital in Shanghai: The Big  
33  
34  
35 453 Evidence-Practice Gap. *J Perianesth Nurs*. 2021;36(5):559-563
- 36  
37  
38 454 35. Yan LM, Chen H, Yu RG, et al. Emergence agitation during recovery from  
39  
40 455 intracranial surgery under general anaesthesia: a protocol and statistical  
41  
42 456 analysis plan for a prospective multicentre cohort study. *BMJ Open*.  
43  
44  
45 457 2015;21;5(4):e007542

463 **Tables**464 **Table 1 Richmond agitation sedation scale**

| Score | Term              | Description                                                                                  |
|-------|-------------------|----------------------------------------------------------------------------------------------|
| +4    | Combative         | Overtly combative, violent, immediate danger to staff                                        |
| +3    | Very agitated     | Pulls or removes tube(s) or catheter(s); aggressive                                          |
| +2    | Agitated          | Frequent non-purposeful movement; fights ventilator                                          |
| +1    | Restless          | Anxious but movements not aggressive or vigorous                                             |
| 0     | Alert and calm    |                                                                                              |
| -1    | Drowsy            | Not fully alert but has sustained awakening (eye-opening/eye contact) to voice (>10 seconds) |
| -2    | Light sedation    | Briefly awake with eye contact to voice (<10 seconds)                                        |
| -3    | Moderate sedation | Movement or eye opening to voice (but no eye contact)                                        |
| -4    | Deep sedation     | No response to voice, but movement or eye opening to physical stimulation                    |
| -5    | Unarousable       | No response to voice or physical stimulation                                                 |

465

466 **Notes:** Scores of 1 to 4 indicated different levels of agitation, 0 indicated calmness

467 and alertness, and -1 to -5 indicated different levels of sedation.

468

469

470

471 **Table 2 Population data and medical history**

| <b>Variables</b>                     | <b>Agitation Groups<br/>(n=154)</b> | <b>Non-agitation Groups<br/>(n=256)</b> | <b>P-value</b> |
|--------------------------------------|-------------------------------------|-----------------------------------------|----------------|
| <b>Age</b>                           | 69. 84±6. 53                        | 69. 39±6. 82                            | 0. 238         |
| <b>Male (n, %)</b>                   | 91 (59. 1%)                         | 71 (27. 7%)                             | <0. 001***     |
| <b>BMI (Kg. m<sup>-2</sup>)</b>      | 22. 75±4. 31                        | 23. 17±2. 56                            | 0. 253         |
| <b>ASA classification<br/>(n, %)</b> |                                     |                                         | 0. 221         |
| <b>I</b>                             | 0                                   | 0                                       |                |
| <b>II</b>                            | 118 (76. 6%)                        | 182 (71. 1%)                            |                |
| <b>III</b>                           | 36 (23. 4%)                         | 74 (28. 9%)                             |                |
| <b>Education (n, %)</b>              |                                     |                                         | 0. 412         |
| Illiteracy                           | 42 (27. 3%)                         | 55 (21. 5%)                             |                |
| Primary school                       | 45 (29. 2%)                         | 93 (36. 3%)                             |                |
| Secondary school                     | 59 (38. 3%)                         | 96 (37. 5%)                             |                |
| University and above                 | 8 (5. 2%)                           | 12 (4. 7%)                              |                |
| <b>Medical history<br/>(n, %)</b>    |                                     |                                         |                |
| <b>Heart disease</b>                 |                                     |                                         | 0. 816         |
| <b>Yes</b>                           | 72 (46. 8%)                         | 113 (44. 1%)                            |                |
| <b>No</b>                            | 82 (53. 2%)                         | 143 (55. 9%)                            |                |

| Variables            | Agitation Groups<br>(n=154) | Non-agitation Groups<br>(n=256) | P-value |
|----------------------|-----------------------------|---------------------------------|---------|
| Respiratory diseases |                             |                                 | 0.760   |
| Yes                  | 80 (51.9%)                  | 129 (50.4%)                     |         |
| No                   | 74 (48.1%)                  | 127 (49.6%)                     |         |
| Hypertension         |                             |                                 | 0.981   |
| Yes                  | 78 (50.6%)                  | 131 (51.2%)                     |         |
| No                   | 76 (49.4%)                  | 125 (48.8%)                     |         |
| Diabetes             |                             |                                 |         |
| Yes                  | 71 (46.1%)                  | 119 (46.5%)                     | 0.940   |
| No                   | 83 (53.9%)                  | 137 (53.5%)                     |         |

472 **Notes:** Clinical information of patients were analysed using univariate analysis.

473 Continuous data are presented as the means  $\pm$  standard deviations, while categorical

474 data are presented as numbers and percentages. \*P-value, differences between

475 patients in the two groups. \*P<0.05, \*\*\*P<0.001. ASA: American Society of

476 Anesthesiologists; BMI: body mass index.

477

478

479

480

481

482

483 **Table 3 Patients' perioperative clinical information and agitation-related**  
 484 **laboratory test indicators**

| <b>Variables</b>                                       | <b>Agitation<br/>Groups<br/>(n=154)</b> | <b>Non-agitation<br/>Groups<br/>(n=256)</b> | <b>P-value</b> |
|--------------------------------------------------------|-----------------------------------------|---------------------------------------------|----------------|
| <b>Operation type (n, %)</b>                           |                                         |                                             | 0.524          |
| TKA                                                    | 85 (55.2%)                              | 133 (52.0%)                                 |                |
| THA                                                    | 69 (44.8%)                              | 123 (48.0%)                                 |                |
| <b>Operation times in TKA (min)</b>                    | 144.42±59.96                            | 143.91±46.19                                | 0.236          |
| <b>Operation times in THA (min)</b>                    | 139.96±64.60                            | 128.48±58.98                                | 0.213          |
| <b>VAS score for postoperative pain</b>                | 3.50±2.13                               | 1.67±1.02                                   | <0.001***      |
| <b>Body temperature at the end of the surgery (°C)</b> | 35.87±0.73                              | 36.03±0.94                                  | 0.037*         |
| <b>CRBD (n, %)</b>                                     |                                         |                                             | <0.001***      |
| Yes                                                    | 119(77.3%)                              | 83 (32.4%)                                  |                |
| No                                                     | 35(22.7%)                               | 173(67.6%)                                  |                |
| <b>Preoperative fasting times (h)</b>                  |                                         |                                             |                |
| fasting times for solids                               | 10.19±1.05                              | 8.76±0.88                                   | <0.001***      |
| fasting times for fluids                               | 4.81±1.14                               | 2.99±0.92                                   | <0.001***      |
| <b>Intraoperative blood loss (ml)</b>                  | 217.26±30.18                            | 200.32±27.48                                | 0.224          |



1  
2  
3  
4  
5  
6  
7  
8  
9  
10  
11  
12  
13  
14  
15  
16  
17  
18  
19  
20  
21  
22  
23  
24  
25  
26  
27  
28  
29  
30  
31  
32  
33  
34  
35  
36  
37  
38  
39  
40  
41  
42  
43  
44  
45  
46  
47  
48  
49  
50  
51  
52  
53  
54  
55  
56  
57  
58  
59  
60

485

| <b>Variables</b>                                    | <b>Agitation Groups<br/>(n=154)</b> | <b>Non-agitation Groups<br/>(n=256)</b> | <b>P-value</b> |
|-----------------------------------------------------|-------------------------------------|-----------------------------------------|----------------|
| <b>Severe Intraoperative hypotension<br/>(n, %)</b> |                                     |                                         | 0.261          |
| Yes                                                 | 14 (9.1%)                           | 15 (5.9%)                               |                |
| No                                                  | 140 (90.9%)                         | 241 (94.1%)                             |                |
| <b>Postoperative nausea and vomiting<br/>(n, %)</b> |                                     |                                         | 0.332          |
| Yes                                                 | 67 (43.5%)                          | 124 (48.4%)                             |                |
| No                                                  | 87 (56.5%)                          | 132 (51.6%)                             |                |
| <b>The duration in PACU (min)</b>                   | 32.83±14.07                         | 31.00±8.57                              | 0.025*         |
| <b>Warm treatment (n, %)</b>                        |                                     |                                         | 0.880          |
| Yes                                                 | 68 (44.2%)                          | 115 (44.9%)                             |                |
| No                                                  | 86 (55.8%)                          | 141 (55.1%)                             |                |
| <b>Laboratory testing</b>                           |                                     |                                         |                |
| HCO <sub>3</sub> <sup>-</sup> (mmol/L)              | 22.3±1.86                           | 24.7±1.33                               | 0.291          |
| PaCO <sub>2</sub> (mmHg)                            | 38.61±1.42                          | 39.44±1.58                              | 0.318          |
| PaO <sub>2</sub> (mmHg)                             | 89.52±1.74                          | 90.17±1.55                              | 0.282          |
| pH                                                  | 7.447±0.32                          | 7.426±0.41                              | 0.263          |
| Hb levels (g/L)                                     | 16.6±1.93                           | 17.1±1.85                               | 0.274          |

1  
2  
3  
4 486 **Notes:** Patients' perioperative clinical information and agitation-related laboratory  
5  
6 487 test indicators were analysed using univariate analysis. Continuous data are presented  
7  
8  
9 488 as means  $\pm$  standard deviations, while categorical data are presented as numbers and  
10  
11 489 percentages. \*P-value, differences between patients in the two groups. \*P<0. 05,  
12  
13  
14 490 \*\*\*P<0. 001.  
15  
16  
17 491  
18  
19 492  
20  
21 493  
22  
23 494  
24  
25 495  
26  
27 496  
28  
29 497  
30  
31 498  
32  
33 499  
34  
35 500  
36  
37 501  
38  
39 502  
40  
41 503  
42  
43 504  
44  
45 505  
46  
47 506  
48  
49 507  
50  
51  
52  
53  
54  
55  
56  
57  
58  
59  
60

1  
2  
3  
4 5085  
6  
7 509 **Figure legends**8  
9 510 **Figure 1 Flow chart of study participants.** In total, 421 patients met the inclusion  
10  
11 511 and exclusion criteria. However, 11 patients were excluded from the study; six were  
12  
13  
14 512 transferred to the ICU postoperatively, and the surgical protocols of five were  
15  
16  
17 513 changed during the operation. Finally, the statistical analysis included 410 patients.  
18

19 514

20  
21  
22 515 **Figure 2 Risk factors for EA using metanalysis plot.** The VAS score for  
23  
24  
25 516 postoperative pain (OR = 2.497; 95% CI: 1.951–3.196), male sex (OR = 3.391; 95%  
26  
27 517 CI: 1.781–6.435), urinary catheter irritation (OR = 7.847; 95% CI: 4.001–15.392),  
28  
29  
30 518 fasting times for solids (OR = 1.703; 95% CI: 1.260–2.301), and fasting times for  
31  
32  
33 519 fluids (OR = 1.728; 95% CI: 1.263–2.365) were the independent risk factors.  
34

35 520

36  
37  
38 521 **Figure 3 Risk factors for EA using the ROC curve.** Predictive values of risk factors  
39  
40 522 were assessed using the ROC curve. The VAS score for postoperative pain (AUC =  
41  
42  
43 523 0.769, 95% CI: 0.718–0.819,  $P < 0.001$ ), fasting times for solids (AUC = 0.753, 95%  
44  
45 524 CI: 0.699–0.807,  $P < 0.001$ ) and fasting times for fluids (AUC = 0.768, 95% CI:  
46  
47  
48 525 0.719–0.816,  $P < 0.001$ ) demonstrated good predictive effects.  
49

50 526

51  
52  
53 52754  
55  
56 52857  
58  
59 529

1  
2  
3  
4 5305  
6  
7  
8 531 **Reporting checklist for cross sectional study.**9  
10 532 Based on the STROBE cross sectional guidelines.11  
12  
13 533 **Instructions to authors**14  
15  
16  
17 534 Complete this checklist by entering the page numbers from your manuscript  
18 535 where readers will find each of the items listed below.19  
20  
21 536 Your article may not currently address all the items on the checklist. Please  
22 537 modify your text to include the missing information. If you are certain that an  
23 538 item does not apply, please write "n/a" and provide a short explanation.24  
25  
26  
27 539 Upload your completed checklist as an extra file when you submit to a journal.28  
29  
30 540 In your methods section, say that you used the STROBE cross  
31 541 sectionalreporting guidelines, and cite them as:32  
33  
34  
35 542 von Elm E, Altman DG, Egger M, Pocock SJ, Gotsche PC, Vandembroucke  
36 543 JP. The Strengthening the Reporting of Observational Studies in Epidemiology  
37 544 (STROBE) Statement: guidelines for reporting observational studies.

|  |          | Reporting Item                                                                         | Page Number |
|--|----------|----------------------------------------------------------------------------------------|-------------|
|  |          | Title and abstract                                                                     |             |
|  | Title    | #1a Indicate the study's design with a commonly used term in the title or the abstract | 1           |
|  | Abstract | #1b Provide in the abstract an informative and balanced summary of what was done and   | 3           |

what was found

**Introduction**

|    |                      |     |                                                |    |
|----|----------------------|-----|------------------------------------------------|----|
| 8  | Background /         | #2  | Explain the scientific background and          | 5  |
| 9  | rationale            |     | rationale for the investigation being          |    |
| 10 |                      |     | reported                                       |    |
| 11 |                      |     |                                                |    |
| 12 |                      |     |                                                |    |
| 13 |                      |     |                                                |    |
| 14 | Objectives           | #3  | State specific objectives, including any       | 6  |
| 15 |                      |     | prespecified hypotheses                        |    |
| 16 |                      |     |                                                |    |
| 17 |                      |     |                                                |    |
| 18 | Methods              |     |                                                |    |
| 19 |                      |     |                                                |    |
| 20 |                      |     |                                                |    |
| 21 | Study design         | #4  | Present key elements of study design           | NA |
| 22 |                      |     | early in the paper                             |    |
| 23 |                      |     |                                                |    |
| 24 |                      |     |                                                |    |
| 25 | Setting              | #5  | Describe the setting, locations, and           | 7  |
| 26 |                      |     | relevant dates, including periods of           |    |
| 27 |                      |     | recruitment, exposure, follow-up, and          |    |
| 28 |                      |     | data collection                                |    |
| 29 |                      |     |                                                |    |
| 30 |                      |     |                                                |    |
| 31 |                      |     |                                                |    |
| 32 |                      |     |                                                |    |
| 33 | Eligibility criteria | #6a | Give the eligibility criteria, and the         | 7  |
| 34 |                      |     | sources and methods of selection of            |    |
| 35 |                      |     | participants.                                  |    |
| 36 |                      |     |                                                |    |
| 37 |                      |     |                                                |    |
| 38 |                      |     |                                                |    |
| 39 |                      | #7  | Clearly define all outcomes, exposures,        | 8  |
| 40 |                      |     | predictors, potential confounders, and         |    |
| 41 |                      |     | effect modifiers. Give diagnostic criteria, if |    |
| 42 |                      |     | applicable                                     |    |
| 43 |                      |     |                                                |    |
| 44 |                      |     |                                                |    |
| 45 |                      |     |                                                |    |
| 46 | Data sources /       | #8  | For each variable of interest give sources     | 8  |
| 47 | measurement          |     | of data and details of methods of              |    |
| 48 |                      |     | assessment (measurement). Describe             |    |
| 49 |                      |     | comparability of assessment methods if         |    |
| 50 |                      |     | there is more than one group. Give             |    |
| 51 |                      |     | information separately for for exposed         |    |
| 52 |                      |     | and unexposed groups if applicable.            |    |
| 53 |                      |     |                                                |    |
| 54 |                      |     |                                                |    |
| 55 |                      |     |                                                |    |
| 56 |                      |     |                                                |    |
| 57 |                      |     |                                                |    |
| 58 |                      |     |                                                |    |
| 59 |                      |     |                                                |    |
| 60 |                      |     |                                                |    |

|    |                        |      |                                                                                                                                                                                                                                                                                |      |
|----|------------------------|------|--------------------------------------------------------------------------------------------------------------------------------------------------------------------------------------------------------------------------------------------------------------------------------|------|
| 1  |                        |      |                                                                                                                                                                                                                                                                                |      |
| 2  |                        |      |                                                                                                                                                                                                                                                                                |      |
| 3  |                        |      |                                                                                                                                                                                                                                                                                |      |
| 4  | Bias                   | #9   | Describe any efforts to address potential sources of bias                                                                                                                                                                                                                      | 8-9  |
| 5  |                        |      |                                                                                                                                                                                                                                                                                |      |
| 6  |                        |      |                                                                                                                                                                                                                                                                                |      |
| 7  |                        |      |                                                                                                                                                                                                                                                                                |      |
| 8  | Study size             | #10  | Explain how the study size was arrived at                                                                                                                                                                                                                                      | 9    |
| 9  |                        |      |                                                                                                                                                                                                                                                                                |      |
| 10 |                        |      |                                                                                                                                                                                                                                                                                |      |
| 11 | Quantitative variables | #11  | Explain how quantitative variables were handled in the analyses. If applicable, describe which groupings were chosen, and why                                                                                                                                                  | 8    |
| 12 |                        |      |                                                                                                                                                                                                                                                                                |      |
| 13 |                        |      |                                                                                                                                                                                                                                                                                |      |
| 14 |                        |      |                                                                                                                                                                                                                                                                                |      |
| 15 |                        |      |                                                                                                                                                                                                                                                                                |      |
| 16 |                        |      |                                                                                                                                                                                                                                                                                |      |
| 17 |                        |      |                                                                                                                                                                                                                                                                                |      |
| 18 | Statistical methods    | #12a | Describe all statistical methods, including those used to control for confounding                                                                                                                                                                                              | 9-10 |
| 19 |                        |      |                                                                                                                                                                                                                                                                                |      |
| 20 |                        |      |                                                                                                                                                                                                                                                                                |      |
| 21 |                        |      |                                                                                                                                                                                                                                                                                |      |
| 22 | Statistical methods    | #12b | Describe any methods used to examine subgroups and interactions                                                                                                                                                                                                                | 9-10 |
| 23 |                        |      |                                                                                                                                                                                                                                                                                |      |
| 24 |                        |      |                                                                                                                                                                                                                                                                                |      |
| 25 |                        |      |                                                                                                                                                                                                                                                                                |      |
| 26 |                        |      |                                                                                                                                                                                                                                                                                |      |
| 27 | Statistical methods    | #12c | Explain how missing data were addressed                                                                                                                                                                                                                                        | NA   |
| 28 |                        |      |                                                                                                                                                                                                                                                                                |      |
| 29 |                        |      |                                                                                                                                                                                                                                                                                |      |
| 30 |                        |      |                                                                                                                                                                                                                                                                                |      |
| 31 | Statistical methods    | #12d | If applicable, describe analytical methods taking account of sampling strategy                                                                                                                                                                                                 | NA   |
| 32 |                        |      |                                                                                                                                                                                                                                                                                |      |
| 33 |                        |      |                                                                                                                                                                                                                                                                                |      |
| 34 |                        |      |                                                                                                                                                                                                                                                                                |      |
| 35 | Statistical methods    | #12e | Describe any sensitivity analyses                                                                                                                                                                                                                                              | 9-10 |
| 36 |                        |      |                                                                                                                                                                                                                                                                                |      |
| 37 |                        |      |                                                                                                                                                                                                                                                                                |      |
| 38 |                        |      |                                                                                                                                                                                                                                                                                |      |
| 39 | Results                |      |                                                                                                                                                                                                                                                                                |      |
| 40 |                        |      |                                                                                                                                                                                                                                                                                |      |
| 41 |                        |      |                                                                                                                                                                                                                                                                                |      |
| 42 | Participants           | #13a | Report numbers of individuals at each stage of study—eg numbers potentially eligible, examined for eligibility, confirmed eligible, included in the study, completing follow-up, and analysed. Give information separately for for exposed and unexposed groups if applicable. | 11   |
| 43 |                        |      |                                                                                                                                                                                                                                                                                |      |
| 44 |                        |      |                                                                                                                                                                                                                                                                                |      |
| 45 |                        |      |                                                                                                                                                                                                                                                                                |      |
| 46 |                        |      |                                                                                                                                                                                                                                                                                |      |
| 47 |                        |      |                                                                                                                                                                                                                                                                                |      |
| 48 |                        |      |                                                                                                                                                                                                                                                                                |      |
| 49 |                        |      |                                                                                                                                                                                                                                                                                |      |
| 50 |                        |      |                                                                                                                                                                                                                                                                                |      |
| 51 |                        |      |                                                                                                                                                                                                                                                                                |      |
| 52 |                        |      |                                                                                                                                                                                                                                                                                |      |
| 53 |                        |      |                                                                                                                                                                                                                                                                                |      |
| 54 | Participants           | #13b | Give reasons for non-participation at each stage                                                                                                                                                                                                                               | 11   |
| 55 |                        |      |                                                                                                                                                                                                                                                                                |      |
| 56 |                        |      |                                                                                                                                                                                                                                                                                |      |
| 57 |                        |      |                                                                                                                                                                                                                                                                                |      |
| 58 |                        |      |                                                                                                                                                                                                                                                                                |      |
| 59 |                        |      |                                                                                                                                                                                                                                                                                |      |
| 60 |                        |      |                                                                                                                                                                                                                                                                                |      |

|    |                  |                                                  |       |
|----|------------------|--------------------------------------------------|-------|
| 1  |                  |                                                  |       |
| 2  |                  |                                                  |       |
| 3  |                  |                                                  |       |
| 4  | Participants     | #13c Consider use of a flow diagram              | 32    |
| 5  |                  |                                                  |       |
| 6  |                  |                                                  |       |
| 7  | Descriptive data | #14a Give characteristics of study participants  | 11    |
| 8  |                  | (eg demographic, clinical, social) and           |       |
| 9  |                  | information on exposures and potential           |       |
| 10 |                  | confounders. Give information separately         |       |
| 11 |                  | for exposed and unexposed groups if              |       |
| 12 |                  | applicable.                                      |       |
| 13 |                  |                                                  |       |
| 14 |                  |                                                  |       |
| 15 |                  |                                                  |       |
| 16 |                  |                                                  |       |
| 17 | Descriptive data | #14b Indicate number of participants with        | 11    |
| 18 |                  | missing data for each variable of interest       |       |
| 19 |                  |                                                  |       |
| 20 |                  |                                                  |       |
| 21 |                  |                                                  |       |
| 22 | Outcome data     | #15 Report numbers of outcome events or          | 11-13 |
| 23 |                  | summary measures. Give information               |       |
| 24 |                  | separately for exposed and unexposed             |       |
| 25 |                  | groups if applicable.                            |       |
| 26 |                  |                                                  |       |
| 27 |                  |                                                  |       |
| 28 |                  |                                                  |       |
| 29 | Main results     | #16a Give unadjusted estimates and, if           | 12    |
| 30 |                  | applicable, confounder-adjusted                  |       |
| 31 |                  | estimates and their precision (eg, 95%           |       |
| 32 |                  | confidence interval). Make clear which           |       |
| 33 |                  | confounders were adjusted for and why            |       |
| 34 |                  | they were included                               |       |
| 35 |                  |                                                  |       |
| 36 |                  |                                                  |       |
| 37 |                  |                                                  |       |
| 38 |                  |                                                  |       |
| 39 |                  |                                                  |       |
| 40 | Main results     | #16b Report category boundaries when             | NA    |
| 41 |                  | continuous variables were categorized            |       |
| 42 |                  |                                                  |       |
| 43 |                  |                                                  |       |
| 44 | Main results     | #16c If relevant, consider translating estimates | NA    |
| 45 |                  | of relative risk into absolute risk for a        |       |
| 46 |                  | meaningful time period                           |       |
| 47 |                  |                                                  |       |
| 48 |                  |                                                  |       |
| 49 |                  |                                                  |       |
| 50 | Other analyses   | #17 Report other analyses done—e.g.,             | NA    |
| 51 |                  | analyses of subgroups and interactions,          |       |
| 52 |                  | and sensitivity analyses                         |       |
| 53 |                  |                                                  |       |
| 54 |                  |                                                  |       |
| 55 |                  |                                                  |       |
| 56 | Discussion       |                                                  |       |
| 57 |                  |                                                  |       |
| 58 |                  |                                                  |       |
| 59 |                  |                                                  |       |
| 60 |                  |                                                  |       |

|    |                  |                                                                                                                       |                                                                     |       |
|----|------------------|-----------------------------------------------------------------------------------------------------------------------|---------------------------------------------------------------------|-------|
| 1  |                  |                                                                                                                       |                                                                     |       |
| 2  |                  |                                                                                                                       |                                                                     |       |
| 3  |                  |                                                                                                                       |                                                                     |       |
| 4  | Key results      | #18                                                                                                                   | Summarise key results with reference to                             | 13    |
| 5  |                  |                                                                                                                       | study objectives                                                    |       |
| 6  |                  |                                                                                                                       |                                                                     |       |
| 7  |                  |                                                                                                                       |                                                                     |       |
| 8  | Limitations      | #19                                                                                                                   | Discuss limitations of the study, taking                            | 17    |
| 9  |                  |                                                                                                                       | into account sources of potential bias or                           |       |
| 10 |                  |                                                                                                                       | imprecision. Discuss both direction and                             |       |
| 11 |                  |                                                                                                                       | magnitude of any potential bias.                                    |       |
| 12 |                  |                                                                                                                       |                                                                     |       |
| 13 |                  |                                                                                                                       |                                                                     |       |
| 14 |                  |                                                                                                                       |                                                                     |       |
| 15 |                  |                                                                                                                       |                                                                     |       |
| 16 | Interpretation   | #20                                                                                                                   | Give a cautious overall interpretation                              | 13-17 |
| 17 |                  |                                                                                                                       | considering objectives, limitations,                                |       |
| 18 |                  |                                                                                                                       | multiplicity of analyses, results from                              |       |
| 19 |                  |                                                                                                                       | similar studies, and other relevant                                 |       |
| 20 |                  |                                                                                                                       | evidence.                                                           |       |
| 21 |                  |                                                                                                                       |                                                                     |       |
| 22 |                  |                                                                                                                       |                                                                     |       |
| 23 |                  |                                                                                                                       |                                                                     |       |
| 24 |                  |                                                                                                                       |                                                                     |       |
| 25 | Generalisability | #21                                                                                                                   | Discuss the generalisability (external                              | 17    |
| 26 |                  |                                                                                                                       | validity) of the study results                                      |       |
| 27 |                  |                                                                                                                       |                                                                     |       |
| 28 |                  |                                                                                                                       |                                                                     |       |
| 29 | Other            |                                                                                                                       |                                                                     |       |
| 30 | Information      |                                                                                                                       |                                                                     |       |
| 31 |                  |                                                                                                                       |                                                                     |       |
| 32 |                  |                                                                                                                       |                                                                     |       |
| 33 |                  |                                                                                                                       |                                                                     |       |
| 34 | Funding          | #22                                                                                                                   | Give the source of funding and the role of                          | 17    |
| 35 |                  |                                                                                                                       | the funders for the present study and, if                           |       |
| 36 |                  |                                                                                                                       | applicable, for the original study on which                         |       |
| 37 |                  |                                                                                                                       | the present article is based                                        |       |
| 38 |                  |                                                                                                                       |                                                                     |       |
| 39 |                  |                                                                                                                       |                                                                     |       |
| 40 |                  |                                                                                                                       |                                                                     |       |
| 41 | 545              | None                                                                                                                  | The STROBE checklist is distributed under the terms of the Creative |       |
| 42 | 546              | Commons Attribution License CC-BY. This checklist can be completed online                                             |                                                                     |       |
| 43 | 547              | using <a href="https://www.goodreports.org/">https://www.goodreports.org/</a> , a tool made by the EQUATOR Network in |                                                                     |       |
| 44 | 548              | collaboration with Penelope.ai                                                                                        |                                                                     |       |
| 45 |                  |                                                                                                                       |                                                                     |       |
| 46 |                  |                                                                                                                       |                                                                     |       |
| 47 |                  |                                                                                                                       |                                                                     |       |
| 48 |                  |                                                                                                                       |                                                                     |       |
| 49 | 549              |                                                                                                                       |                                                                     |       |
| 50 |                  |                                                                                                                       |                                                                     |       |
| 51 |                  |                                                                                                                       |                                                                     |       |
| 52 |                  |                                                                                                                       |                                                                     |       |
| 53 |                  |                                                                                                                       |                                                                     |       |
| 54 |                  |                                                                                                                       |                                                                     |       |
| 55 |                  |                                                                                                                       |                                                                     |       |
| 56 |                  |                                                                                                                       |                                                                     |       |
| 57 |                  |                                                                                                                       |                                                                     |       |
| 58 |                  |                                                                                                                       |                                                                     |       |
| 59 |                  |                                                                                                                       |                                                                     |       |
| 60 |                  |                                                                                                                       |                                                                     |       |



1  
2  
3  
4  
5  
6  
7  
8  
9  
10  
11  
12  
13  
14  
15  
16  
17  
18  
19  
20  
21  
22  
23  
24  
25  
26  
27  
28  
29  
30  
31  
32  
33  
34  
35  
36  
37  
38  
39  
40  
41  
42  
43  
44  
45  
46  
47  
48  
49  
50  
51  
52  
53  
54  
55  
56  
57  
58  
59  
60

Figure 1 Flow chart of study participants.



Figure 1 Flow chart of study participants

419x390mm (144 x 144 DPI)



Figure 2 Risk factors of EA by metanalysis plot

436x179mm (57 x 57 DPI)

1  
2  
3  
4  
5  
6  
7  
8  
9  
10  
11  
12  
13  
14  
15  
16  
17  
18  
19  
20  
21  
22  
23  
24  
25  
26  
27  
28  
29  
30  
31  
32  
33  
34  
35  
36  
37  
38  
39  
40  
41  
42  
43  
44  
45  
46  
47  
48  
49  
50  
51  
52  
53  
54  
55  
56  
57  
58  
59  
60



Figure 3 Risk factors of EA by the ROC curve  
1178x667mm (57 x 57 DPI)

## Reporting checklist for cross sectional study.

Based on the STROBE cross sectional guidelines.

### Instructions to authors

Complete this checklist by entering the page numbers from your manuscript where readers will find each of the items listed below.

Your article may not currently address all the items on the checklist. Please modify your text to include the missing information. If you are certain that an item does not apply, please write "n/a" and provide a short explanation.

Upload your completed checklist as an extra file when you submit to a journal.

In your methods section, say that you used the STROBE cross sectional reporting guidelines, and cite them as:

von Elm E, Altman DG, Egger M, Pocock SJ, Gøtzsche PC, Vandenbroucke JP. The Strengthening the Reporting of Observational Studies in Epidemiology (STROBE) Statement: guidelines for reporting observational studies.

|  |          | Reporting Item                                                                         | Page Number |
|--|----------|----------------------------------------------------------------------------------------|-------------|
|  |          | Title and abstract                                                                     |             |
|  | Title    | #1a Indicate the study's design with a commonly used term in the title or the abstract | 1           |
|  | Abstract | #1b Provide in the abstract an informative and balanced summary of what was done and   | 3           |

what was found

**Introduction**

|    |                      |     |                                                |     |
|----|----------------------|-----|------------------------------------------------|-----|
| 8  | Background /         | #2  | Explain the scientific background and          | 5   |
| 9  | rationale            |     | rationale for the investigation being          |     |
| 10 |                      |     | reported                                       |     |
| 11 |                      |     |                                                |     |
| 12 |                      |     |                                                |     |
| 13 |                      |     |                                                |     |
| 14 | Objectives           | #3  | State specific objectives, including any       | 6   |
| 15 |                      |     | prespecified hypotheses                        |     |
| 16 |                      |     |                                                |     |
| 17 |                      |     |                                                |     |
| 18 | Methods              |     |                                                |     |
| 19 |                      |     |                                                |     |
| 20 |                      |     |                                                |     |
| 21 | Study design         | #4  | Present key elements of study design           | NA  |
| 22 |                      |     | early in the paper                             |     |
| 23 |                      |     |                                                |     |
| 24 |                      |     |                                                |     |
| 25 | Setting              | #5  | Describe the setting, locations, and           | 7   |
| 26 |                      |     | relevant dates, including periods of           |     |
| 27 |                      |     | recruitment, exposure, follow-up, and          |     |
| 28 |                      |     | data collection                                |     |
| 29 |                      |     |                                                |     |
| 30 |                      |     |                                                |     |
| 31 |                      |     |                                                |     |
| 32 |                      |     |                                                |     |
| 33 | Eligibility criteria | #6a | Give the eligibility criteria, and the         | 7   |
| 34 |                      |     | sources and methods of selection of            |     |
| 35 |                      |     | participants.                                  |     |
| 36 |                      |     |                                                |     |
| 37 |                      |     |                                                |     |
| 38 |                      |     |                                                |     |
| 39 |                      | #7  | Clearly define all outcomes, exposures,        | 8   |
| 40 |                      |     | predictors, potential confounders, and         |     |
| 41 |                      |     | effect modifiers. Give diagnostic criteria, if |     |
| 42 |                      |     | applicable                                     |     |
| 43 |                      |     |                                                |     |
| 44 |                      |     |                                                |     |
| 45 |                      |     |                                                |     |
| 46 | Data sources /       | #8  | For each variable of interest give sources     | 8   |
| 47 | measurement          |     | of data and details of methods of              |     |
| 48 |                      |     | assessment (measurement). Describe             |     |
| 49 |                      |     | comparability of assessment methods if         |     |
| 50 |                      |     | there is more than one group. Give             |     |
| 51 |                      |     | information separately for for exposed         |     |
| 52 |                      |     | and unexposed groups if applicable.            |     |
| 53 |                      |     |                                                |     |
| 54 |                      |     |                                                |     |
| 55 |                      |     |                                                |     |
| 56 |                      |     |                                                |     |
| 57 |                      |     |                                                |     |
| 58 |                      |     |                                                |     |
| 59 | Bias                 | #9  | Describe any efforts to address potential      | 8-9 |
| 60 |                      |     |                                                |     |

|    |                  |      |                                               |      |
|----|------------------|------|-----------------------------------------------|------|
|    |                  |      | sources of bias                               |      |
| 1  |                  |      |                                               |      |
| 2  |                  |      |                                               |      |
| 3  |                  |      |                                               |      |
| 4  |                  |      |                                               |      |
| 5  |                  |      |                                               |      |
| 6  | Study size       | #10  | Explain how the study size was arrived at     | 9    |
| 7  |                  |      |                                               |      |
| 8  | Quantitative     | #11  | Explain how quantitative variables were       | 8    |
| 9  | variables        |      | handled in the analyses. If applicable,       |      |
| 10 |                  |      | describe which groupings were chosen,         |      |
| 11 |                  |      | and why                                       |      |
| 12 |                  |      |                                               |      |
| 13 |                  |      |                                               |      |
| 14 |                  |      |                                               |      |
| 15 |                  |      |                                               |      |
| 16 | Statistical      | #12a | Describe all statistical methods, including   | 9-10 |
| 17 | methods          |      | those used to control for confounding         |      |
| 18 |                  |      |                                               |      |
| 19 |                  |      |                                               |      |
| 20 | Statistical      | #12b | Describe any methods used to examine          | 9-10 |
| 21 | methods          |      | subgroups and interactions                    |      |
| 22 |                  |      |                                               |      |
| 23 |                  |      |                                               |      |
| 24 | Statistical      | #12c | Explain how missing data were                 | NA   |
| 25 | methods          |      | addressed                                     |      |
| 26 |                  |      |                                               |      |
| 27 |                  |      |                                               |      |
| 28 | Statistical      | #12d | If applicable, describe analytical methods    | NA   |
| 29 | methods          |      | taking account of sampling strategy           |      |
| 30 |                  |      |                                               |      |
| 31 |                  |      |                                               |      |
| 32 |                  |      |                                               |      |
| 33 | Statistical      | #12e | Describe any sensitivity analyses             | 9-10 |
| 34 | methods          |      |                                               |      |
| 35 |                  |      |                                               |      |
| 36 |                  |      |                                               |      |
| 37 | Results          |      |                                               |      |
| 38 |                  |      |                                               |      |
| 39 |                  |      |                                               |      |
| 40 | Participants     | #13a | Report numbers of individuals at each         | 11   |
| 41 |                  |      | stage of study—eg numbers potentially         |      |
| 42 |                  |      | eligible, examined for eligibility, confirmed |      |
| 43 |                  |      | eligible, included in the study, completing   |      |
| 44 |                  |      | follow-up, and analysed. Give information     |      |
| 45 |                  |      | separately for for exposed and                |      |
| 46 |                  |      | unexposed groups if applicable.               |      |
| 47 |                  |      |                                               |      |
| 48 |                  |      |                                               |      |
| 49 |                  |      |                                               |      |
| 50 |                  |      |                                               |      |
| 51 |                  |      |                                               |      |
| 52 | Participants     | #13b | Give reasons for non-participation at         | 11   |
| 53 |                  |      | each stage                                    |      |
| 54 |                  |      |                                               |      |
| 55 |                  |      |                                               |      |
| 56 | Participants     | #13c | Consider use of a flow diagram                | 32   |
| 57 |                  |      |                                               |      |
| 58 |                  |      |                                               |      |
| 59 | Descriptive data | #14a | Give characteristics of study participants    | 11   |
| 60 |                  |      |                                               |      |

(eg demographic, clinical, social) and information on exposures and potential confounders. Give information separately for exposed and unexposed groups if applicable.

|    |                  |                                                  |       |
|----|------------------|--------------------------------------------------|-------|
| 1  |                  |                                                  |       |
| 2  |                  |                                                  |       |
| 3  |                  |                                                  |       |
| 4  |                  | (eg demographic, clinical, social) and           |       |
| 5  |                  | information on exposures and potential           |       |
| 6  |                  | confounders. Give information separately         |       |
| 7  |                  | for exposed and unexposed groups if              |       |
| 8  |                  | applicable.                                      |       |
| 9  |                  |                                                  |       |
| 10 |                  |                                                  |       |
| 11 |                  |                                                  |       |
| 12 |                  |                                                  |       |
| 13 | Descriptive data | #14b Indicate number of participants with        | 11    |
| 14 |                  | missing data for each variable of interest       |       |
| 15 |                  |                                                  |       |
| 16 |                  |                                                  |       |
| 17 | Outcome data     | #15 Report numbers of outcome events or          | 11-13 |
| 18 |                  | summary measures. Give information               |       |
| 19 |                  | separately for exposed and unexposed             |       |
| 20 |                  | groups if applicable.                            |       |
| 21 |                  |                                                  |       |
| 22 |                  |                                                  |       |
| 23 |                  |                                                  |       |
| 24 | Main results     | #16a Give unadjusted estimates and, if           | 12    |
| 25 |                  | applicable, confounder-adjusted                  |       |
| 26 |                  | estimates and their precision (eg, 95%           |       |
| 27 |                  | confidence interval). Make clear which           |       |
| 28 |                  | confounders were adjusted for and why            |       |
| 29 |                  | they were included.                              |       |
| 30 |                  |                                                  |       |
| 31 |                  |                                                  |       |
| 32 |                  |                                                  |       |
| 33 |                  |                                                  |       |
| 34 |                  |                                                  |       |
| 35 | Main results     | #16b Report category boundaries when             | NA    |
| 36 |                  | continuous variables were categorized            |       |
| 37 |                  |                                                  |       |
| 38 |                  |                                                  |       |
| 39 |                  |                                                  |       |
| 40 | Main results     | #16c If relevant, consider translating estimates | NA    |
| 41 |                  | of relative risk into absolute risk for a        |       |
| 42 |                  | meaningful time period                           |       |
| 43 |                  |                                                  |       |
| 44 |                  |                                                  |       |
| 45 |                  |                                                  |       |
| 46 | Other analyses   | #17 Report other analyses done—e.g.,             | NA    |
| 47 |                  | analyses of subgroups and interactions,          |       |
| 48 |                  | and sensitivity analyses                         |       |
| 49 |                  |                                                  |       |
| 50 |                  |                                                  |       |
| 51 | Discussion       |                                                  |       |
| 52 |                  |                                                  |       |
| 53 |                  |                                                  |       |
| 54 | Key results      | #18 Summarise key results with reference to      | 13    |
| 55 |                  | study objectives                                 |       |
| 56 |                  |                                                  |       |
| 57 |                  |                                                  |       |
| 58 | Limitations      | #19 Discuss limitations of the study, taking     | 17    |
| 59 |                  |                                                  |       |
| 60 |                  |                                                  |       |

1  
2  
3  
4  
5  
6  
7  
8  
9  
10  
11  
12  
13  
14  
15  
16  
17  
18  
19  
20  
21  
22  
23  
24  
25  
26  
27  
28  
29  
30  
31  
32  
33  
34  
35  
36  
37  
38  
39  
40  
41  
42  
43  
44  
45  
46  
47  
48  
49  
50  
51  
52  
53  
54  
55  
56  
57  
58  
59  
60

|                   |     |                                                                                                                                                                  |       |
|-------------------|-----|------------------------------------------------------------------------------------------------------------------------------------------------------------------|-------|
|                   |     | into account sources of potential bias or imprecision. Discuss both direction and magnitude of any potential bias.                                               |       |
| Interpretation    | #20 | Give a cautious overall interpretation considering objectives, limitations, multiplicity of analyses, results from similar studies, and other relevant evidence. | 13-17 |
| Generalisability  | #21 | Discuss the generalisability (external validity) of the study results                                                                                            | 17    |
| Other Information |     |                                                                                                                                                                  |       |
| Funding           | #22 | Give the source of funding and the role of the funders for the present study and, if applicable, for the original study on which the present article is based    | 17    |

None The STROBE checklist is distributed under the terms of the Creative Commons Attribution License CC-BY. This checklist can be completed online using <https://www.goodreports.org/>, a tool made by the EQUATOR Network in collaboration with Penelope.ai
